# Supplementary material for: Phase dependence and mechanical and thermal ductility of the luminescence properties of tetranuclear Cu(i) metallacycle assemblies stabilized by ditopic organo-pnictogen (P,As) ligands
Source: Royal Society of Chemistry journal article supplement (doi:10.1039/d3qi01544k), 2023-01-01
Supplement: d3qi01544k1.pdf [file d3qi01544k1.pdf]

## **Supporting Information**

|       |                                          |    |
|-------|------------------------------------------|----|
| I.    | Experimental section .....               | 2  |
| I.1.  | Synthesis.....                           | 3  |
| I.2.  | NMR spectroscopy: .....                  | 5  |
| I.3.  | Infrared spectroscopy: .....             | 7  |
| I.4.  | Powder X-Ray Diffraction diagrams: ..... | 10 |
| II.   | X-ray Crystallographic study .....       | 11 |
| III.  | SEM pictures .....                       | 17 |
| IV.   | Photophysical study.....                 | 18 |
| IV.1. | Sample pictures .....                    | 18 |
| IV.2. | Absorbance:.....                         | 19 |
| IV.3. | Excitation spectra: .....                | 20 |
| IV.4. | Emission spectra:.....                   | 21 |
| IV.5. | Decay time:.....                         | 24 |
| IV.6. | CIE coordinates:.....                    | 25 |
| V.    | Thermogravimetric analyses: .....        | 26 |
| VI.   | Computational details .....              | 29 |

## I. Experimental section

For the synthesis of  $L_{As,P}$  ligand, the procedure was adapted from literature<sup>1</sup> and performed under inert atmosphere with distilled solvent. The synthesis of the tetrametallic metallacycle compound **A** was performed under air in a simple flask. The metallacycle derivative **B** was synthesized as previously published by our group.<sup>2</sup> Commercially available reagents ( $[Cu(CH_3CN)_4].PF_6$  and dppm) and solvents were used as received without further purification.

$^1H$  and  $^{31}P\{^1H\}$  NMR spectra were recorded in  $CD_2Cl_2$  on Bruker AV400 spectrometers.  $^1H$  NMR chemical shifts were reported in parts per million (ppm) relative to  $Me_4Si$  as external standard.  $^{31}P\{^1H\}$  NMR downfield chemical shifts were expressed in ppm, relative to 85%  $H_3PO_4$  respectively.

FT-IR measurements have been performed on a Perkin Elmer Frontier spectrometer using UATR (Universal Attenuated Total Reflectance) accessory. Spectra have been recorded between  $650\text{ cm}^{-1}$  and  $4000\text{ cm}^{-1}$ , on pure solid samples.

UV-vis solid-state diffuse reflectance measurements were recorded on a Perkin-Elmer Lambda 650 spectrometer using a 60 mm integrating sphere. Reflectance spectra were recorded in relation to an external white reference (Spectralon<sup>®</sup>), between 800 nm and 200 nm with a spectral resolution of 1 nm on pure polycrystalline samples. The UV-vis spectra were transformed to apparent absorbance through  $\log(\text{reflectance}^{-1})$ .

Steady-state excitation and emission spectra measurements were recorded on a *Horiba Jobin-Yvon (HJY) Fluorolog-3 (FL3-2iHR550)* fluorescence spectrofluorometer equipped with an IR R928P PMT / *HJY FL-1073* detector. Low temperature measurements were allowed by using an OptistatCF (*Oxford Inst.*) in the range of 77 K to 300 K. Excited-state lifetimes in the range of 80 K to 300 K were measured with a delta diode system allowing to measure excited-state lifetimes longer than 10  $\mu s$ . Solid samples were placed in a quartz sample holder inside the cryostat and maintained at the desired temperature until equilibrium was reached before recording the spectrum.

The experimental data were then fitted according to the following equation:<sup>3</sup>

$$\tau(obs) = \frac{1 + \frac{1}{3} \exp\left(-\frac{\Delta E_{ST}}{k_B T}\right)}{\frac{1}{\tau(T_1)} + \frac{1}{3\tau(S_1)} \exp\left(-\frac{\Delta E_{ST}}{k_B T}\right)} \quad \text{Eq S1}$$

where  $\tau(obs)$ ,  $\tau(S_1)$ ,  $\tau(T_1)$ ,  $k_B$ ,  $T$  and  $\Delta E_{ST}$  represent the observed lifetime, singlet state decay lifetime, triplet state decay lifetime, Boltzmann constant, temperature and singlet-triplet energy difference, respectively.

Powder X-ray diffraction diagrams have been collected using a Panalytical X'Pert Pro diffractometer with an X'celerator detector. The typical recording conditions were 45 kV, 40 mA for Cu  $K\alpha$  ( $\lambda = 1.542\text{ \AA}$ ), the diagrams were recorded in theta/theta mode in 60 min between  $4^\circ$  and  $40^\circ$  with a step size of  $0.0084^\circ$  and a scan time of 50 s.

Thermal analyses have been performed using a Perkin Elmer Pyris Diamond TGA/TDA, between  $25^\circ C$  and  $270^\circ C$  in aluminum crucibles and between  $25^\circ C$  and  $950^\circ C$  in platinum crucibles under  $N_2$  atmosphere ( $5^\circ C/min$ ), and starting with a mass of sample ranging in between 5-40mg.

## I.1. Synthesis

### Synthesis of ligand $L_{As,P}$ :

Synthesis of  $Ph_2AsCl$  was slightly adapted based on a previously reported procedure.<sup>1</sup> To a dry nitrogen filled Schlenk flask of chloride diphenylarsyl (7.34 mmol, 1.94 g) was added trimethylsilane diphenylphosphinemethane (7.34 mmol, 2.0 g) and the mixture was heated to 115 °C for 2.5 hours. When cooling down to room temperature, a white solid precipitate was formed. The volatile residues were removed *in vacuo* and the solid residue was washed with dry hexane and then stored at ambient atmosphere (2.88 g, yield: 92%).

$^1H$  NMR (400 MHz,  $CD_2Cl_2$ , ppm):  $\delta$  = 7.44 (*m*,  $H_{Ar}$ , 8H), 7.30 (*m*,  $H_{Ar}$ , 12H), 2.72 (*d*,  $-CH_2-$ ,  $J$  = 2.3 Hz, H)

$^{31}P\{^1H\}$  NMR (161.98 MHz,  $CD_2Cl_2$ , ppm):  $\delta$  = -21.56 (*s*,  $P_{P,As}$ )

IR ( $cm^{-1}$ ): 3064, 2909, 1954 1880, 1812, 1759, 1656, 1579, 1479, 1431, 1377, 1305, 1269, 1181, 1155, 1120, 1074, 1024, 999, 969, 907, 844, 761, 733, 716, 690.

### Synthesis of derivative A:

$[Cu(CH_3CN)_4]PF_6$  (55.9 mg, 0.15 mmol) and  $Ph_2P-CH_2-AsPh_2$  (64.3 mg, 0.15 mmol) were dissolved in 15 ml dichloromethane and the solution was left undisturbed for 30 minutes. A methanol solution (3 ml) of KCN (4.9 mg, 0.075 mmol) was added to the crude solution. The colorless solution was stirred for 1 h. The solution was filtered over cotton and was left upon n-pentane vapor diffusion to obtain the product after crystallization (yields = 89 %).

$^1H$  NMR (400 MHz,  $CD_2Cl_2$ , ppm):  $\delta$  = 7.32–7.06 (*m*,  $H_{Ar}$ , 80H), 2.89 (*s*,  $-CH_2-$ , 8H)

$^{31}P\{^1H\}$  NMR (161.98 MHz,  $CD_2Cl_2$ , ppm):  $\delta$  = - 9.45 (*s*,  $P_{P,As}$ ), - 144.4 (*sept*,  $^1J(P-F)$  = 711.0 Hz,  $PF_6^-$ )

IR ( $cm^{-1}$ ): 3665, 3592, 3057, 2118 ( $\nu(C\equiv N)$ ), 1979, 1899, 1815, 1627, 1576, 1484, 1436, 1365, 1335, 1308, 1270, 1189, 1159, 1096, 1079, 1025, 999, 916, 833 ( $\nu = PF_6^-$ ), 731, 691.

Positive ion ESI-MS ( $CH_2Cl_2$ , RT):  $m/z$  (%) = 429.05  $[C_{25}H_{23}AsP]^+$ ; 490.97  $[C_{25}H_{22}AsPCu]^+$ ; 919.01  $[C_{50}H_{44}As_2P_2Cu]^+$ ; 1009.93 overlap, major part  $[C_{50}H_{44}As_2P_2Cu_2(CN)]^+$ , minor part  $[C_{100}H_{88}As_4P_4Cu_4(CN)_2]^{2+}$ , 2162.81  $\{[C_{100}H_{88}As_4P_4Cu_4(CN)_2]^{2+}[PF_6^-]\}^+$

Negative ion ESI-MS ( $CH_2Cl_2$ , RT):  $m/z$  (%) = 144.97  $[PF_6^-]$ .

### Preparation of derivative $A_g$ :

The ground sample phase **A<sub>g</sub>** was obtained applying a manual grinding on **A** polycrystalline powder using a pestle in an agate mortar. As this grinding was conducted under UV-vis lamp light excitation ( $\lambda_{\text{ex}} = 365 \text{ nm}$ ), a greenish light emission was immediately observed at the place the grinding was applied.

$^1\text{H}$  NMR (400 MHz,  $\text{CD}_2\text{Cl}_2$ , ppm):  $\delta = 7.33\text{--}7.07$  (*m*,  $\text{H}_{\text{Ar}}$ , 80H), 2.90 (*s*,  $-\text{CH}_2-$ , 8H)

$^{31}\text{P}\{^1\text{H}\}$  NMR (161.98 MHz,  $\text{CD}_2\text{Cl}_2$ , ppm):  $\delta = -9.59$  (*s*,  $\text{P}_{\text{P,As}}$ ),  $-144.4$  (*sept*,  $^1\text{J}(\text{P-F}) = 711.0 \text{ Hz}$ ,  $\text{PF}_6^-$ )

IR ( $\text{cm}^{-1}$ ): 2135 ( $\nu(\text{C}\equiv\text{N})$ )

#### Characterizations of derivative **A'** obtained from thermal treatment of the derivative **A**:

$^1\text{H}$  NMR (400 MHz,  $\text{CD}_2\text{Cl}_2$ , ppm):  $\delta = 7.37\text{--}7.11$  (*m*,  $\text{H}_{\text{Ar}}$ , 80H), 2.93 (*s*,  $-\text{CH}_2-$ , 8H)

$^{31}\text{P}\{^1\text{H}\}$  NMR (161.98 MHz,  $\text{CD}_2\text{Cl}_2$ , ppm):  $\delta = -9.69$  (*s*,  $\text{P}_{\text{P,As}}$ ),  $-144.4$  (*sept*,  $^1\text{J}(\text{P-F}) = 711.0 \text{ Hz}$ ,  $\text{PF}_6^-$ )

IR ( $\text{cm}^{-1}$ ): 2129 ( $\nu(\text{C}\equiv\text{N})$ )

#### Characterizations of derivative **A'** obtained from thermal treatment of the derivative **A<sub>g</sub>**:

$^1\text{H}$  NMR (400 MHz,  $\text{CD}_2\text{Cl}_2$ , ppm):  $\delta = 7.32\text{--}7.07$  (*m*,  $\text{H}_{\text{Ar}}$ , 80H), 2.89 (*s*,  $-\text{CH}_2-$ , 8H)

$^{31}\text{P}\{^1\text{H}\}$  NMR (161.98 MHz,  $\text{CD}_2\text{Cl}_2$ , ppm):  $\delta = -9.65$  (*s*,  $\text{P}_{\text{P,As}}$ ),  $-144.4$  (*sept*,  $^1\text{J}(\text{P-F}) = 711.0 \text{ Hz}$ ,  $\text{PF}_6^-$ )

IR ( $\text{cm}^{-1}$ ): 2129 ( $\nu(\text{C}\equiv\text{N})$ )

#### Characterizations of derivative **B<sub>g</sub>**:

$^1\text{H}$  NMR (400 MHz,  $\text{CD}_2\text{Cl}_2$ , ppm):  $\delta = 7.69\text{--}6.81$  (*m*,  $\text{H}_{\text{Ar}}$ , 80H), 3.06 (*s*,  $-\text{CH}_2-$ , 8H)

$^{31}\text{P}\{^1\text{H}\}$  NMR (161.98 MHz,  $\text{CD}_2\text{Cl}_2$ , ppm):  $\delta = -8.84$  (*s*,  $\text{P}_{\text{P,As}}$ ),  $-10.94$  (*s*,  $\text{P}_{\text{P,As}}$ ),  $-144.4$  (*sept*,  $^1\text{J}(\text{P-F}) = 711.0 \text{ Hz}$ ,  $\text{PF}_6^-$ )

IR ( $\text{cm}^{-1}$ ): 2121 ( $\nu(\text{C}\equiv\text{N})$ )

#### Characterizations of derivative **B'** obtained from thermal treatment of the derivative **B**:

$^1\text{H}$  NMR (400 MHz,  $\text{CD}_2\text{Cl}_2$ , ppm):  $\delta = 7.74\text{--}6.84$  (*m*,  $\text{H}_{\text{Ar}}$ , 80H), 3.09 (*s*,  $-\text{CH}_2-$ , 8H)

$^{31}\text{P}\{^1\text{H}\}$  NMR (161.98 MHz,  $\text{CD}_2\text{Cl}_2$ , ppm):  $\delta = -8.87$  (*s*,  $\text{P}_{\text{P,As}}$ ),  $-10.98$  (*s*,  $\text{P}_{\text{P,As}}$ ),  $-144.4$  (*sept*,  $^1\text{J}(\text{P-F}) = 711.0 \text{ Hz}$ ,  $\text{PF}_6^-$ )

IR ( $\text{cm}^{-1}$ ): 2126 ( $\nu(\text{C}\equiv\text{N})$ )

#### Characterizations of derivative **B'** obtained from thermal treatment of the derivative **B<sub>g</sub>**:

$^1\text{H}$  NMR (400 MHz,  $\text{CD}_2\text{Cl}_2$ , ppm):  $\delta = 7.69\text{--}6.81$  (*m*,  $\text{H}_{\text{Ar}}$ , 80H), 3.06 (*s*,  $-\text{CH}_2-$ , 8H)

$^{31}\text{P}\{^1\text{H}\}$  NMR (161.98 MHz,  $\text{CD}_2\text{Cl}_2$ , ppm):  $\delta = -8.84$  (*s*,  $\text{P}_{\text{P,As}}$ ),  $-10.94$  (*s*,  $\text{P}_{\text{P,As}}$ ),  $-144.4$  (*sept*,  $^1\text{J}(\text{P-F}) = 711.0 \text{ Hz}$ ,  $\text{PF}_6^-$ )

IR (cm<sup>-1</sup>): 2126 ( $\nu(\text{C}\equiv\text{N})$ )

## I.2. NMR spectroscopy:

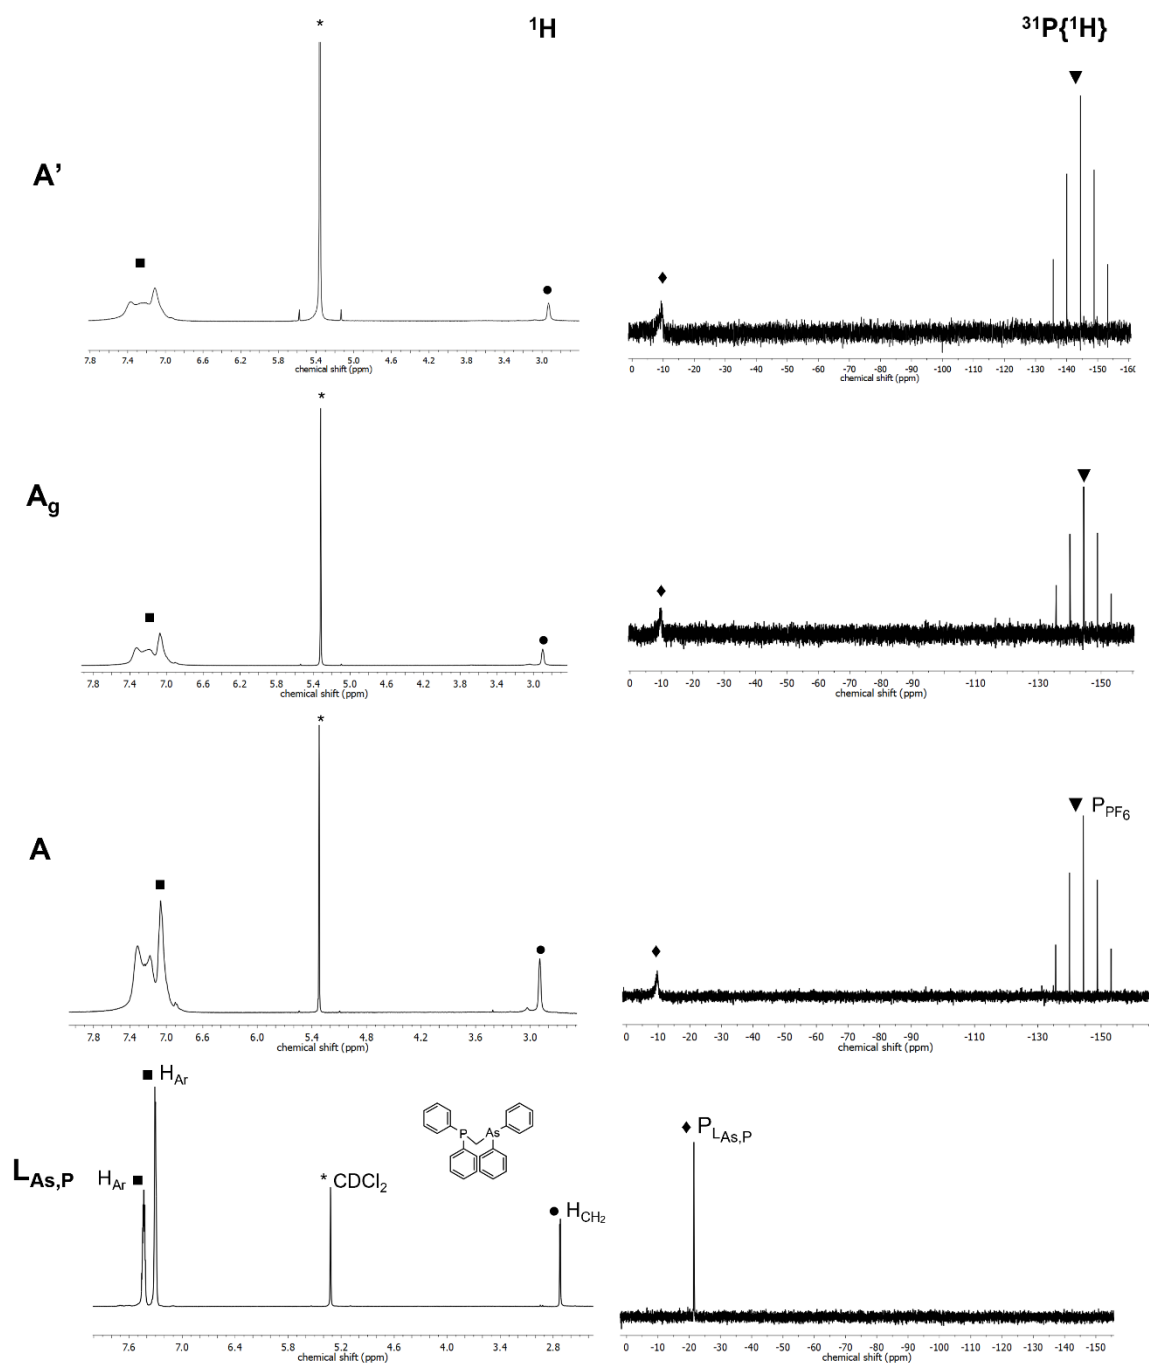

**Fig. S1.**  $^1\text{H}$  NMR (left) and  $^{31}\text{P}\{^1\text{H}\}$  NMR (right) spectra of  $\text{L}_{\text{As,P}}$  ligand and  $\text{A}$ ,  $\text{A}_g$  and  $\text{A}'$  phases in  $\text{CD}_2\text{Cl}_2$  at 400 MHz and 300 K

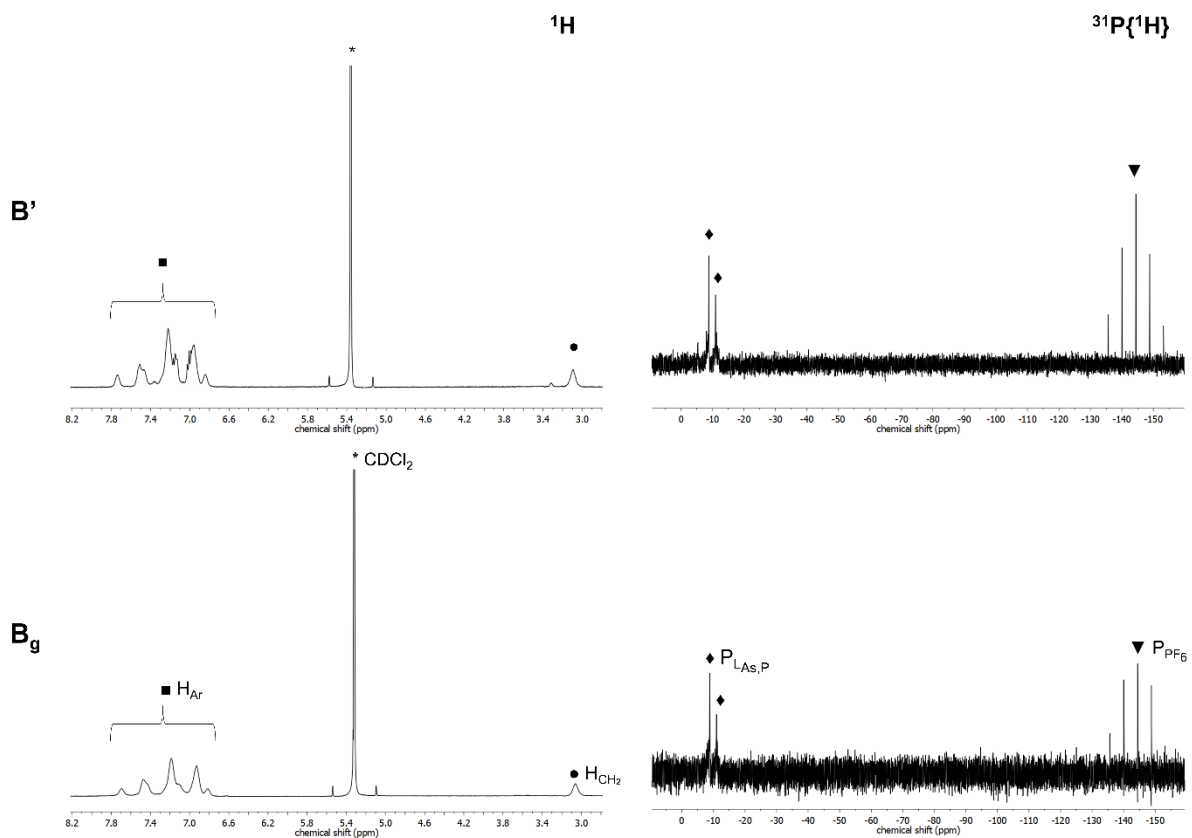

**Fig. S2.**  $^1\text{H}$  NMR (left) and  $^{31}\text{P}\{^1\text{H}\}$  NMR (right) spectra of  $B_g$  and  $B'$  phases in  $\text{CD}_2\text{Cl}_2$  at 400 MHz and 300 K

### I.3. Infrared spectroscopy:

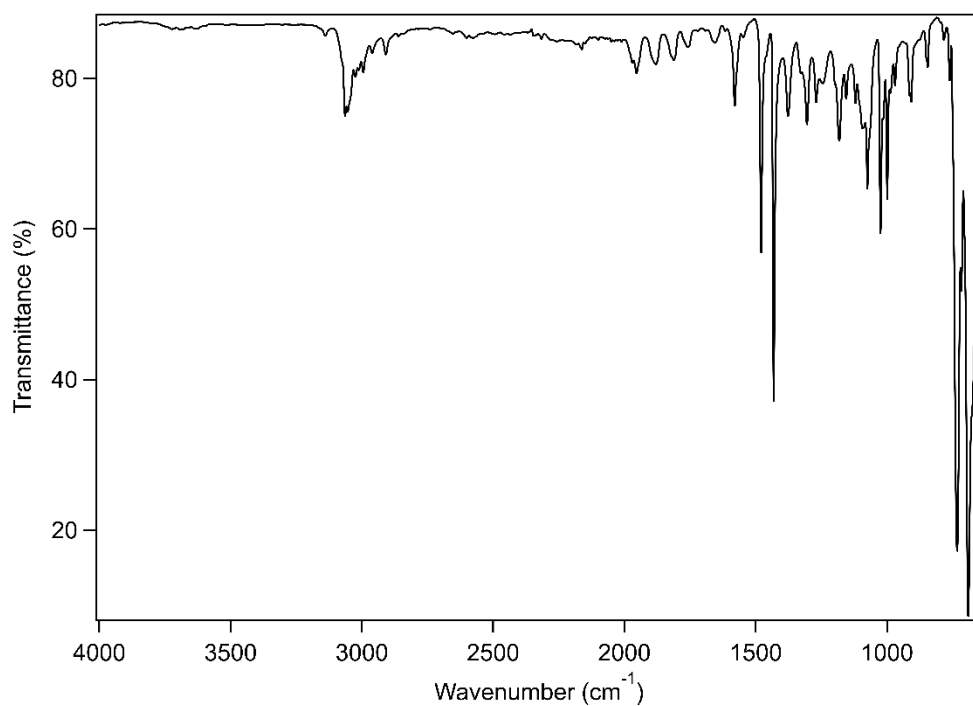

Fig. S3. Infrared spectrum of  $L_{As,p}$  ligand

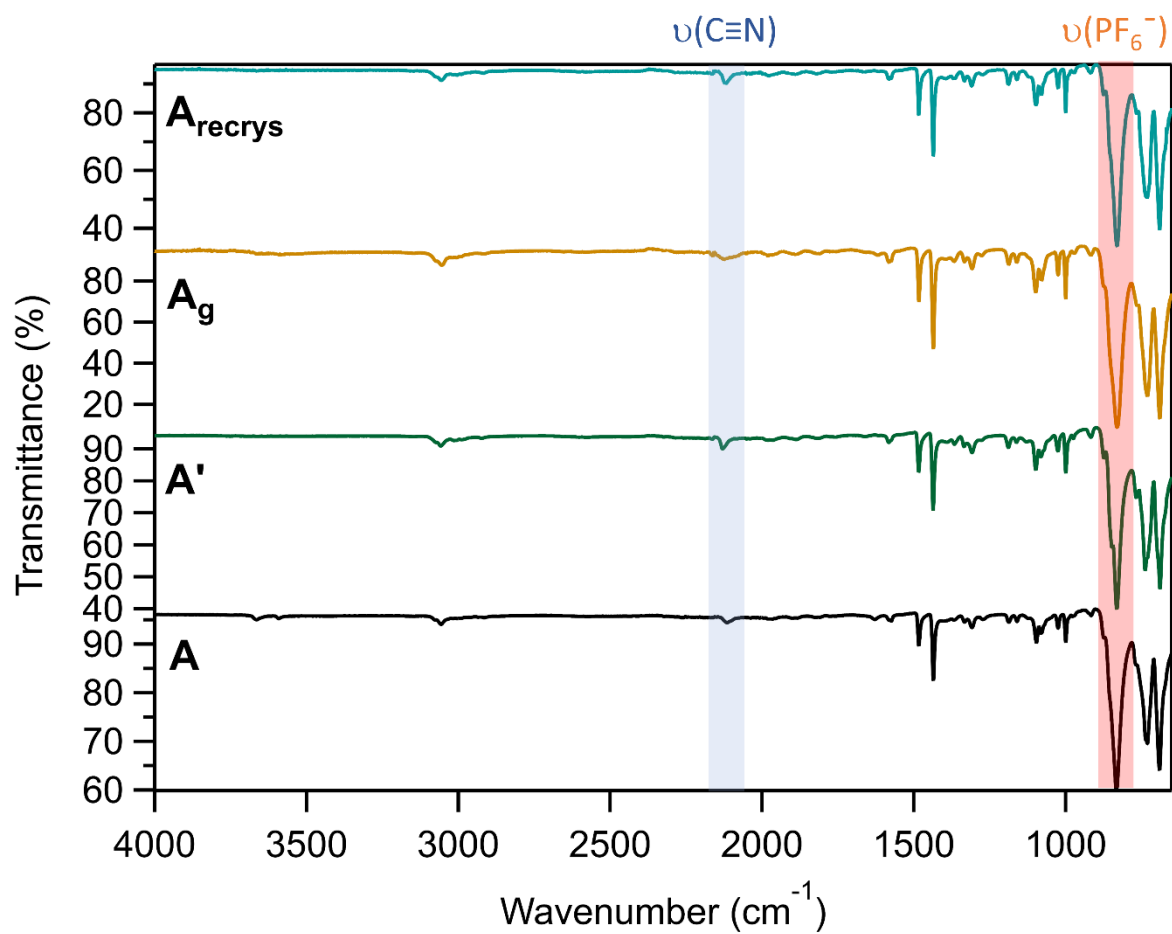

Fig. S4. Infrared spectra of derivatives  $A$  (black),  $A'$  (green),  $A_g$  (brown) and  $A_{recrys}$  (light blue).

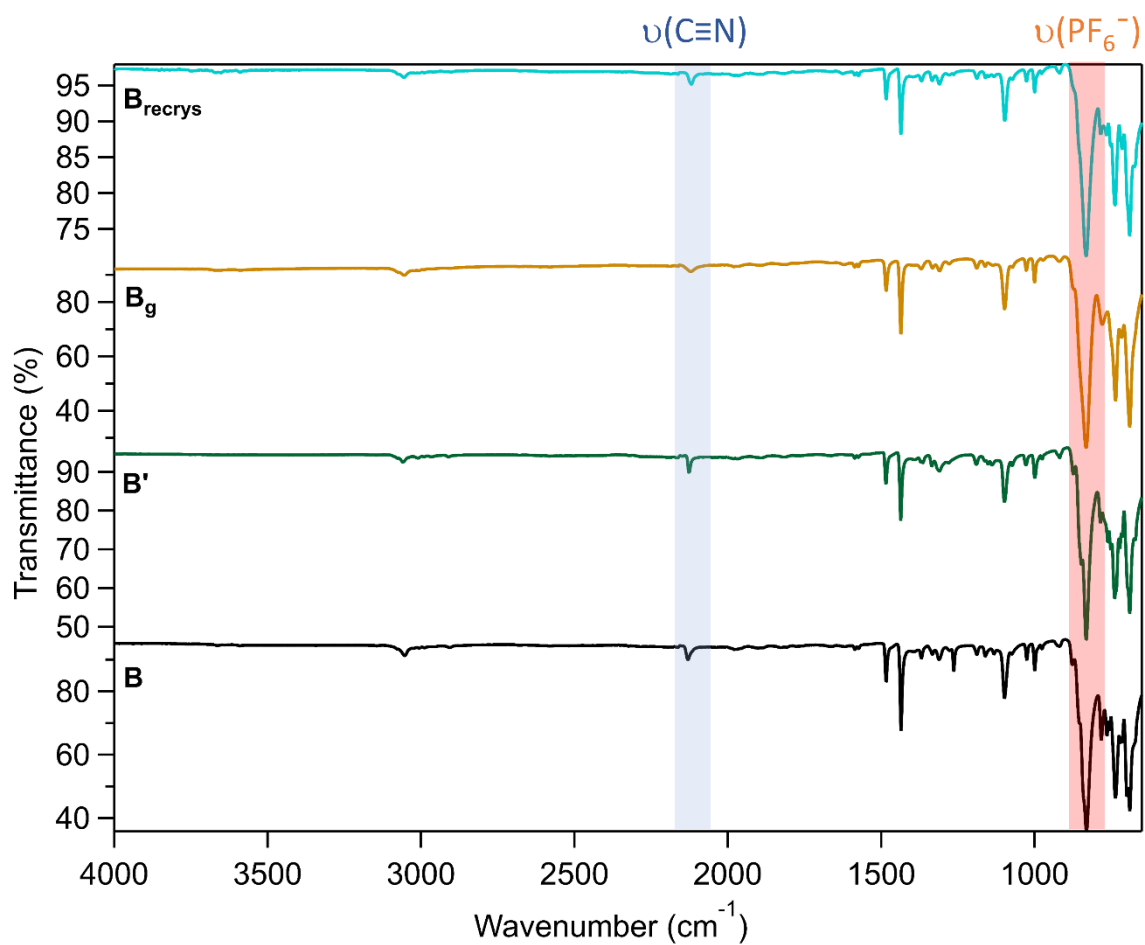

Fig. S5. Infrared spectra of derivatives **B<sup>2</sup>** (black), **B'** (green), **B<sub>g</sub>** (brown) and **B<sub>recrys</sub>** (light blue).



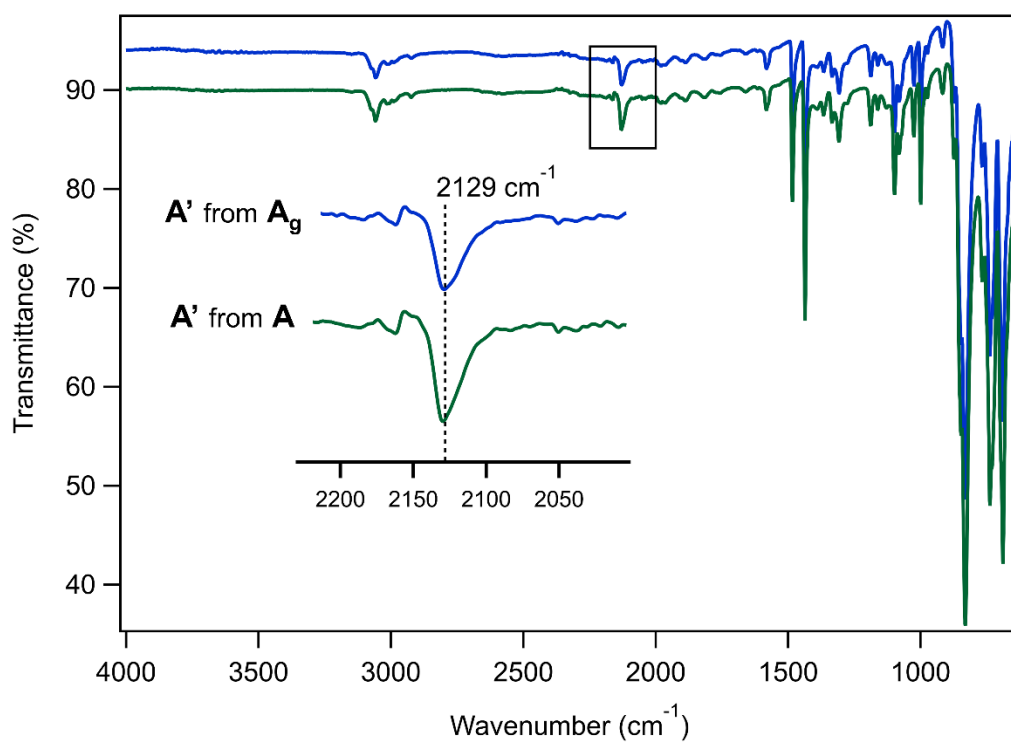

**Fig. S6.** Infrared spectra of derivative **A'** generated by thermal treatment of compound **A** (green curve) or of compound **A<sub>g</sub>** (blue curve)

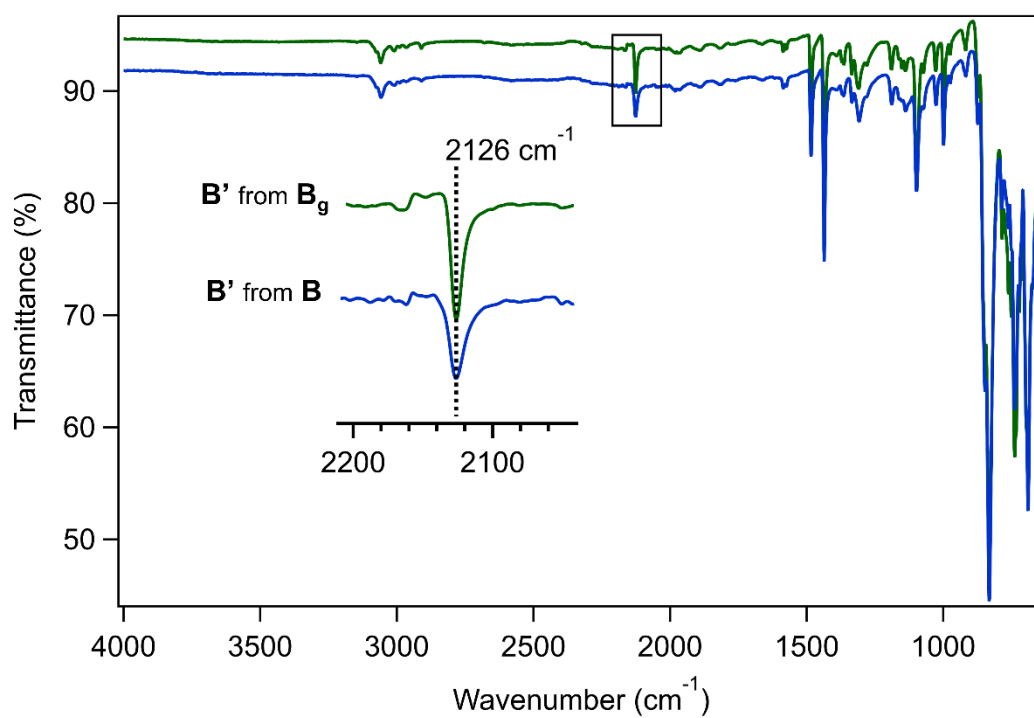

**Fig. S7.** Infrared spectra of derivative **B'** generated by thermal treatment of compound **B** (green curve) or of compound **B<sub>g</sub>** (blue curve)

#### I.4. Powder X-Ray Diffraction diagrams:

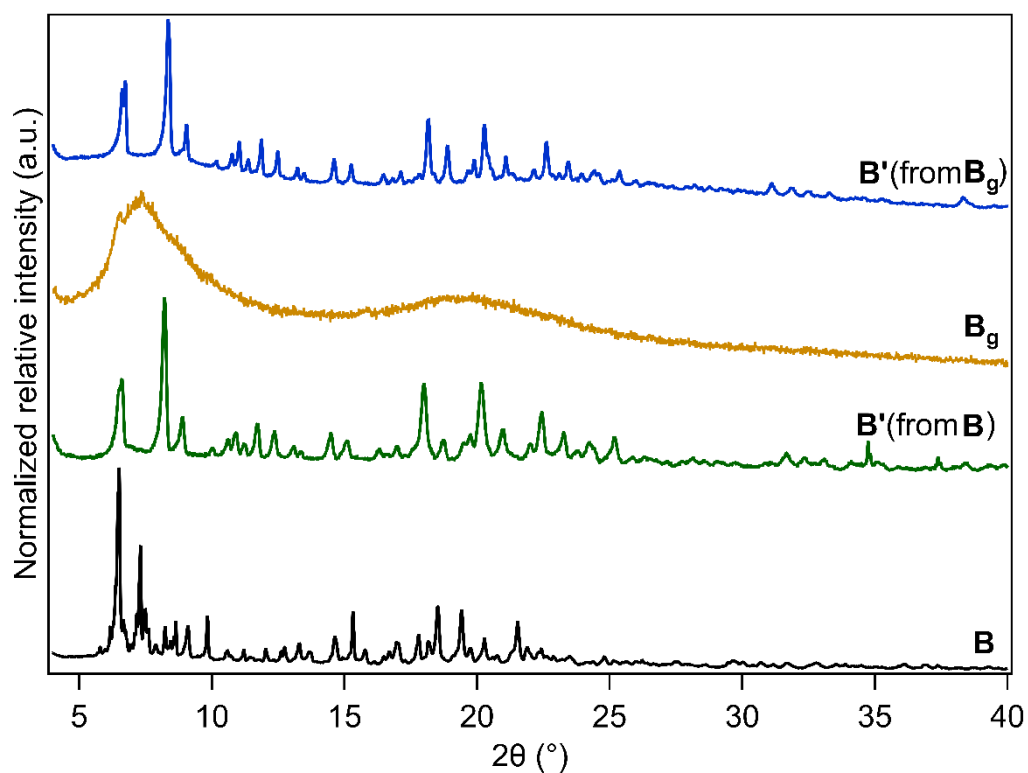

**Fig. S8.** Powder X-ray diffraction patterns of derivatives  $B^2$  (black),  $B'$  (green, generated from a thermal treatment of compound  $B$ ),  $B_g$ , and  $B'$  (blue, generated from a thermal treatment of compound  $B_g$ )

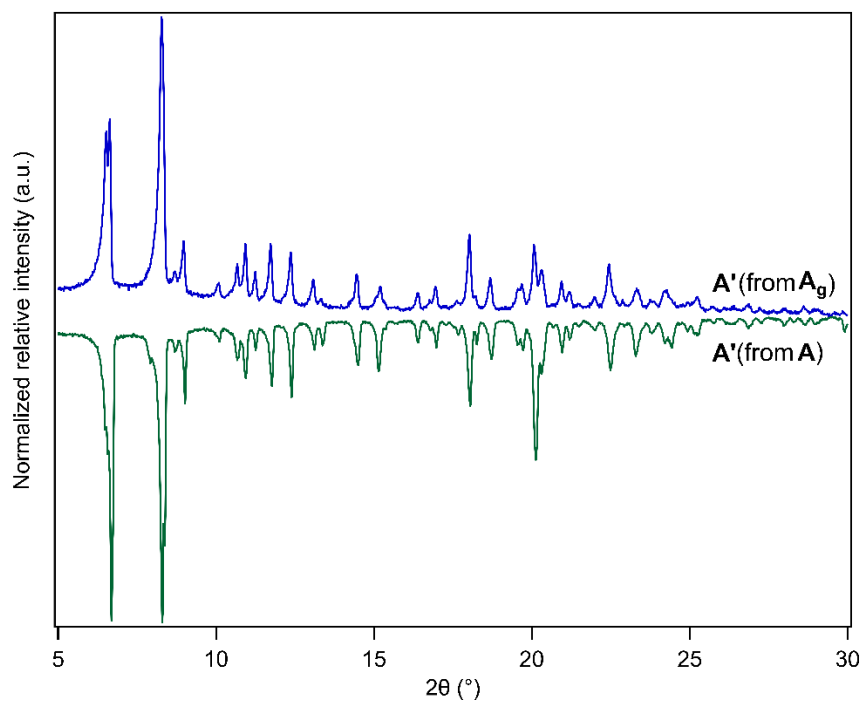

**Fig. S9.** Powder X-ray diffraction patterns of derivatives  $A'$  generated by a thermal treatment of compound  $A$  (green) or compound  $A_g$  (blue)

## II. X-ray Crystallographic study

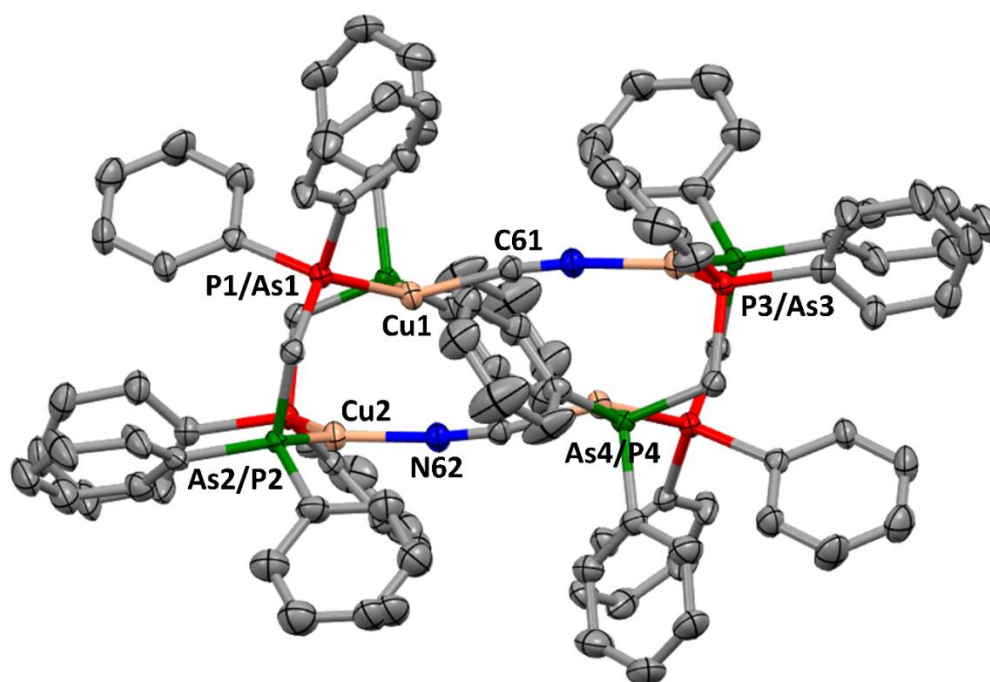

Fig. S10. ORTEP of derivative A

Table S1. Bond Lengths for derivative A at 150 K.

| Atom | Atom             | Length/Å   | Atom | Atom | Length/Å  |
|------|------------------|------------|------|------|-----------|
| Cu1  | N61              | 1.946(6)   | C21  | C22  | 1.3900    |
| Cu1  | C61              | 1.946(6)   | C22  | C23  | 1.3900    |
| Cu1  | P1               | 2.2827(12) | C23  | C24  | 1.3900    |
| Cu1  | As1              | 2.2827(12) | C24  | C25  | 1.3900    |
| Cu1  | As4 <sup>1</sup> | 2.2962(12) | C20B | C21B | 1.406(15) |
| Cu1  | Cu2 <sup>1</sup> | 2.9575(12) | C20B | C25B | 1.430(14) |
| Cu2  | C62              | 1.919(6)   | C21B | C22B | 1.389(16) |
| Cu2  | N62              | 1.919(6)   | C22B | C23B | 1.390(17) |
| Cu2  | P3               | 2.2726(13) | C23B | C24B | 1.369(17) |
| Cu2  | As3              | 2.2726(13) | C24B | C25B | 1.393(15) |
| Cu2  | As2 <sup>1</sup> | 2.2944(12) | C31  | C32  | 1.383(10) |
| P1   | C7               | 1.873(6)   | C31  | C36  | 1.387(10) |
| P1   | C13              | 1.889(6)   | C32  | C33  | 1.381(12) |
| P1   | C1               | 1.900(6)   | C33  | C34  | 1.376(15) |
| As2  | C14              | 1.881(7)   | C34  | C35  | 1.381(14) |
| As2  | C20              | 1.882(5)   | C35  | C36  | 1.391(12) |
| As2  | C13              | 1.929(6)   | C37  | C42  | 1.364(10) |
| P3   | C31              | 1.862(7)   | C37  | C38  | 1.386(10) |
| P3   | C37              | 1.886(7)   | C38  | C39  | 1.399(10) |
| P3   | C43              | 1.906(6)   | C39  | C40  | 1.333(13) |
| As4  | C44              | 1.876(7)   | C40  | C41  | 1.349(13) |

|     |      |           |      |      |           |
|-----|------|-----------|------|------|-----------|
| As4 | C50  | 1.900(6)  | C41  | C42  | 1.398(11) |
| As4 | C43  | 1.904(6)  | C44  | C49  | 1.375(10) |
| As1 | C7   | 1.873(6)  | C44  | C45  | 1.386(10) |
| As1 | C13  | 1.889(6)  | C45  | C46  | 1.390(13) |
| As1 | C1   | 1.900(6)  | C46  | C47  | 1.363(14) |
| P2  | C14  | 1.881(7)  | C47  | C48  | 1.363(11) |
| P2  | C20B | 1.882(5)  | C48  | C49  | 1.386(10) |
| P2  | C13  | 1.929(6)  | C50  | C51  | 1.380(10) |
| As3 | C31  | 1.862(7)  | C50  | C55  | 1.388(10) |
| As3 | C37  | 1.886(7)  | C51  | C52  | 1.372(11) |
| As3 | C43  | 1.906(6)  | C52  | C53  | 1.385(13) |
| P4  | C44  | 1.876(7)  | C53  | C54  | 1.363(13) |
| P4  | C50  | 1.900(6)  | C54  | C55  | 1.385(11) |
| P4  | C43  | 1.904(6)  | C61  | N62  | 1.155(8)  |
| C1  | C6   | 1.372(10) | N61  | C62  | 1.155(8)  |
| C1  | C2   | 1.400(9)  | P11  | F1   | 1.571(6)  |
| C2  | C3   | 1.375(10) | P11  | F5   | 1.578(7)  |
| C3  | C4   | 1.387(13) | P11  | F2   | 1.579(7)  |
| C4  | C5   | 1.388(13) | P11  | F6   | 1.586(6)  |
| C5  | C6   | 1.400(10) | P11  | F3   | 1.606(5)  |
| C7  | C12  | 1.392(9)  | P11  | F4   | 1.610(5)  |
| C7  | C8   | 1.397(9)  | C81  | Cl1  | 1.729(13) |
| C8  | C9   | 1.389(11) | C81  | Cl2  | 1.757(13) |
| C9  | C10  | 1.380(12) | C81B | Cl1B | 1.733(16) |
| C10 | C11  | 1.387(12) | C81B | Cl2B | 1.785(16) |
| C11 | C12  | 1.385(10) | C82  | Cl3  | 1.658(13) |
| C14 | C15  | 1.383(10) | C82  | Cl4  | 1.805(14) |
| C14 | C19  | 1.389(10) | C82B | Cl4B | 1.651(17) |
| C15 | C16  | 1.397(11) | C82B | Cl3B | 1.696(14) |
| C16 | C17  | 1.379(14) | C83  | Cl5  | 1.728(14) |
| C17 | C18  | 1.375(13) | C83  | Cl6  | 1.791(14) |
| C18 | C19  | 1.389(11) | C83B | Cl5B | 1.725(17) |
| C20 | C21  | 1.3900    | C83B | Cl6B | 1.778(17) |
| C20 | C25  | 1.3900    |      |      |           |

<sup>1</sup>1-X,1-Y,1-Z

**Table S2.** Bond Angles for derivative **A** 150 K

| Atom | Atom | Atom             | Angle/°    | Atom | Atom | Atom | Angle/°  |
|------|------|------------------|------------|------|------|------|----------|
| C61  | Cu1  | P1               | 120.75(18) | C19  | C14  | As2  | 117.7(5) |
| N61  | Cu1  | As1              | 120.75(18) | C14  | C15  | C16  | 119.8(8) |
| N61  | Cu1  | As4 <sup>1</sup> | 110.41(17) | C17  | C16  | C15  | 120.5(8) |
| C61  | Cu1  | As4 <sup>1</sup> | 110.41(17) | C18  | C17  | C16  | 119.6(8) |

|                  |     |                  |            |      |      |      |           |
|------------------|-----|------------------|------------|------|------|------|-----------|
| P1               | Cu1 | As4 <sup>1</sup> | 118.91(5)  | C17  | C18  | C19  | 120.4(8)  |
| As1              | Cu1 | As4 <sup>1</sup> | 118.91(5)  | C18  | C19  | C14  | 120.2(7)  |
| C61              | Cu1 | Cu2 <sup>1</sup> | 133.73(18) | C21  | C20  | C25  | 120.0     |
| P1               | Cu1 | Cu2 <sup>1</sup> | 82.14(4)   | C21  | C20  | As2  | 119.7(4)  |
| As4 <sup>1</sup> | Cu1 | Cu2 <sup>1</sup> | 85.81(4)   | C25  | C20  | As2  | 120.2(4)  |
| N62              | Cu2 | P3               | 121.24(19) | C22  | C21  | C20  | 120.0     |
| C62              | Cu2 | As3              | 121.24(19) | C21  | C22  | C23  | 120.0     |
| N62              | Cu2 | As2 <sup>1</sup> | 109.61(19) | C24  | C23  | C22  | 120.0     |
| P3               | Cu2 | As2 <sup>1</sup> | 128.66(5)  | C23  | C24  | C25  | 120.0     |
| N62              | Cu2 | Cu1 <sup>1</sup> | 61.66(19)  | C24  | C25  | C20  | 120.0     |
| P3               | Cu2 | Cu1 <sup>1</sup> | 97.97(4)   | C21B | C20B | C25B | 113.9(10) |
| As2 <sup>1</sup> | Cu2 | Cu1 <sup>1</sup> | 99.87(4)   | C21B | C20B | P2   | 126.8(8)  |
| C7               | P1  | C13              | 105.2(3)   | C25B | C20B | P2   | 117.4(7)  |
| C7               | P1  | C1               | 101.2(3)   | C22B | C21B | C20B | 121.5(15) |
| C13              | P1  | C1               | 100.9(3)   | C21B | C22B | C23B | 121.6(17) |
| C7               | P1  | Cu1              | 115.56(19) | C24B | C23B | C22B | 118.7(17) |
| C13              | P1  | Cu1              | 119.03(19) | C23B | C24B | C25B | 119.4(16) |
| C1               | P1  | Cu1              | 112.6(2)   | C24B | C25B | C20B | 123.1(14) |
| C14              | As2 | C20              | 101.3(3)   | C32  | C31  | C36  | 118.4(7)  |
| C14              | As2 | C13              | 104.9(3)   | C32  | C31  | As3  | 122.1(5)  |
| C20              | As2 | C13              | 101.3(3)   | C36  | C31  | As3  | 119.5(6)  |
| C14              | As2 | Cu2 <sup>1</sup> | 123.1(2)   | C32  | C31  | P3   | 122.1(5)  |
| C20              | As2 | Cu2 <sup>1</sup> | 114.9(2)   | C36  | C31  | P3   | 119.5(6)  |
| C13              | As2 | Cu2 <sup>1</sup> | 108.89(18) | C33  | C32  | C31  | 121.2(8)  |
| C31              | P3  | C37              | 103.4(3)   | C34  | C33  | C32  | 119.9(9)  |
| C31              | P3  | C43              | 102.3(3)   | C33  | C34  | C35  | 120.1(8)  |
| C37              | P3  | C43              | 100.8(3)   | C34  | C35  | C36  | 119.6(8)  |
| C31              | P3  | Cu2              | 117.8(2)   | C31  | C36  | C35  | 120.8(8)  |
| C37              | P3  | Cu2              | 120.3(2)   | C42  | C37  | C38  | 118.3(7)  |
| C43              | P3  | Cu2              | 109.6(2)   | C42  | C37  | P3   | 122.2(5)  |
| C44              | As4 | C50              | 103.2(3)   | C38  | C37  | P3   | 119.4(5)  |
| C44              | As4 | C43              | 103.9(3)   | C42  | C37  | As3  | 122.2(5)  |
| C50              | As4 | C43              | 101.7(3)   | C38  | C37  | As3  | 119.4(5)  |
| C44              | As4 | Cu1 <sup>1</sup> | 121.0(2)   | C37  | C38  | C39  | 119.9(7)  |
| C50              | As4 | Cu1 <sup>1</sup> | 109.9(2)   | C40  | C39  | C38  | 120.4(8)  |
| C43              | As4 | Cu1 <sup>1</sup> | 114.9(2)   | C39  | C40  | C41  | 120.9(7)  |
| C7               | As1 | C13              | 105.2(3)   | C40  | C41  | C42  | 119.9(9)  |
| C7               | As1 | C1               | 101.2(3)   | C37  | C42  | C41  | 120.6(8)  |
| C13              | As1 | C1               | 100.9(3)   | As4  | C43  | P3   | 110.9(3)  |
| C7               | As1 | Cu1              | 115.56(19) | P4   | C43  | As3  | 110.9(3)  |
| C13              | As1 | Cu1              | 119.03(19) | C49  | C44  | C45  | 118.8(7)  |
| C1               | As1 | Cu1              | 112.6(2)   | C49  | C44  | As4  | 118.7(5)  |
| C14              | P2  | C20B             | 101.3(3)   | C45  | C44  | As4  | 122.5(6)  |

|      |     |                  |            |      |      |      |           |
|------|-----|------------------|------------|------|------|------|-----------|
| C14  | P2  | C13              | 104.9(3)   | C49  | C44  | P4   | 118.7(5)  |
| C20B | P2  | C13              | 101.3(3)   | C45  | C44  | P4   | 122.5(6)  |
| C14  | P2  | Cu2 <sup>1</sup> | 123.1(2)   | C44  | C45  | C46  | 119.5(8)  |
| C13  | P2  | Cu2 <sup>1</sup> | 108.89(18) | C47  | C46  | C45  | 121.2(9)  |
| C31  | As3 | C37              | 103.4(3)   | C48  | C47  | C46  | 119.3(8)  |
| C31  | As3 | C43              | 102.3(3)   | C47  | C48  | C49  | 120.5(7)  |
| C37  | As3 | C43              | 100.8(3)   | C44  | C49  | C48  | 120.7(7)  |
| C31  | As3 | Cu2              | 117.8(2)   | C51  | C50  | C55  | 118.8(7)  |
| C37  | As3 | Cu2              | 120.3(2)   | C51  | C50  | P4   | 117.2(5)  |
| C43  | As3 | Cu2              | 109.6(2)   | C55  | C50  | P4   | 124.0(5)  |
| C44  | P4  | C50              | 103.2(3)   | C51  | C50  | As4  | 117.2(5)  |
| C44  | P4  | C43              | 103.9(3)   | C55  | C50  | As4  | 124.0(5)  |
| C50  | P4  | C43              | 101.7(3)   | C52  | C51  | C50  | 121.1(7)  |
| C44  | P4  | Cu1 <sup>1</sup> | 121.0(2)   | C51  | C52  | C53  | 120.1(8)  |
| C50  | P4  | Cu1 <sup>1</sup> | 109.9(2)   | C54  | C53  | C52  | 119.1(7)  |
| C43  | P4  | Cu1 <sup>1</sup> | 114.9(2)   | C53  | C54  | C55  | 121.4(8)  |
| C6   | C1  | C2               | 120.7(6)   | C54  | C55  | C50  | 119.5(8)  |
| C6   | C1  | P1               | 121.3(5)   | N62  | C61  | Cu1  | 170.6(6)  |
| C2   | C1  | P1               | 118.0(5)   | C61  | N62  | Cu2  | 173.6(6)  |
| C6   | C1  | As1              | 121.3(5)   | C62  | N61  | Cu1  | 170.6(6)  |
| C2   | C1  | As1              | 118.0(5)   | N61  | C62  | Cu2  | 173.6(6)  |
| C3   | C2  | C1               | 119.7(7)   | F1   | P11  | F5   | 89.4(5)   |
| C2   | C3  | C4               | 120.6(7)   | F1   | P11  | F2   | 92.0(5)   |
| C3   | C4  | C5               | 119.3(7)   | F5   | P11  | F2   | 178.6(5)  |
| C4   | C5  | C6               | 120.8(8)   | F1   | P11  | F6   | 177.8(4)  |
| C1   | C6  | C5               | 118.9(7)   | F5   | P11  | F6   | 89.3(4)   |
| C12  | C7  | C8               | 119.1(6)   | F2   | P11  | F6   | 89.3(4)   |
| C12  | C7  | P1               | 124.5(5)   | F1   | P11  | F3   | 92.1(3)   |
| C8   | C7  | P1               | 116.3(5)   | F5   | P11  | F3   | 89.4(3)   |
| C12  | C7  | As1              | 124.5(5)   | F2   | P11  | F3   | 90.8(4)   |
| C8   | C7  | As1              | 116.3(5)   | F6   | P11  | F3   | 89.7(3)   |
| C9   | C8  | C7               | 120.4(7)   | F1   | P11  | F4   | 88.6(3)   |
| C10  | C9  | C8               | 119.9(7)   | F5   | P11  | F4   | 90.7(3)   |
| C9   | C10 | C11              | 120.1(7)   | F2   | P11  | F4   | 89.1(3)   |
| C12  | C11 | C10              | 120.3(7)   | F6   | P11  | F4   | 89.6(3)   |
| C11  | C12 | C7               | 120.1(7)   | F3   | P11  | F4   | 179.3(3)  |
| As1  | C13 | P2               | 112.2(3)   | Cl1  | C81  | Cl2  | 111.7(10) |
| P1   | C13 | As2              | 112.2(3)   | Cl1B | C81B | Cl2B | 105.1(10) |
| C15  | C14 | C19              | 119.5(7)   | Cl3  | C82  | Cl4  | 101.3(8)  |
| C15  | C14 | P2               | 122.8(6)   | Cl4B | C82B | Cl3B | 114.7(8)  |
| C19  | C14 | P2               | 117.7(5)   | Cl5  | C83  | Cl6  | 112.5(8)  |
| C15  | C14 | As2              | 122.8(6)   | Cl5B | C83B | Cl6B | 109.5(11) |

<sup>1</sup>1-X,1-Y,1-Z

**Table S3.** Torsion Angles for derivative **A** at 150K.

| A    | B   | C   | D   | Angle/°   | A    | B    | C    | D    | Angle/°   |
|------|-----|-----|-----|-----------|------|------|------|------|-----------|
| C6   | C1  | C2  | C3  | 1.3(10)   | C20B | C21B | C22B | C23B | 9(4)      |
| P1   | C1  | C2  | C3  | -177.9(5) | C21B | C22B | C23B | C24B | -7(4)     |
| As1  | C1  | C2  | C3  | -177.9(5) | C22B | C23B | C24B | C25B | 8(4)      |
| C1   | C2  | C3  | C4  | 0.6(11)   | C23B | C24B | C25B | C20B | -12(3)    |
| C2   | C3  | C4  | C5  | -1.0(12)  | C21B | C20B | C25B | C24B | 13(2)     |
| C3   | C4  | C5  | C6  | -0.5(13)  | P2   | C20B | C25B | C24B | 178.8(16) |
| C2   | C1  | C6  | C5  | -2.7(11)  | C37  | As3  | C31  | C32  | -58.4(7)  |
| P1   | C1  | C6  | C5  | 176.5(6)  | C43  | As3  | C31  | C32  | 46.0(7)   |
| As1  | C1  | C6  | C5  | 176.5(6)  | Cu2  | As3  | C31  | C32  | 166.1(6)  |
| C4   | C5  | C6  | C1  | 2.3(13)   | C37  | As3  | C31  | C36  | 122.9(6)  |
| C13  | P1  | C7  | C12 | -2.2(6)   | C43  | As3  | C31  | C36  | -132.6(6) |
| C1   | P1  | C7  | C12 | -106.9(6) | Cu2  | As3  | C31  | C36  | -12.5(6)  |
| Cu1  | P1  | C7  | C12 | 131.2(5)  | C37  | P3   | C31  | C32  | -58.4(7)  |
| C13  | P1  | C7  | C8  | 177.3(5)  | C43  | P3   | C31  | C32  | 46.0(7)   |
| C1   | P1  | C7  | C8  | 72.6(6)   | Cu2  | P3   | C31  | C32  | 166.1(6)  |
| Cu1  | P1  | C7  | C8  | -49.2(6)  | C37  | P3   | C31  | C36  | 122.9(6)  |
| C13  | As1 | C7  | C12 | -2.2(6)   | C43  | P3   | C31  | C36  | -132.6(6) |
| C1   | As1 | C7  | C12 | -106.9(6) | Cu2  | P3   | C31  | C36  | -12.5(6)  |
| Cu1  | As1 | C7  | C12 | 131.2(5)  | C36  | C31  | C32  | C33  | 2.4(12)   |
| C13  | As1 | C7  | C8  | 177.3(5)  | As3  | C31  | C32  | C33  | -176.3(7) |
| C1   | As1 | C7  | C8  | 72.6(6)   | P3   | C31  | C32  | C33  | -176.3(7) |
| Cu1  | As1 | C7  | C8  | -49.2(6)  | C31  | C32  | C33  | C34  | -2.0(15)  |
| C12  | C7  | C8  | C9  | -0.1(11)  | C32  | C33  | C34  | C35  | 0.5(15)   |
| P1   | C7  | C8  | C9  | -179.7(7) | C33  | C34  | C35  | C36  | 0.6(13)   |
| As1  | C7  | C8  | C9  | -179.7(7) | C32  | C31  | C36  | C35  | -1.3(11)  |
| C7   | C8  | C9  | C10 | -0.7(14)  | As3  | C31  | C36  | C35  | 177.4(6)  |
| C8   | C9  | C10 | C11 | 0.6(14)   | P3   | C31  | C36  | C35  | 177.4(6)  |
| C9   | C10 | C11 | C12 | 0.2(14)   | C34  | C35  | C36  | C31  | -0.2(12)  |
| C10  | C11 | C12 | C7  | -1.0(12)  | C31  | P3   | C37  | C42  | -23.2(8)  |
| C8   | C7  | C12 | C11 | 1.0(10)   | C43  | P3   | C37  | C42  | -128.8(8) |
| P1   | C7  | C12 | C11 | -179.5(6) | Cu2  | P3   | C37  | C42  | 110.8(7)  |
| As1  | C7  | C12 | C11 | -179.5(6) | C31  | P3   | C37  | C38  | 161.4(6)  |
| C7   | As1 | C13 | P2  | 82.9(3)   | C43  | P3   | C37  | C38  | 55.8(6)   |
| C1   | As1 | C13 | P2  | -172.3(3) | Cu2  | P3   | C37  | C38  | -64.6(6)  |
| Cu1  | As1 | C13 | P2  | -48.6(4)  | C31  | As3  | C37  | C42  | -23.2(8)  |
| C7   | P1  | C13 | As2 | 82.9(3)   | C43  | As3  | C37  | C42  | -128.8(8) |
| C1   | P1  | C13 | As2 | -172.3(3) | Cu2  | As3  | C37  | C42  | 110.8(7)  |
| Cu1  | P1  | C13 | As2 | -48.6(4)  | C31  | As3  | C37  | C38  | 161.4(6)  |
| C20B | P2  | C14 | C15 | 69.2(7)   | C43  | As3  | C37  | C38  | 55.8(6)   |
| C13  | P2  | C14 | C15 | -35.8(7)  | Cu2  | As3  | C37  | C38  | -64.6(6)  |

|                      |      |      |            |                  |     |     |     |           |           |
|----------------------|------|------|------------|------------------|-----|-----|-----|-----------|-----------|
| Cu2 <sup>1</sup> P2  | C14  | C15  | -160.8(6)  | C42              | C37 | C38 | C39 | -1.1(12)  |           |
| C20BP2               | C14  | C19  | -113.7(6)  | P3               | C37 | C38 | C39 | 174.5(6)  |           |
| C13 P2               | C14  | C19  | 141.3(5)   | As3              | C37 | C38 | C39 | 174.5(6)  |           |
| Cu2 <sup>1</sup> P2  | C14  | C19  | 16.3(6)    | C37              | C38 | C39 | C40 | 1.5(12)   |           |
| C20 As2              | C14  | C15  | 69.2(7)    | C38              | C39 | C40 | C41 | -1.9(14)  |           |
| C13 As2              | C14  | C15  | -35.8(7)   | C39              | C40 | C41 | C42 | 1.8(18)   |           |
| Cu2 <sup>1</sup> As2 | C14  | C15  | -160.8(6)  | C38              | C37 | C42 | C41 | 1.1(15)   |           |
| C20 As2              | C14  | C19  | -113.7(6)  | P3               | C37 | C42 | C41 | -174.5(9) |           |
| C13 As2              | C14  | C19  | 141.3(5)   | As3              | C37 | C42 | C41 | -174.5(9) |           |
| Cu2 <sup>1</sup> As2 | C14  | C19  | 16.3(6)    | C40              | C41 | C42 | C37 | -1.4(18)  |           |
| C19 C14              | C15  | C16  | -2.2(12)   | C50              | As4 | C44 | C49 | -155.0(6) |           |
| P2 C14               | C15  | C16  | 174.8(7)   | C43              | As4 | C44 | C49 | 99.2(6)   |           |
| As2 C14              | C15  | C16  | 174.8(7)   | Cu1 <sup>1</sup> | As4 | C44 | C49 | -31.7(7)  |           |
| C14 C15              | C16  | C17  | 0.9(15)    | C50              | As4 | C44 | C45 | 25.1(9)   |           |
| C15 C16              | C17  | C18  | 1.1(16)    | C43              | As4 | C44 | C45 | -80.7(9)  |           |
| C16 C17              | C18  | C19  | -1.8(15)   | Cu1 <sup>1</sup> | As4 | C44 | C45 | 148.4(8)  |           |
| C17 C18              | C19  | C14  | 0.5(13)    | C50              | P4  | C44 | C49 | -155.0(6) |           |
| C15 C14              | C19  | C18  | 1.6(11)    | C43              | P4  | C44 | C49 | 99.2(6)   |           |
| P2 C14               | C19  | C18  | -175.6(6)  | Cu1 <sup>1</sup> | P4  | C44 | C49 | -31.7(7)  |           |
| As2 C14              | C19  | C18  | -175.6(6)  | C50              | P4  | C44 | C45 | 25.1(9)   |           |
| C14 As2              | C20  | C21  | 14.7(5)    | C43              | P4  | C44 | C45 | -80.7(9)  |           |
| C13 As2              | C20  | C21  | 122.6(5)   | Cu1 <sup>1</sup> | P4  | C44 | C45 | 148.4(8)  |           |
| Cu2 <sup>1</sup> As2 | C20  | C21  | -120.2(4)  | C49              | C44 | C45 | C46 | -0.2(17)  |           |
| C14 As2              | C20  | C25  | -168.3(5)  | As4              | C44 | C45 | C46 | 179.6(11) |           |
| C13 As2              | C20  | C25  | -60.4(5)   | P4               | C44 | C45 | C46 | 179.6(11) |           |
| Cu2 <sup>1</sup> As2 | C20  | C25  | 56.8(5)    | C44              | C45 | C46 | C47 | -1(2)     |           |
| C25 C20              | C21  | C22  | 0.0        | C45              | C46 | C47 | C48 | 2(2)      |           |
| As2 C20              | C21  | C22  | 177.0(5)   | C46              | C47 | C48 | C49 | -0.4(16)  |           |
| C20 C21              | C22  | C23  | 0.0        | C45              | C44 | C49 | C48 | 1.5(12)   |           |
| C21 C22              | C23  | C24  | 0.0        | As4              | C44 | C49 | C48 | -178.3(6) |           |
| C22 C23              | C24  | C25  | 0.0        | P4               | C44 | C49 | C48 | -178.3(6) |           |
| C23 C24              | C25  | C20  | 0.0        | C47              | C48 | C49 | C44 | -1.2(13)  |           |
| C21 C20              | C25  | C24  | 0.0        | C55              | C50 | C51 | C52 | 0.0(12)   |           |
| As2 C20              | C25  | C24  | -177.0(5)  | P4               | C50 | C51 | C52 | 177.1(7)  |           |
| C14 P2               | C20B | C21B | -77.8(13)  | As4              | C50 | C51 | C52 | 177.1(7)  |           |
| C13 P2               | C20B | C21B | 30.1(13)   | C50              | C51 | C52 | C53 | 0.6(14)   |           |
| Cu2 <sup>1</sup> P2  | C20B | C21B | 147.2(12)  | C51              | C52 | C53 | C54 | -0.6(15)  |           |
| C14 P2               | C20B | C25B | 118.6(10)  | C52              | C53 | C54 | C55 | -0.1(15)  |           |
| C13 P2               | C20B | C25B | -133.6(10) | C53              | C54 | C55 | C50 | 0.8(14)   |           |
| Cu2 <sup>1</sup> P2  | C20B | C25B | -16.4(10)  | C51              | C50 | C55 | C54 | -0.7(12)  |           |
| C25B                 | C20B | C21B | C22B       | -11(3)           | P4  | C50 | C55 | C54       | -177.6(6) |
| P2                   | C20B | C21B | C22B       | -175.6(16)       | As4 | C50 | C55 | C54       | -177.6(6) |

<sup>1</sup>1-X,1-Y,1-Z



### III. SEM pictures

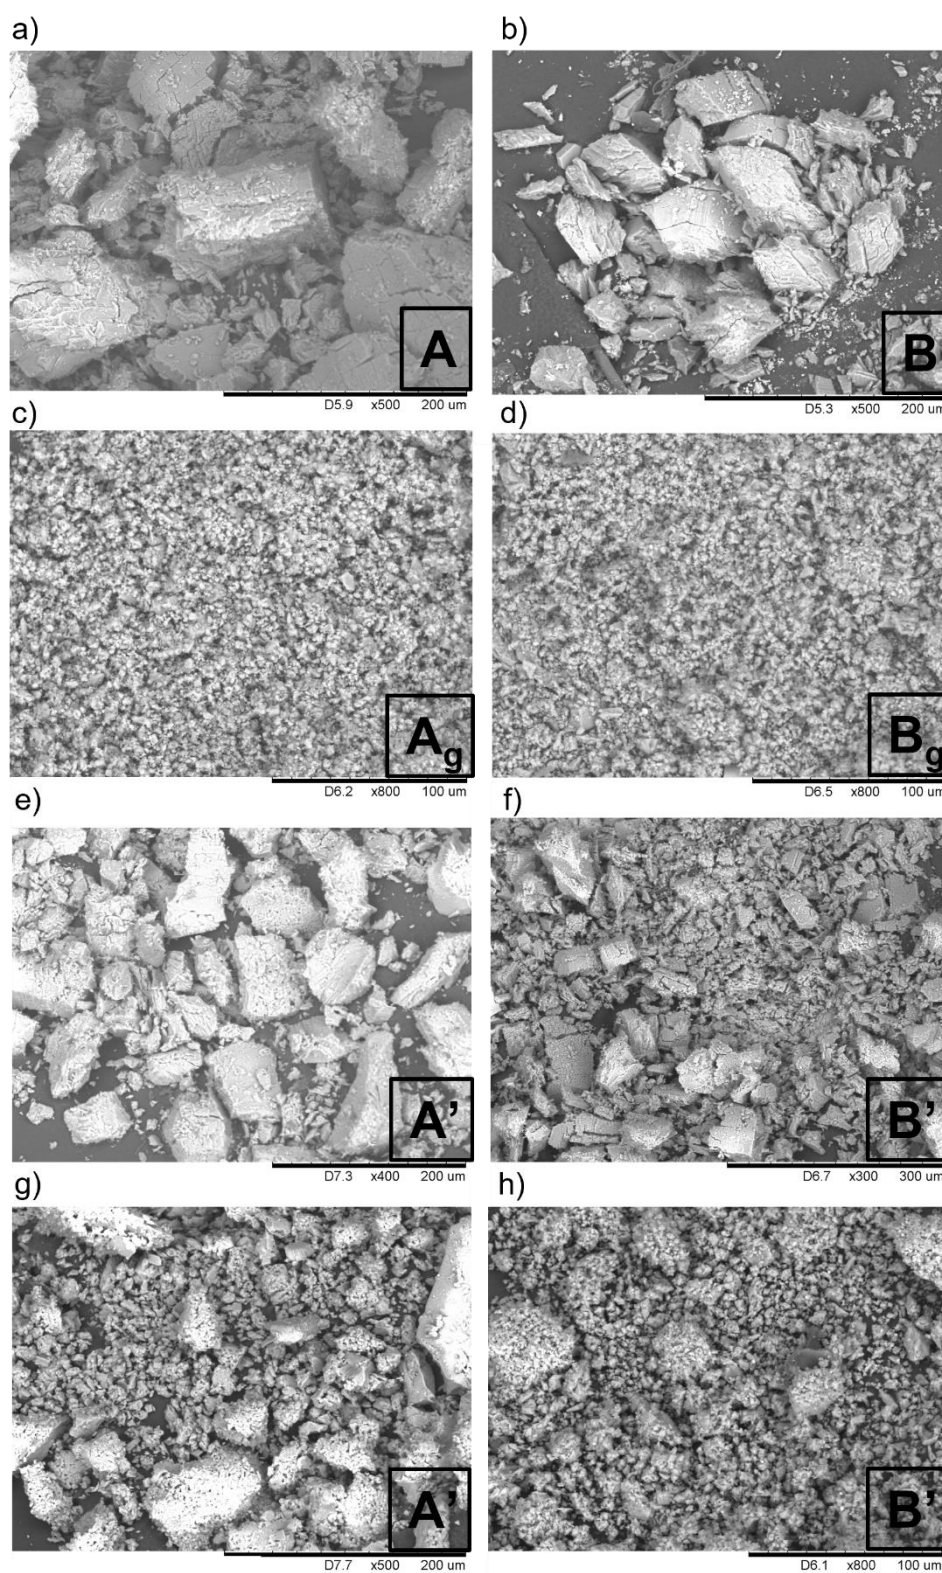

**Fig. S11.** SEM pictures of derivatives **A** (a), **A<sub>g</sub>** (c), **A'** generated from **A** (e) and **A'** generated from **A<sub>g</sub>** (g) and **B** (b), **B<sub>g</sub>** (d), **B'** generated from **B** (f) and **B'** generated from **B<sub>g</sub>** (h) taken at magnification ranging in between 250 and 800.

## IV. Photophysical study

### IV.1. Sample pictures

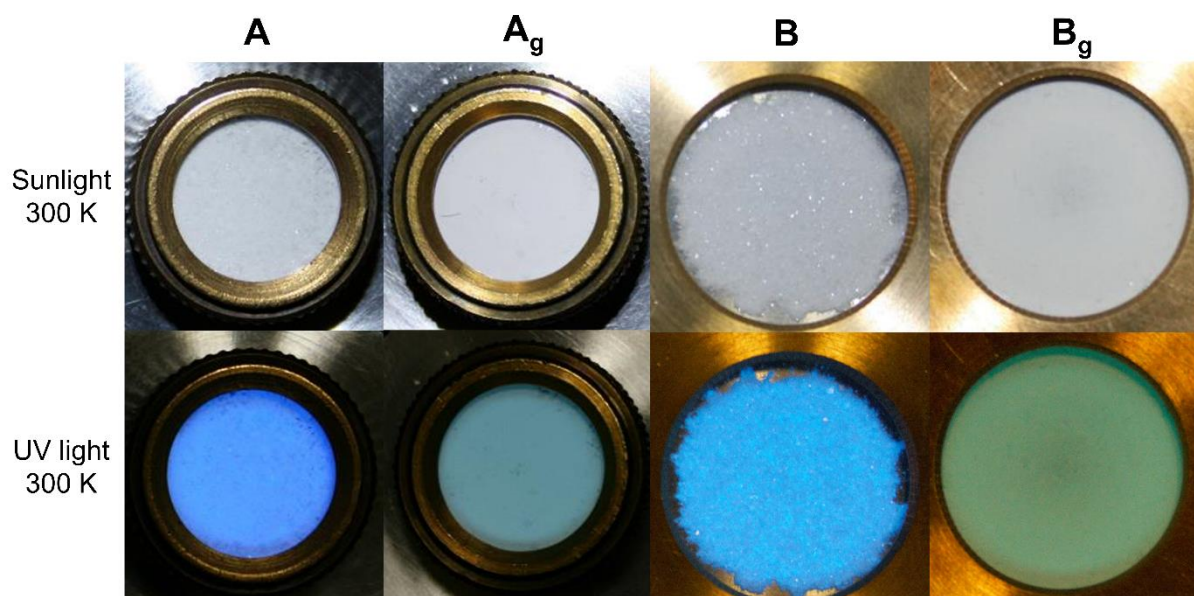

**Fig. S12.** Pictures of compound **A**, **A<sub>g</sub>**, **B** and **B<sub>g</sub>** under sunlight and UV light ( $\lambda_{\text{ex}} = 365 \text{ nm}$ ) at 300 K

IV.2. Absorbance:

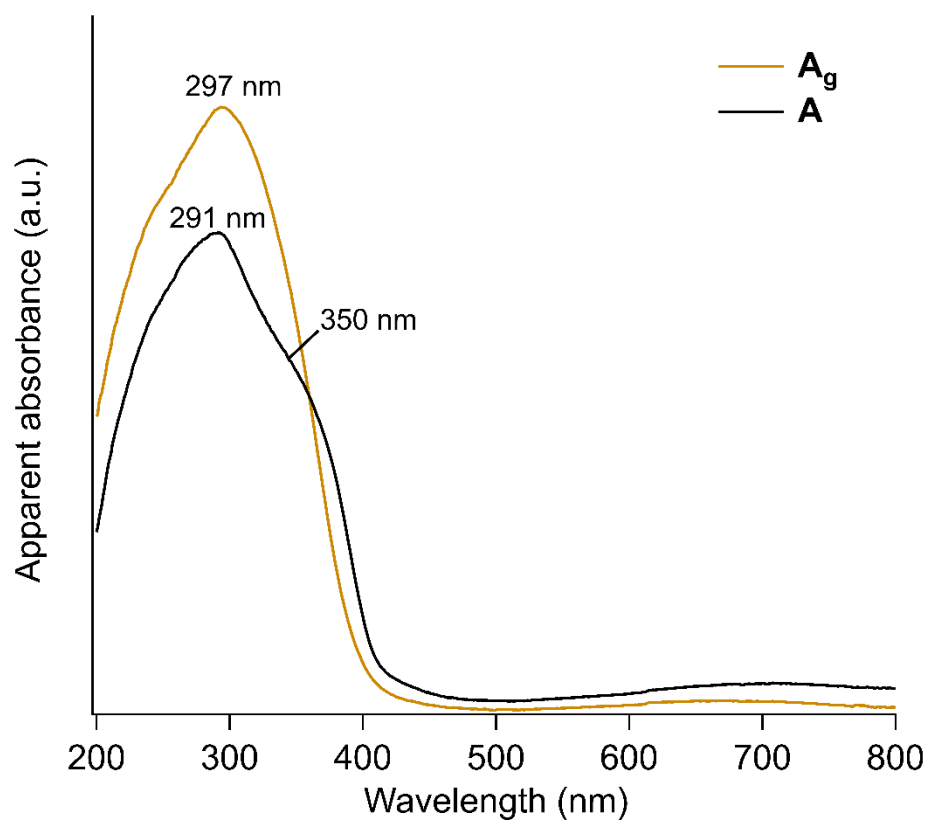

Fig. S13. Solid-state UV-Vis apparent absorbance spectra of derivatives  $A$  and  $A_g$  at 300 K.

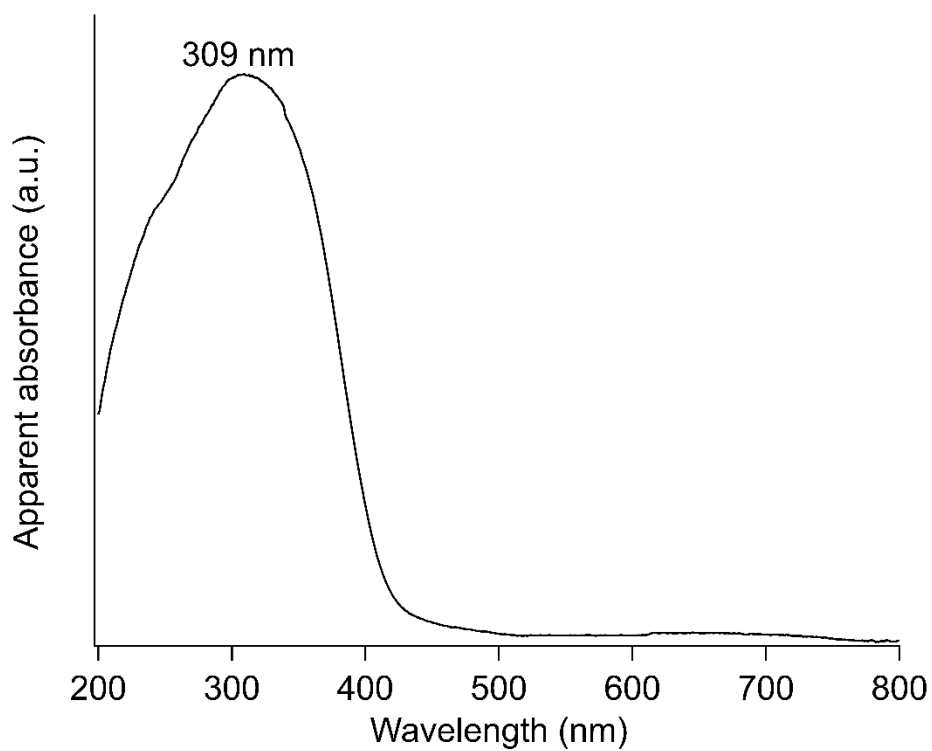

Fig. S14. Solid-state UV-Vis apparent absorbance spectra of derivative  $B_g$  at 300 K.

IV.3. Excitation spectra:

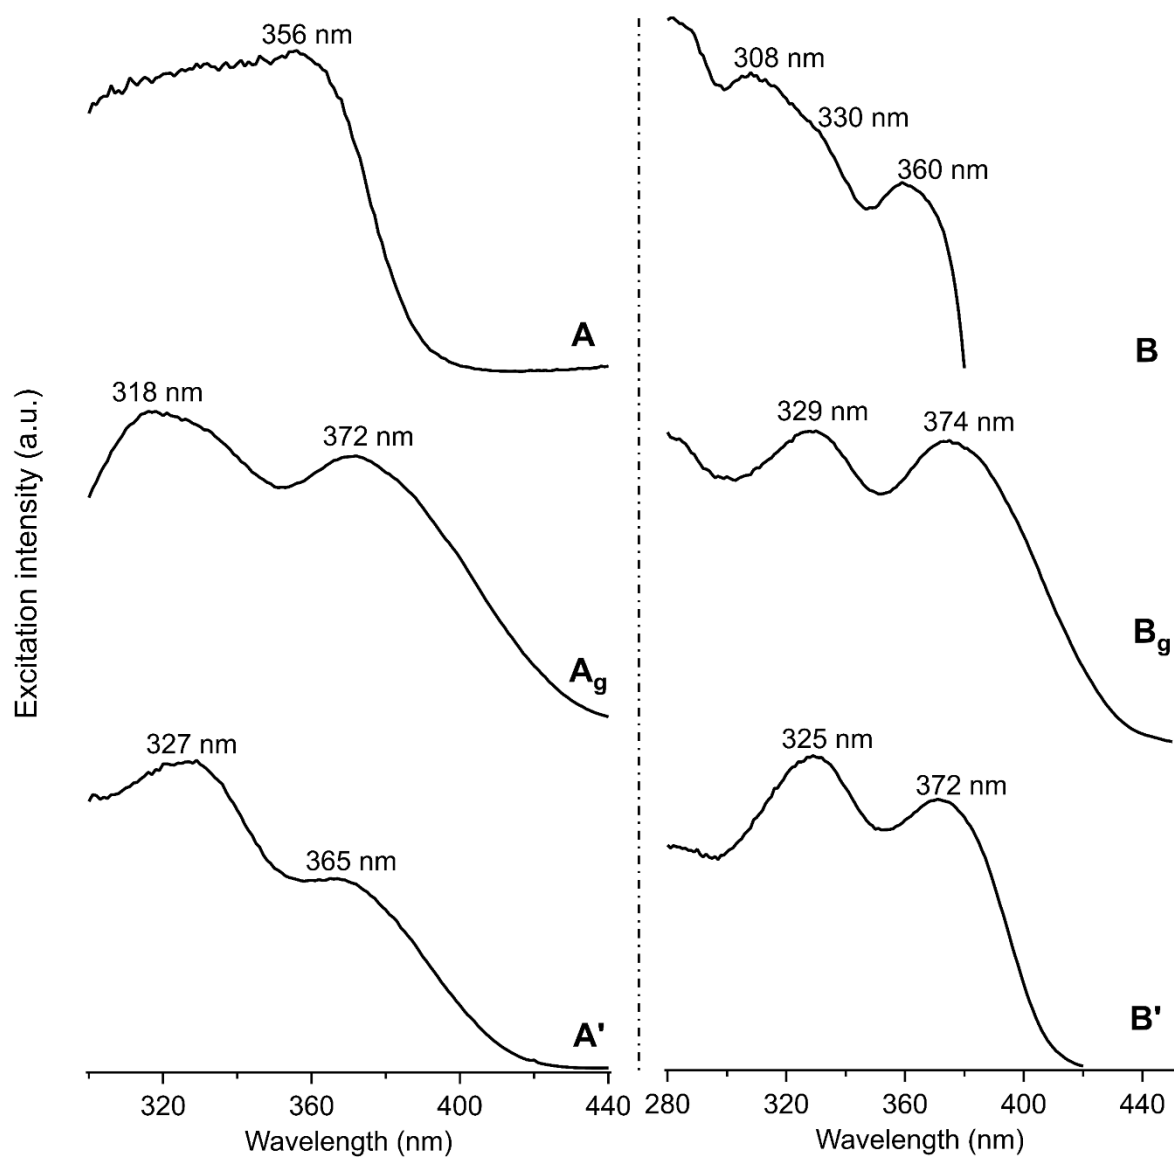

**Fig. S15.** Excitation spectra of derivatives **A**, **A<sub>g</sub>** and **A'** at room temperature (left) and excitation spectra of derivatives **B<sup>2</sup>** (80K), **B<sub>g</sub>** (300K) and **B'** (300K) (right) measured at the maximum of emission for each compound.

#### IV.4. Emission spectra:

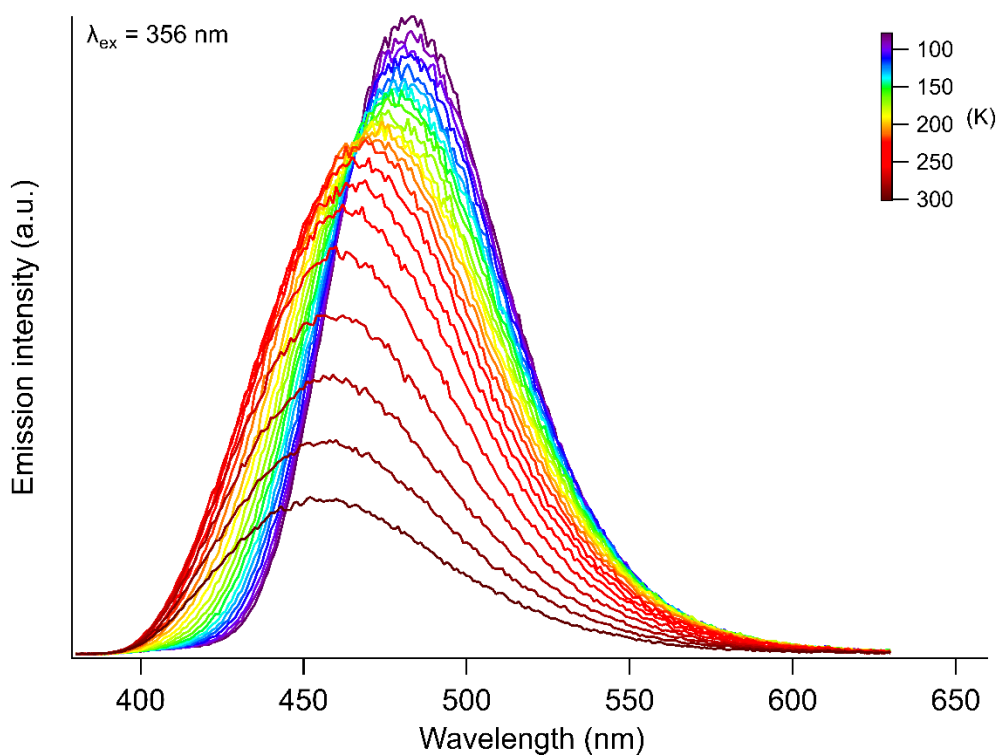

**Fig. S16.** Temperature dependent emission spectra of derivative **A** upon excitation at 356 nm (80–300 K).

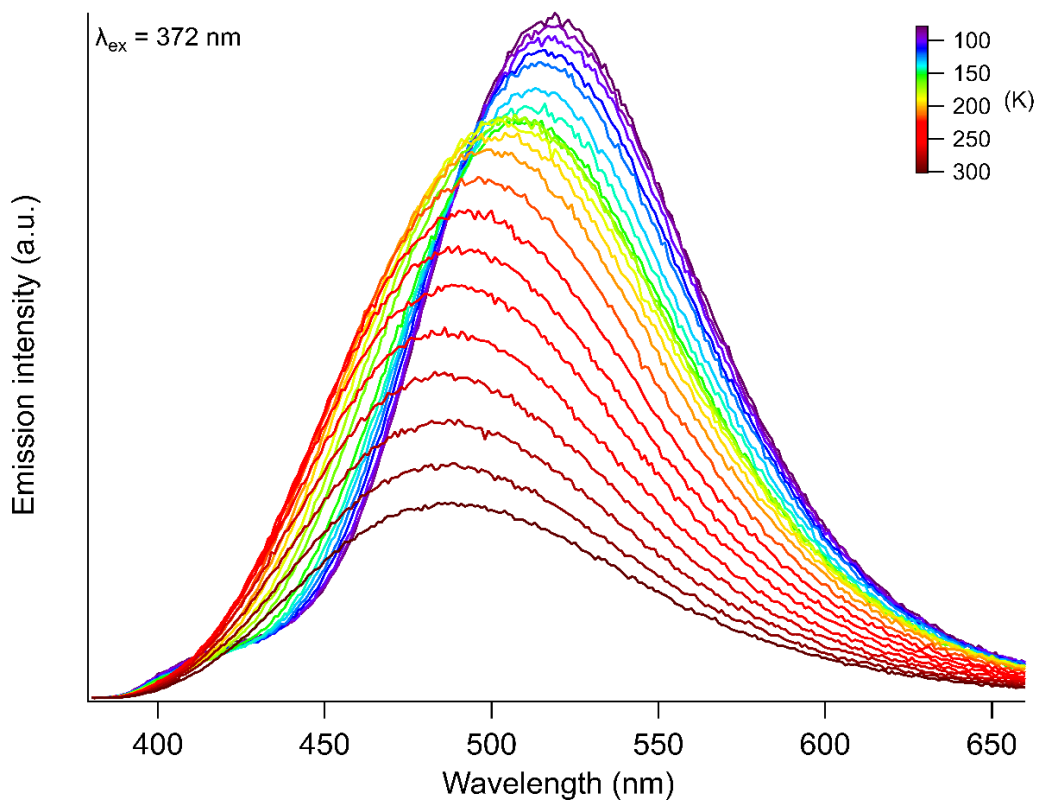

**Fig. S17.** Temperature dependent emission spectra of derivative **A<sub>g</sub>** upon excitation at 372 nm (80–300 K).

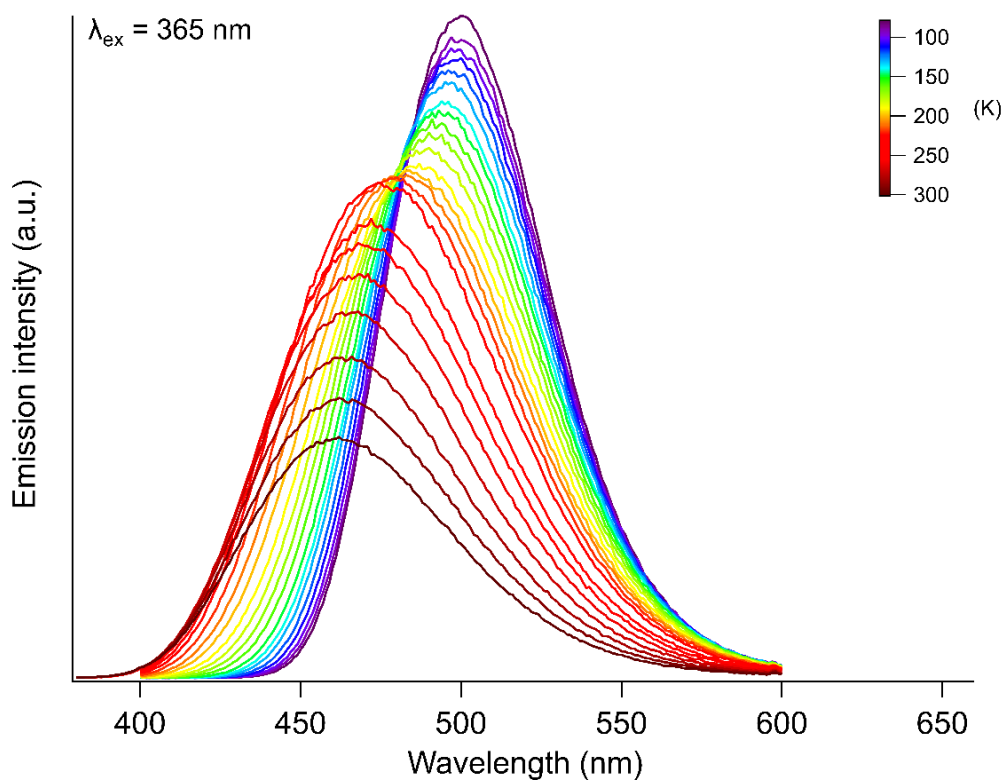

**Fig. S18.** Temperature dependent emission spectra of derivative **A'** upon excitation at 365 nm (80–300 K).

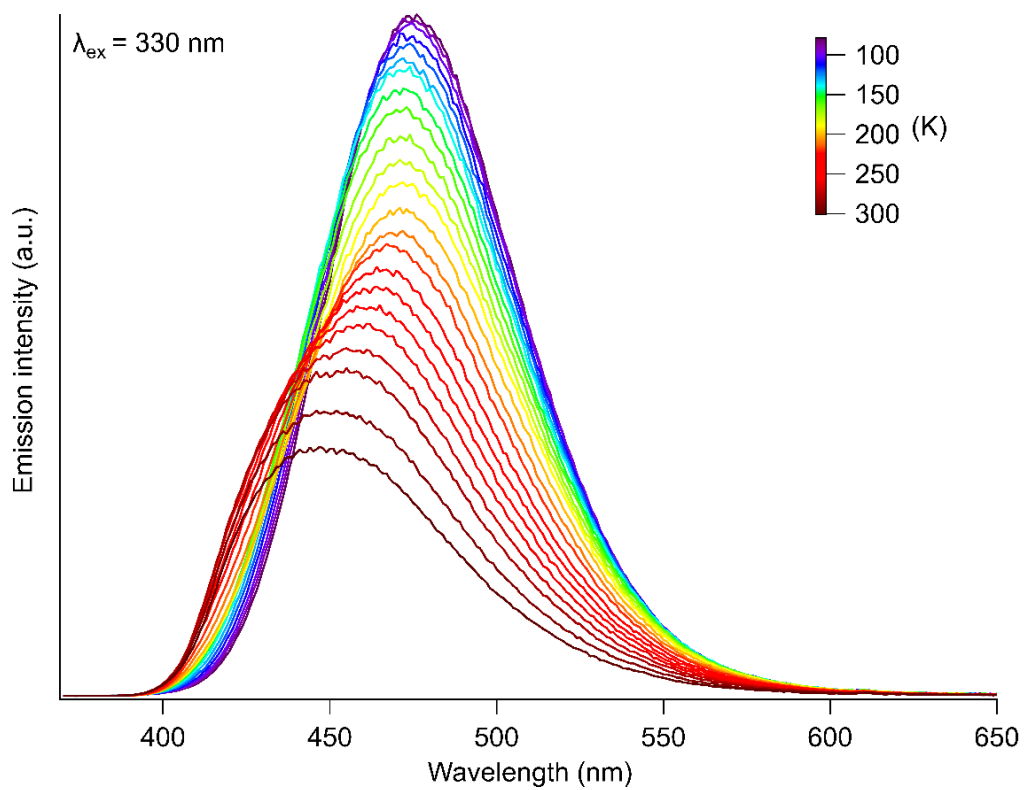

**Fig. S19.** Temperature dependent emission spectra of derivative **B<sup>2</sup>** upon excitation at 330 nm (80–300 K).

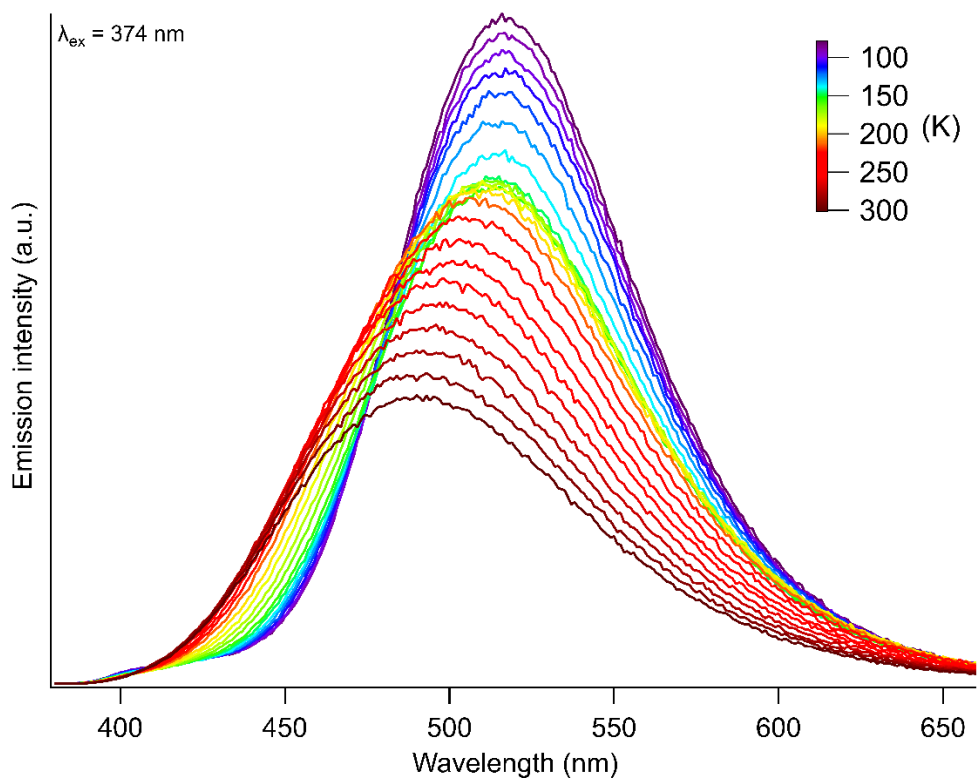

**Fig. S20.** Temperature dependent emission spectra of derivative  $B_g$  upon excitation at 374 nm (80–300 K).

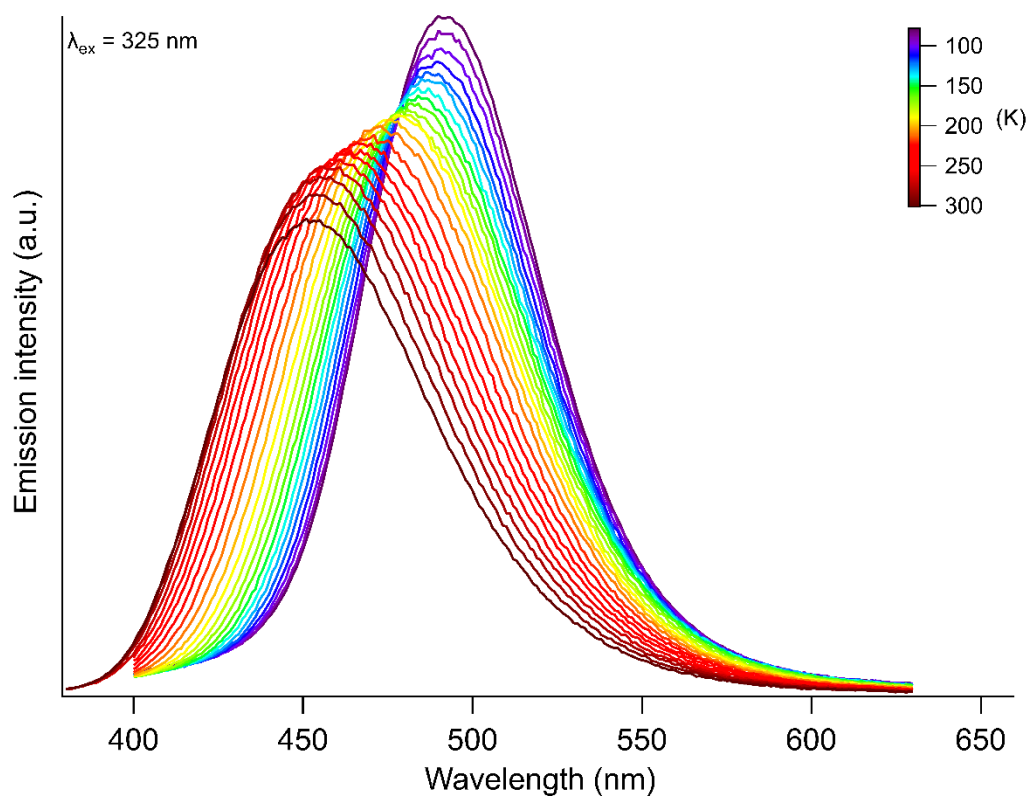

**Fig. S21.** Temperature dependent emission spectra of derivative  $B'$  upon excitation at 325 nm (80–300 K).

#### IV.5. Decay time:

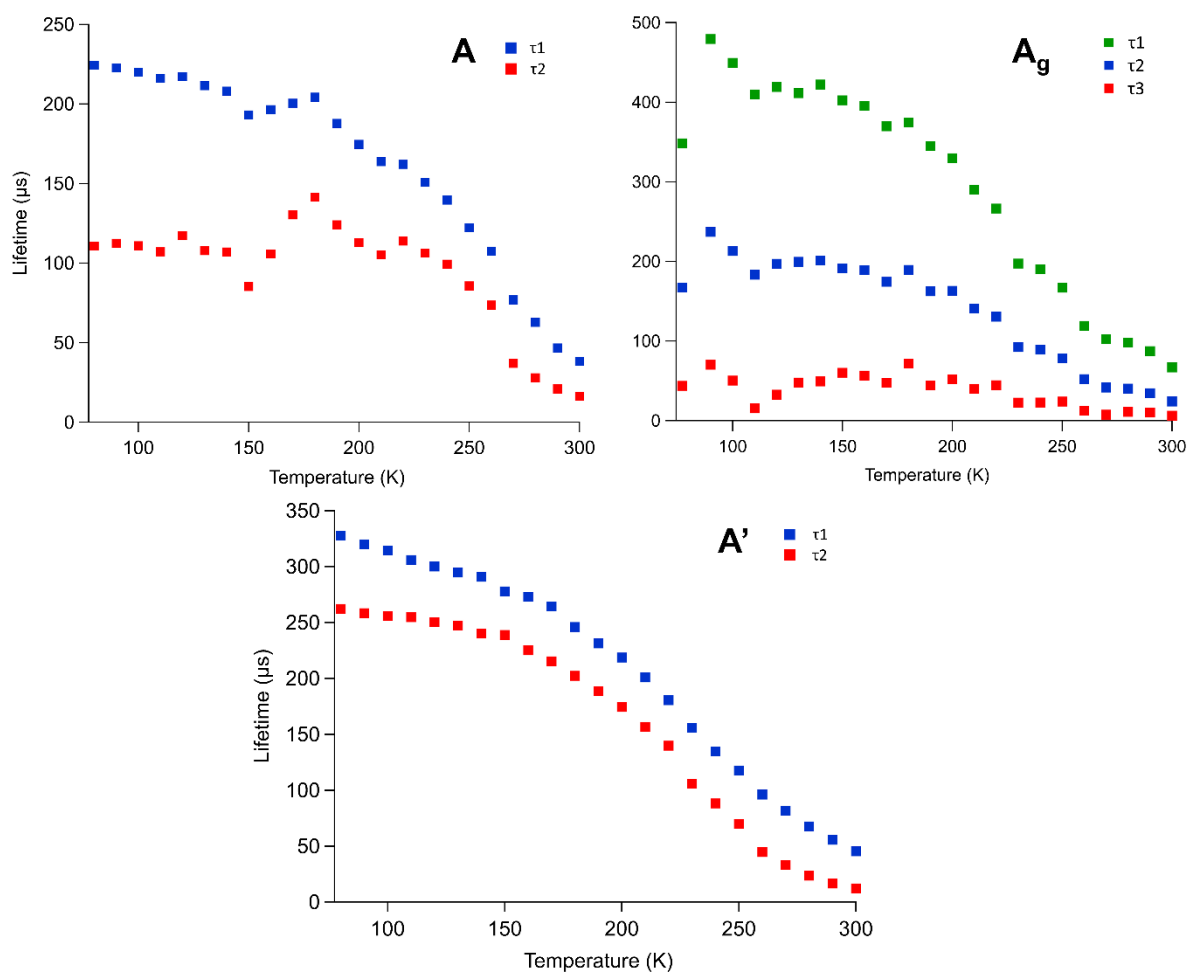

**Fig. S22.** Temperature dependent decay times of derivative **A** (biexponential),  **$A_g$**  (triexponential) and  **$A'$**  (biexponential) upon excitation at 375 nm (80–300 K)

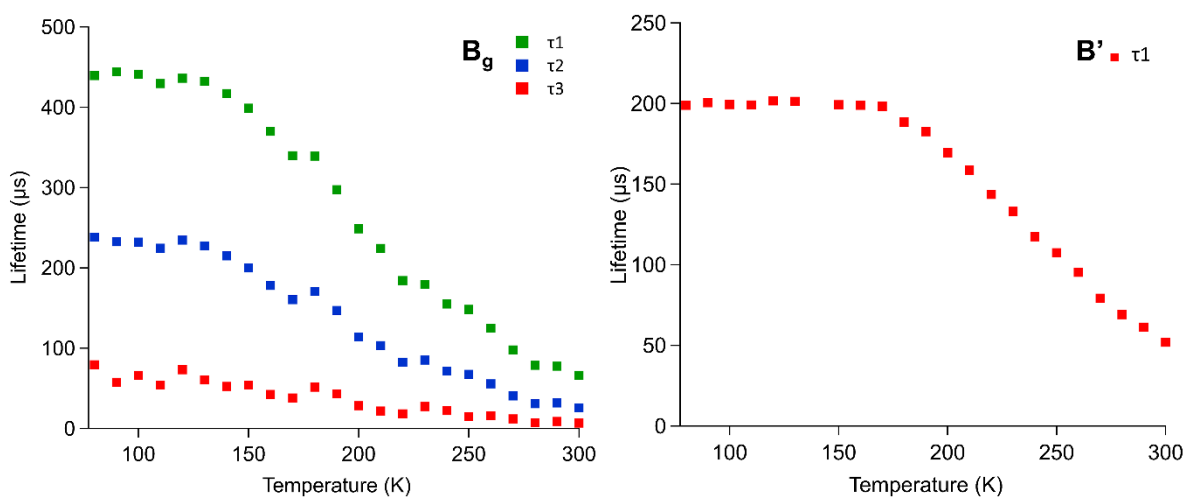

**Fig. S23.** Temperature dependent decay times of derivative  **$B_g$**  (triexponential) and  **$B'$**  (monoexponential) upon excitation at 375 nm (80–300 K)



IV.6. CIE coordinates:

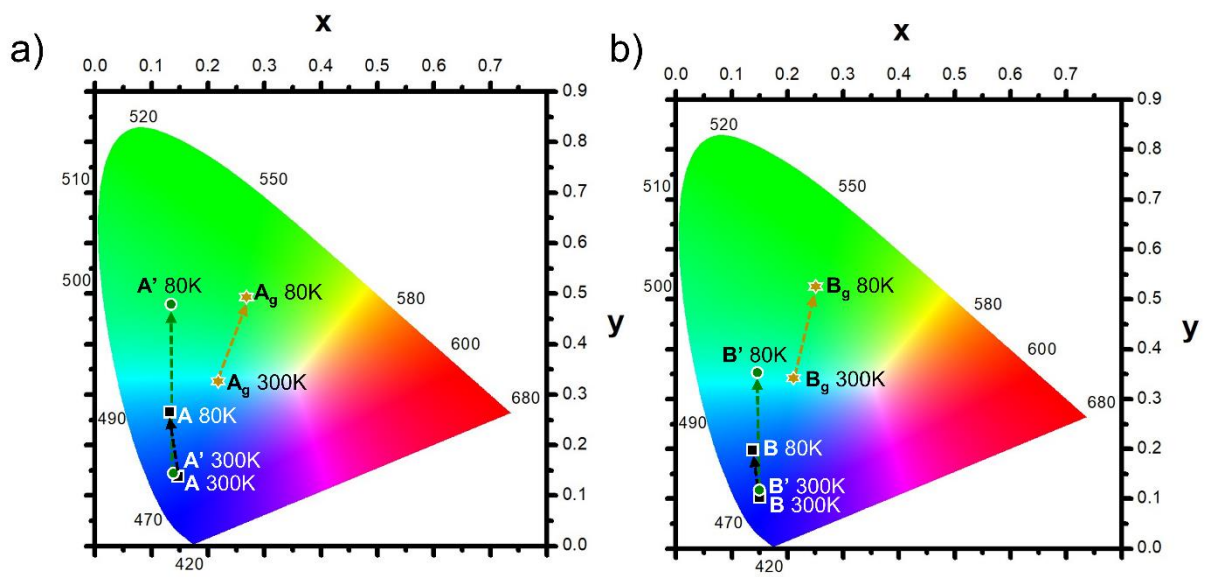

Fig. S24. CIE coordinates at 80 K and 300 K: a) **A** ( $\lambda_{ex} = 356$  nm), **A<sub>g</sub>** ( $\lambda_{ex} = 372$  nm) and **A'** ( $\lambda_{ex} = 365$  nm); b) **B<sup>2</sup>** ( $\lambda_{ex} = 330$  nm), **B<sub>g</sub>** ( $\lambda_{ex} = 374$  nm) and **B'** ( $\lambda_{ex} = 325$  nm).

## V. Thermogravimetric analyses:

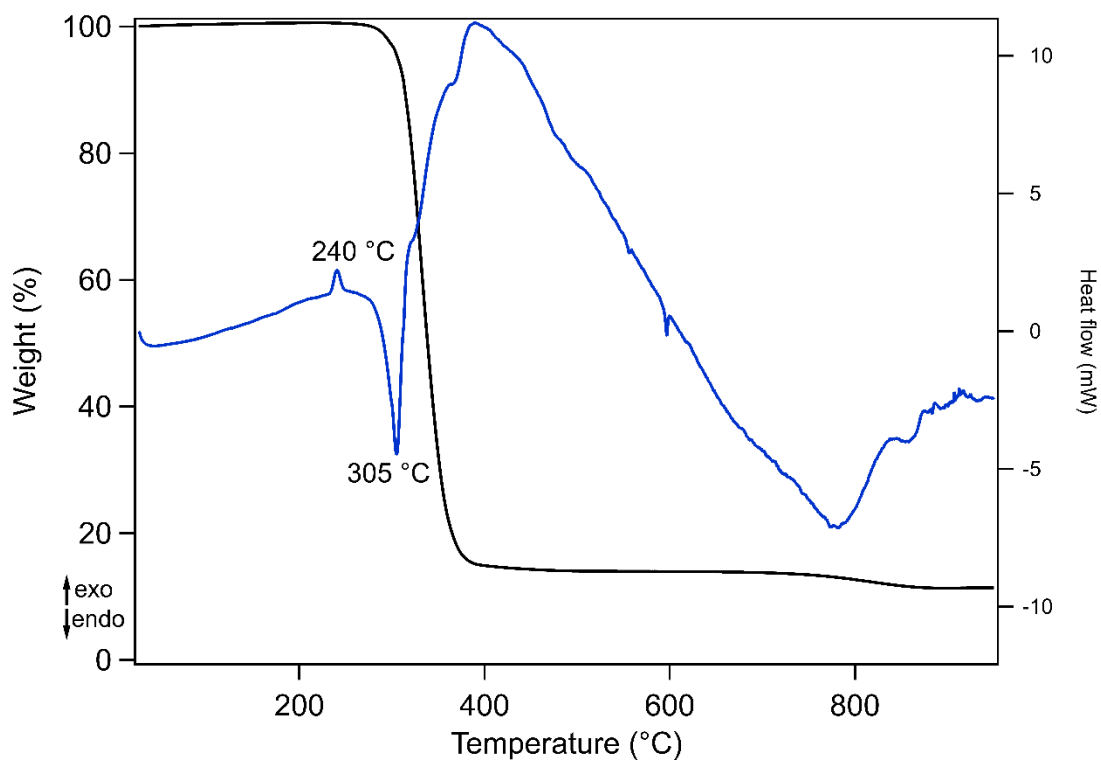

**Fig. S25.** TGA-TDA analysis curves of derivative **A** showing the weight loss (black curve, left axis) and the heat flow (blue curve, right axis) from 25 to 950 °C

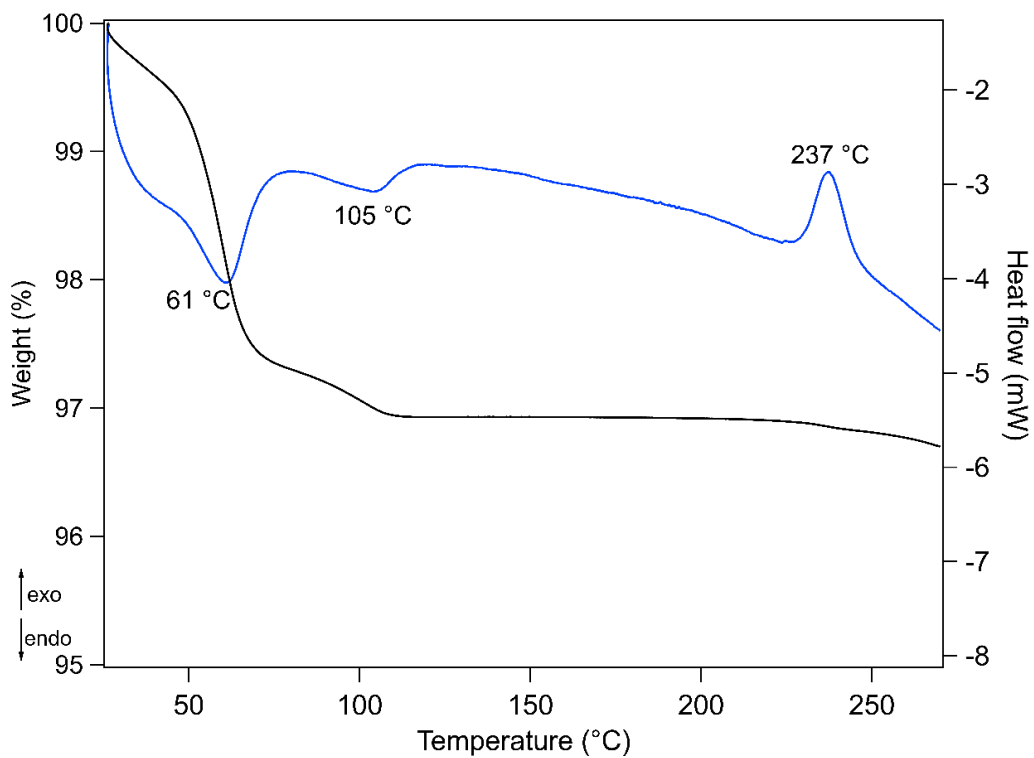

**Fig. S26.** TGA-TDA analysis curves of derivative **A** showing the weight loss (black curve, left axis) and the heat flow (blue curve, right axis) from 25 to 270 °C

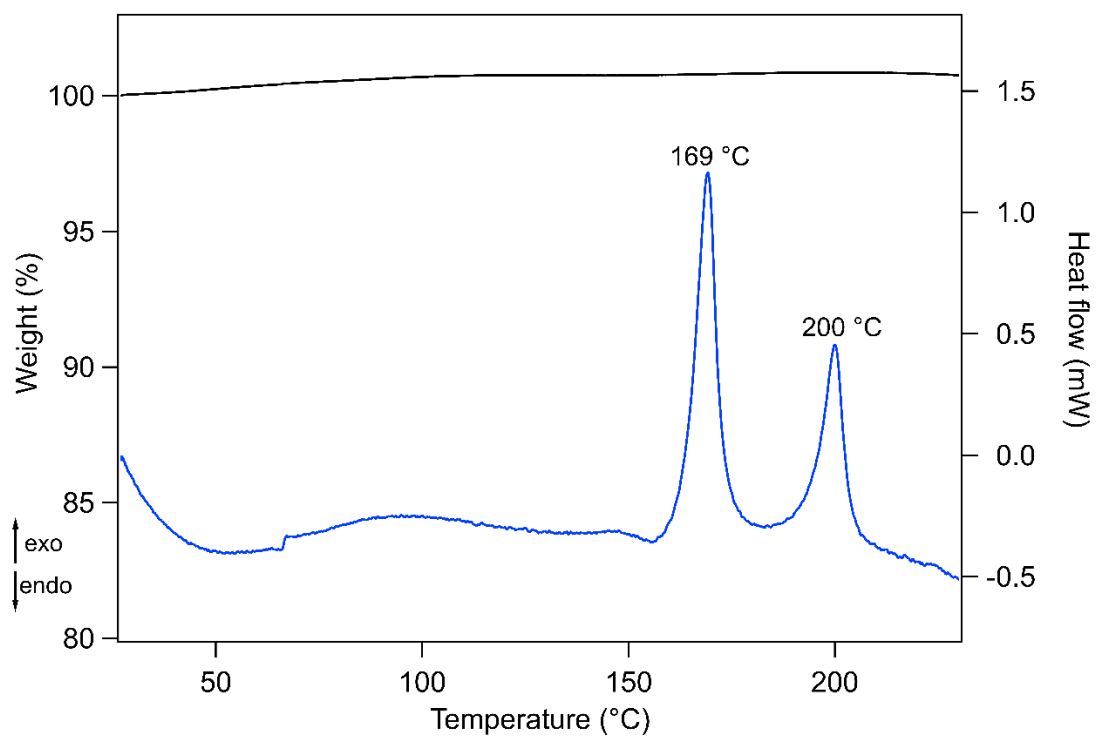

**Fig. S27.** TGA-TDA analysis curves of derivative **A<sub>g</sub>** showing the weight loss (black curve, left axis) and the heat flow (blue curve, right axis) from 25 to 230 °C

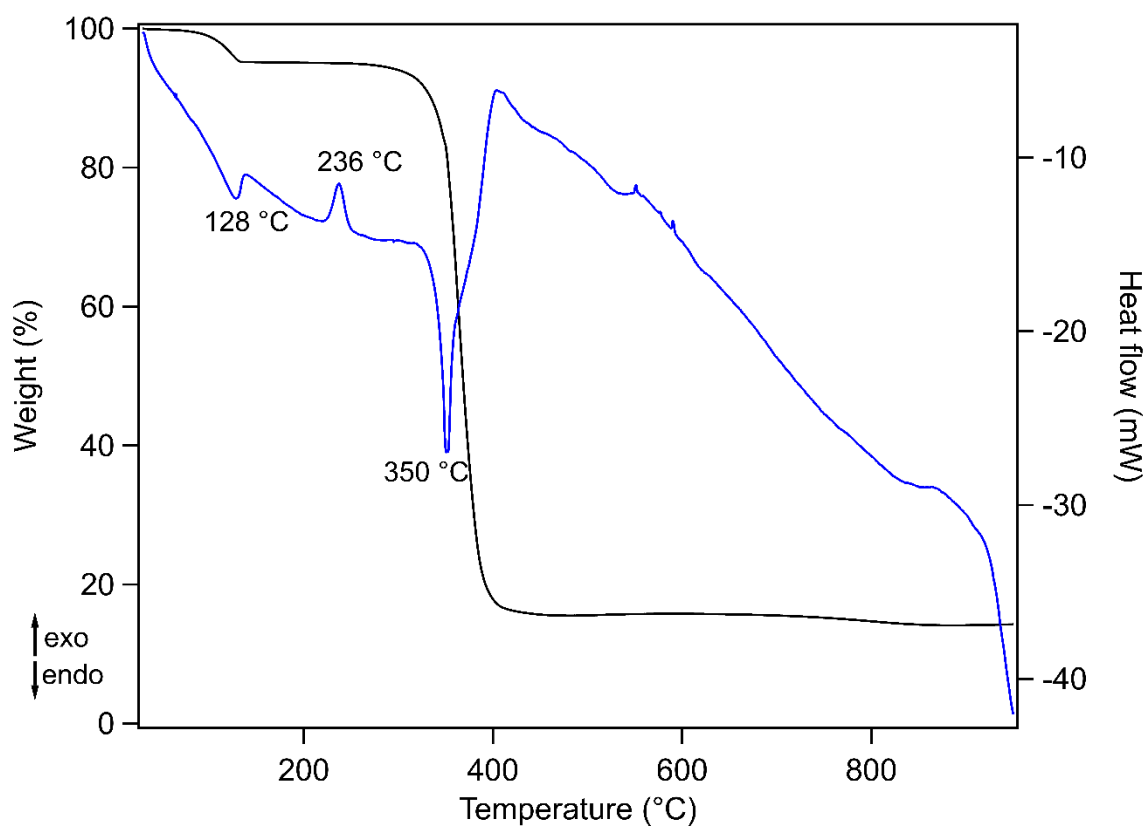

**Fig. S28.** TGA-TDA analysis curves of derivative **B** showing the weight loss (black curve, left axis) and the heat flow (blue curve, right axis) from 25 to 950 °C

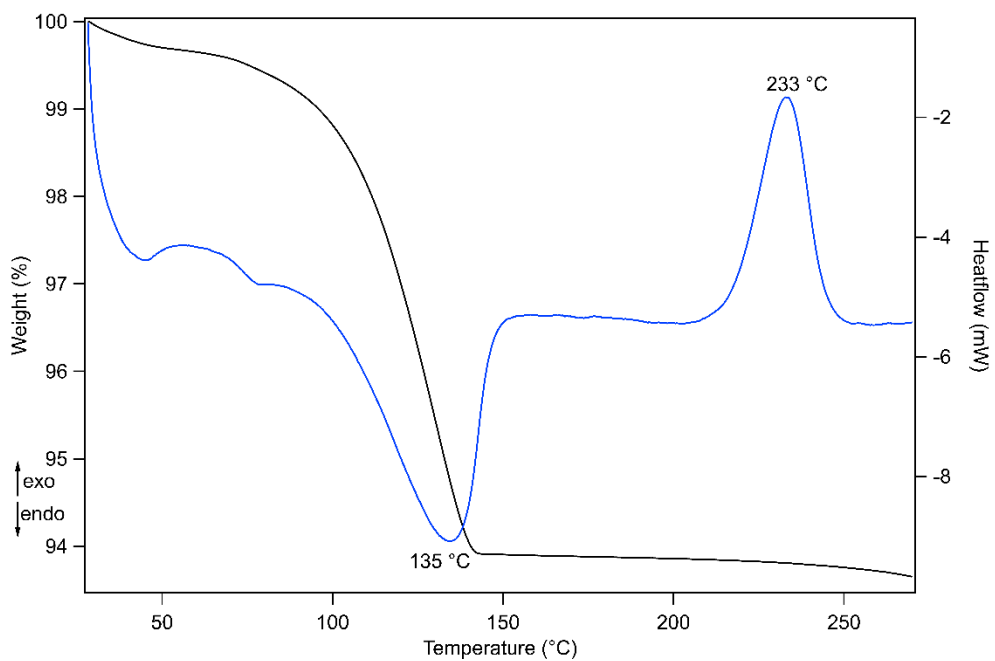

**Fig. S29.** TGA-TDA analysis curves of derivative **B** showing the weight loss (black curve, left axis) and the heat flow (blue curve, right axis) from 25 to 270 °C

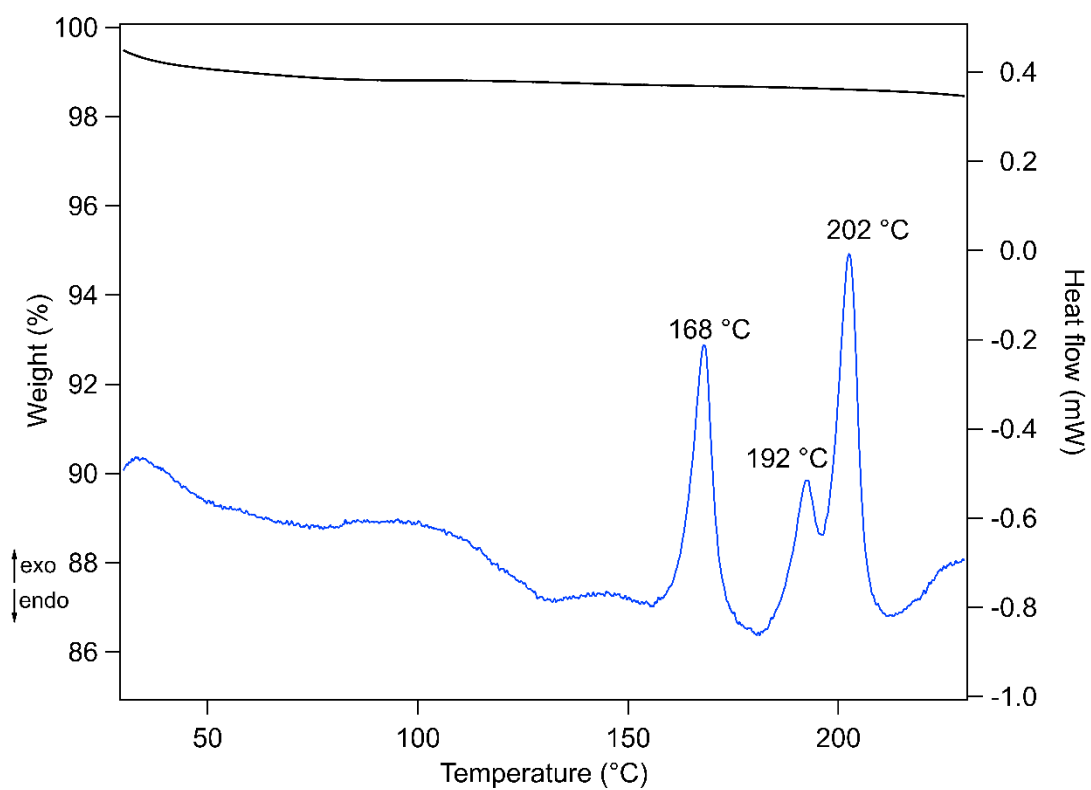

**Fig. S30.** TGA-TDA analysis curves of derivative **B<sub>g</sub>** showing the weight loss (black curve, left axis) and the heat flow (blue curve, right axis) from 25 to 230 °C

## VI. Computational details

DFT calculations were carried out with the ORCA 5.0 program.<sup>4,5</sup> The different structures and states ( $S_0$ ,  $S_1$ ,  $T_1$ ) of **A** and **B** were optimized using PBE0<sup>6,7</sup> functional and SVP<sup>8,9</sup> atomic basis set. D3BJ dispersion correction was used. Analytic DFT for  $S_0$  and TD-DFT for  $S_1$ ,  $T_1$  gradients were employed. Harmonic vibrational frequency calculations were not realisable because of the size of the systems (2192 and 2136 basis functions for **A** and **B** respectively). Tighter criteria of energy convergence were applied to ensure high quality of calculations ( $10^{-6}$  a.u.). For the ground state systems, two geometry optimizations were performed starting from the X-Ray structural arrangements: 1) full geometry optimizations ( $\mathbf{A}_{\text{opt-full}}(S_0)$  and  $\mathbf{B}_{\text{opt-full}}(S_0)$ ) and 2) partially constrained geometry optimizations in which the copper positions were fixed in order to indirectly simulate the crystal packing ( $\mathbf{A}_{\text{opt-const}}(S_0)$  and  $\mathbf{B}_{\text{opt-const}}(S_0)$ ). The positioning of C *versus* N in the cyano ligands, and the positioning of the P and As in the  $\mathbf{L}_{\text{As,P}}$  picnogen ligands has been studied and the most stable arrangement shown in Fig. 2 was kept for the rest of the computational study. The  $S_1$  and  $T_1$  geometry optimizations were performed starting from the fully optimized and partially constrained optimized geometries ( $\mathbf{A}_{\text{opt-full}}(S_1)$ ,  $\mathbf{B}_{\text{opt-full}}(S_1)$ ,  $\mathbf{A}_{\text{opt-full}}(T_1)$ ,  $\mathbf{B}_{\text{opt-full}}(T_1)$ ). The cartesian coordinates are given in Table S4. The iso-surface representations were done using the GaussView program.<sup>10</sup> DFT 2-component spin-orbit coupling calculations were performed with the ORCA 5.0 package on the previously optimized  $S_0$ ,  $S_1$  and  $T_1$  structures. For these calculations the same hybrid functional PBE0 was used, with an all-electron triple-zeta Slater basis set with two additional polarization functions (Def2-TZVP) and ZORA approximation.<sup>11</sup> In order to be more accurate, SARC/J auxiliary basis set were also employed. Calculations relying on the Tamm-Dancoff approximation (TDA) of the full TD-DFT equations were used to evaluate the lifetime of the excited states and the oscillator strengths.<sup>12-14</sup> Calculated emission energies include spin-orbit coupling (SOC). Note that SOC was not included in the geometry optimizations. The direct fluorescence and phosphorescence radiative rate constants,  $k_r^f$  and  $k_r^{ph}$  respectively, were calculated employing the following equations which do not take into account rovibrational aspects:

$$k_r^f = \frac{2\pi\nu^2 e^2}{\epsilon_0 m c^3} \cdot f_{S_1 \rightarrow S_0}; k_r^{ph} = \frac{2\pi E^2 e^2}{\epsilon_0 h^2 m c^3} \cdot f_{T_1 \rightarrow S_0} \quad \text{Equation S2}$$

**Table S4.** Cartesian coordinates of all full or partial optimized structures.

| $A_{\text{opt-full}}(S_0)$ |           |           |           |    |           |           |           |
|----------------------------|-----------|-----------|-----------|----|-----------|-----------|-----------|
| Cu                         | 1.828606  | 2.578258  | 0.000000  | C  | 2.451825  | 1.337045  | 3.402941  |
| Cu                         | 6.844014  | 2.437637  | 0.051653  | H  | 2.562467  | 0.846882  | 2.433838  |
| As                         | 0.589657  | 3.164037  | -1.948997 | C  | -0.820668 | 2.826989  | 2.222661  |
| P                          | -0.521886 | 0.303866  | -2.483121 | H  | -1.176810 | 2.980472  | 3.251602  |
| P                          | 0.957817  | 3.220217  | 2.004198  | H  | -1.386305 | 3.484264  | 1.543473  |
| As                         | -1.186147 | 0.997810  | 1.632969  | C  | -0.650706 | -0.055689 | 3.155921  |
| C                          | 1.467196  | 4.542344  | -2.990420 | C  | -0.967053 | 0.324079  | 4.464874  |
| C                          | 2.672552  | 5.072016  | -2.521307 | H  | -1.578949 | 1.209713  | 4.654779  |
| H                          | 3.109192  | 4.698893  | -1.592572 | C  | -0.503743 | -0.430811 | 5.538698  |
| C                          | 3.322990  | 6.070110  | -3.247447 | H  | -0.744807 | -0.127822 | 6.559961  |
| H                          | 4.257840  | 6.493034  | -2.871298 | C  | 0.262068  | -1.574646 | 5.309471  |
| C                          | 2.779948  | 6.528261  | -4.446245 | H  | 0.621417  | -2.167492 | 6.153645  |
| H                          | 3.289431  | 7.308962  | -5.015925 | C  | 0.567380  | -1.961919 | 4.007159  |
| C                          | 1.575267  | 6.000027  | -4.915263 | H  | 1.167854  | -2.855109 | 3.829804  |
| H                          | 1.142892  | 6.367550  | -5.848666 | C  | 0.120134  | -1.199264 | 2.929719  |
| C                          | 0.913340  | 5.015757  | -4.185371 | H  | 0.386849  | -1.486061 | 1.908446  |
| H                          | -0.043467 | 4.628995  | -4.547221 | C  | -3.116091 | 1.002092  | 1.703431  |
| C                          | -1.120988 | 4.000066  | -1.597650 | C  | -3.805440 | 1.987044  | 0.986289  |
| C                          | -1.130040 | 5.035327  | -0.652913 | H  | -3.265646 | 2.754091  | 0.423734  |
| H                          | -0.200671 | 5.353381  | -0.171869 | C  | -5.197839 | 1.987888  | 0.970512  |
| C                          | -2.321478 | 5.678699  | -0.328538 | H  | -5.731076 | 2.764385  | 0.417080  |
| H                          | -2.314856 | 6.487017  | 0.406320  | C  | -5.905705 | 0.998841  | 1.654984  |
| C                          | -3.514272 | 5.294789  | -0.945399 | H  | -6.998006 | 1.000648  | 1.643443  |
| H                          | -4.448557 | 5.800900  | -0.692144 | C  | -5.218596 | 0.008637  | 2.355928  |
| C                          | -3.506830 | 4.273484  | -1.892977 | H  | -5.771095 | -0.766588 | 2.891654  |
| H                          | -4.433528 | 3.969830  | -2.385132 | C  | -3.823793 | 0.007710  | 2.384143  |
| C                          | -2.313920 | 3.625946  | -2.220910 | H  | -3.290177 | -0.764509 | 2.944160  |
| H                          | -2.337941 | 2.825308  | -2.961183 | N  | 3.779858  | 2.944335  | -0.056723 |
| C                          | 0.173509  | 1.814129  | -3.299340 | C  | 4.938390  | 2.796763  | -0.047597 |
| H                          | -0.484877 | 2.203210  | -4.089606 | Cu | 5.073534  | 0.390290  | 0.190391  |
| H                          | 1.134549  | 1.545223  | -3.761793 | Cu | 0.092185  | 0.504332  | -0.296720 |
| C                          | -2.268784 | 0.254534  | -2.975372 | P  | 6.253636  | -0.147244 | 2.060551  |
| C                          | -2.660690 | 0.340246  | -4.319752 | As | 7.390929  | 2.736974  | 2.356337  |
| H                          | -1.908301 | 0.385709  | -5.112486 | As | 5.975725  | -0.225806 | -1.921360 |
| C                          | -4.012574 | 0.356090  | -4.648803 | P  | 8.220248  | 1.878265  | -1.673391 |
| H                          | -4.317400 | 0.422382  | -5.695586 | C  | 5.435830  | -1.477164 | 3.010694  |
| C                          | -4.979526 | 0.280958  | -3.642520 | C  | 4.420887  | -2.209615 | 2.385674  |
| H                          | -6.039476 | 0.292478  | -3.906731 | H  | 4.092668  | -1.933188 | 1.381241  |
| C                          | -4.594665 | 0.184114  | -2.307205 | C  | 3.830173  | -3.287272 | 3.043845  |
| H                          | -5.344663 | 0.123218  | -1.515560 | H  | 3.055703  | -3.870150 | 2.539578  |
| C                          | -3.240760 | 0.170725  | -1.974209 | C  | 4.229444  | -3.621145 | 4.335997  |
| H                          | -2.936327 | 0.111859  | -0.927265 | H  | 3.765458  | -4.464094 | 4.853424  |
| C                          | 0.279010  | -1.067458 | -3.382118 | C  | 5.233627  | -2.885004 | 4.968079  |
| C                          | -0.455814 | -2.165633 | -3.843185 | H  | 5.553919  | -3.151064 | 5.977918  |
| H                          | -1.540812 | -2.193199 | -3.719769 | C  | 5.845018  | -1.825064 | 4.304609  |
| C                          | 0.195546  | -3.224581 | -4.475039 | H  | 6.651060  | -1.276622 | 4.798474  |
| H                          | -0.386225 | -4.074795 | -4.838220 | C  | 7.877565  | -0.912217 | 1.705293  |
| C                          | 1.577339  | -3.194777 | -4.653433 | C  | 7.891088  | -1.944599 | 0.754907  |
| H                          | 2.082202  | -4.021319 | -5.158403 | H  | 6.965033  | -2.243771 | 0.254895  |
| C                          | 2.314779  | -2.107052 | -4.184912 | C  | 9.073769  | -2.614079 | 0.456732  |
| H                          | 3.398179  | -2.073988 | -4.316381 | H  | 9.064533  | -3.421252 | -0.279463 |
| C                          | 1.672421  | -1.055737 | -3.538384 | C  | 10.260469 | -2.258693 | 1.103193  |
| H                          | 2.271859  | -0.224830 | -3.158986 | H  | 11.188698 | -2.786229 | 0.872143  |
| C                          | 1.044768  | 5.032913  | 2.177072  | C  | 10.252998 | -1.236821 | 2.049583  |
| C                          | 2.135024  | 5.683229  | 1.581192  | H  | 11.174413 | -0.950997 | 2.561692  |
| H                          | 2.903974  | 5.097482  | 1.070839  | C  | 9.066757  | -0.567241 | 2.354302  |
| C                          | 2.243723  | 7.070301  | 1.642441  | H  | 9.091566  | 0.225419  | 3.102690  |
| H                          | 3.097888  | 7.567566  | 1.177873  | C  | 6.587242  | 1.185354  | 3.270016  |
| C                          | 1.262676  | 7.820246  | 2.289936  | H  | 7.213396  | 0.863725  | 4.114804  |
| H                          | 1.343739  | 8.908746  | 2.330893  | H  | 5.609792  | 1.500535  | 3.666836  |
| C                          | 0.173912  | 7.180194  | 2.882420  | C  | 9.176559  | 2.802465  | 3.074813  |
| H                          | -0.595673 | 7.766088  | 3.390247  | C  | 9.416611  | 2.782258  | 4.454869  |
| C                          | 0.062830  | 5.791837  | 2.827024  | H  | 8.582651  | 2.776941  | 5.162751  |
| H                          | -0.802180 | 5.306551  | 3.285070  | C  | 10.725389 | 2.783875  | 4.930077  |
| C                          | 1.746392  | 2.542522  | 3.505159  | H  | 10.914115 | 2.768357  | 6.005861  |
| C                          | 1.624814  | 3.169632  | 4.751439  | C  | 11.794936 | 2.813901  | 4.032100  |
| H                          | 1.085628  | 4.116729  | 4.839134  | H  | 12.820334 | 2.818026  | 4.408803  |
| C                          | 2.201559  | 2.595674  | 5.881529  | C  | 11.556622 | 2.846578  | 2.659697  |
| H                          | 2.113525  | 3.094445  | 6.849254  | H  | 12.388925 | 2.874547  | 1.953530  |
| C                          | 2.886871  | 1.384936  | 5.777736  | C  | 10.247507 | 2.839939  | 2.178126  |
| H                          | 3.328052  | 0.930248  | 6.667802  | H  | 10.063309 | 2.849891  | 1.101298  |
| C                          | 3.005975  | 0.753016  | 4.541095  | C  | 6.505751  | 4.200399  | 3.260509  |
| H                          | 3.528719  | -0.201729 | 4.456646  | C  | 7.244967  | 5.310081  | 3.683406  |
|                            |           |           |           | H  | 8.331232  | 5.327448  | 3.565201  |

|                                            |           |           |           |   |           |           |           |
|--------------------------------------------|-----------|-----------|-----------|---|-----------|-----------|-----------|
| C                                          | 6.597229  | 6.395476  | 4.271832  | C | -1.131959 | 4.561702  | -1.311833 |
| H                                          | 7.180583  | 7.256540  | 4.605853  | C | -1.116206 | 5.934319  | -1.031528 |
| C                                          | 5.213892  | 6.377751  | 4.439852  | H | -0.176536 | 6.492230  | -1.053239 |
| H                                          | 4.708130  | 7.226102  | 4.906302  | C | -2.306683 | 6.592975  | -0.733075 |
| C                                          | 4.475651  | 5.275190  | 4.011568  | H | -2.291893 | 7.665410  | -0.526387 |
| H                                          | 3.392127  | 5.256307  | 4.137051  | C | -3.511702 | 5.889666  | -0.705280 |
| C                                          | 5.114197  | 4.191504  | 3.412746  | H | -4.444127 | 6.412690  | -0.481267 |
| H                                          | 4.511314  | 3.346561  | 3.067949  | C | -3.525678 | 4.520667  | -0.972892 |
| C                                          | 5.872171  | -2.132683 | -2.224195 | H | -4.464705 | 3.962781  | -0.961013 |
| C                                          | 4.696526  | -2.771550 | -1.809290 | C | -2.339376 | 3.851500  | -1.269804 |
| H                                          | 3.880453  | -2.189080 | -1.371737 | H | -2.372880 | 2.781155  | -1.480931 |
| C                                          | 4.558682  | -4.149470 | -1.962361 | C | 0.124572  | 2.364212  | -3.070596 |
| H                                          | 3.635241  | -4.640115 | -1.646525 | H | -0.574734 | 2.784635  | -3.808529 |
| C                                          | 5.596960  | -4.898436 | -2.515389 | H | 1.088938  | 2.189285  | -3.571669 |
| H                                          | 5.491711  | -5.979631 | -2.629202 | C | -2.199906 | 0.660100  | -2.660385 |
| C                                          | 6.772440  | -4.267067 | -2.920887 | C | -2.823547 | 1.209421  | -3.789692 |
| H                                          | 7.586432  | -4.852586 | -3.354593 | H | -2.231347 | 1.672248  | -4.583258 |
| C                                          | 6.912442  | -2.886599 | -2.777316 | C | -4.209814 | 1.169506  | -3.912312 |
| H                                          | 7.841208  | -2.407898 | -3.096562 | H | -4.689483 | 1.599787  | -4.794276 |
| C                                          | 5.189608  | 0.519203  | -3.524264 | C | -4.985131 | 0.581352  | -2.911031 |
| C                                          | 5.566691  | 0.067273  | -4.793043 | H | -6.072953 | 0.557782  | -3.008451 |
| H                                          | 6.290169  | -0.746283 | -4.898546 | C | -4.372252 | 0.022284  | -1.791394 |
| C                                          | 5.014215  | 0.648517  | -5.931623 | H | -4.970670 | -0.435282 | -1.000977 |
| H                                          | 5.309233  | 0.293290  | -6.921515 | C | -2.984975 | 0.060887  | -1.668580 |
| C                                          | 4.091055  | 1.687224  | -5.806934 | H | -2.501620 | -0.365677 | -0.786524 |
| H                                          | 3.668872  | 2.151139  | -6.701221 | C | 0.343066  | -0.432238 | -3.588095 |
| C                                          | 3.712937  | 2.138505  | -4.544478 | C | -0.378329 | -1.045638 | -4.617425 |
| H                                          | 3.010315  | 2.968845  | -4.447749 | H | -1.451016 | -0.869380 | -4.721560 |
| C                                          | 4.252049  | 1.549205  | -3.400407 | C | 0.273170  | -1.895783 | -5.510690 |
| H                                          | 3.953639  | 1.900490  | -2.409696 | H | -0.295422 | -2.375387 | -6.310673 |
| C                                          | 7.880106  | 0.135658  | -2.156572 | C | 1.640606  | -2.133834 | -5.384979 |
| H                                          | 8.237027  | -0.068706 | -3.176724 | H | 2.145934  | -2.798336 | -6.089465 |
| H                                          | 8.389919  | -0.533090 | -1.446938 | C | 2.360983  | -1.533586 | -4.351526 |
| C                                          | 7.906192  | 2.796527  | -3.213160 | H | 3.429762  | -1.726105 | -4.237893 |
| C                                          | 8.677027  | 2.562661  | -4.360926 | C | 1.713471  | -0.696909 | -3.448314 |
| H                                          | 9.527977  | 1.876756  | -4.321464 | H | 2.273992  | -0.252382 | -2.622365 |
| C                                          | 8.367522  | 3.212126  | -5.550963 | C | 0.932610  | 5.426162  | 1.808771  |
| H                                          | 8.970776  | 3.029706  | -6.443037 | C | 2.161632  | 6.031649  | 1.496463  |
| C                                          | 7.287021  | 4.095243  | -5.604060 | H | 3.033204  | 5.411139  | 1.269823  |
| H                                          | 7.043280  | 4.600317  | -6.541460 | C | 2.268354  | 7.416940  | 1.480330  |
| C                                          | 6.521242  | 4.333307  | -4.465959 | H | 3.226772  | 7.883414  | 1.242831  |
| H                                          | 5.669205  | 5.014678  | -4.509549 | C | 1.152051  | 8.207520  | 1.766820  |
| C                                          | 6.831538  | 3.688349  | -3.269681 | H | 1.236495  | 9.296395  | 1.751356  |
| H                                          | 6.224127  | 3.858794  | -2.376705 | C | -0.069095 | 7.609481  | 2.074379  |
| C                                          | 10.027328 | 1.932665  | -1.446320 | H | -0.939880 | 8.227676  | 2.303515  |
| C                                          | 10.691782 | 0.875085  | -0.813765 | C | -0.185609 | 6.220880  | 2.092677  |
| H                                          | 10.152008 | -0.020772 | -0.500666 | H | -1.148459 | 5.764613  | 2.329628  |
| C                                          | 12.057941 | 0.958680  | -0.557567 | C | 1.785466  | 3.057982  | 3.254038  |
| H                                          | 12.565857 | 0.122486  | -0.071871 | C | 1.735445  | 3.808807  | 4.436883  |
| C                                          | 12.770502 | 2.102291  | -0.916238 | H | 1.210328  | 4.767391  | 4.459399  |
| H                                          | 13.843650 | 2.164059  | -0.721581 | C | 2.356566  | 3.328597  | 5.586515  |
| C                                          | 12.109108 | 3.167443  | -1.527366 | H | 2.318529  | 3.914057  | 6.507618  |
| H                                          | 12.661273 | 4.066775  | -1.809077 | C | 3.021181  | 2.102482  | 5.561543  |
| C                                          | 10.743311 | 3.086666  | -1.791433 | H | 3.497927  | 1.724021  | 6.468574  |
| H                                          | 10.235828 | 3.922332  | -2.279772 | C | 3.074405  | 1.356570  | 4.384369  |
| N                                          | 3.131382  | -0.006730 | 0.083973  | H | 3.578357  | 0.387591  | 4.364636  |
| C                                          | 1.983037  | 0.159751  | -0.044233 | C | 2.466845  | 1.834174  | 3.225972  |
| <b>A<sub>opt-full</sub>(S<sub>1</sub>)</b> |           |           |           | H | 2.519162  | 1.245670  | 2.307869  |
| Cu                                         | 1.828606  | 2.578258  | 0.000000  | C | -0.849458 | 3.092894  | 1.961748  |
| Cu                                         | 6.822476  | 2.384796  | 0.159867  | H | -1.250140 | 3.347967  | 2.954365  |
| As                                         | 0.526988  | 3.665519  | -1.670099 | H | -1.426320 | 3.618034  | 1.184126  |
| P                                          | -0.401109 | 0.715201  | -2.378857 | C | -0.417492 | 0.383824  | 3.258384  |
| P                                          | 0.878057  | 3.625353  | 1.788834  | C | -0.833246 | 0.898259  | 4.490607  |
| As                                         | -0.994236 | 1.157640  | 1.580568  | H | -1.508936 | 1.756520  | 4.538191  |
| C                                          | 1.580262  | 4.998189  | -2.590819 | C | -0.397408 | 0.307666  | 5.673344  |
| C                                          | 2.855113  | 5.301984  | -2.104434 | H | -0.719517 | 0.714000  | 6.634748  |
| H                                          | 3.240206  | 4.790191  | -1.219499 | C | 0.438361  | -0.809350 | 5.629011  |
| C                                          | 3.639436  | 6.251226  | -2.759291 | H | 0.773924  | -1.275960 | 6.558012  |
| H                                          | 4.633434  | 6.491392  | -2.374254 | C | 0.839456  | -1.332667 | 4.402305  |
| C                                          | 3.154135  | 6.891698  | -3.898148 | H | 1.497361  | -2.202424 | 4.368237  |
| H                                          | 3.766820  | 7.637858  | -4.409475 | C | 0.417476  | -0.735317 | 3.215174  |
| C                                          | 1.880829  | 6.587729  | -4.384256 | H | 0.752790  | -1.126401 | 2.249940  |
| H                                          | 1.499016  | 7.093934  | -5.273738 | C | -2.917841 | 0.939587  | 1.722920  |
| C                                          | 1.089762  | 5.644810  | -3.732274 | C | -3.827948 | 1.985223  | 1.554131  |
| H                                          | 0.088314  | 5.423703  | -4.110760 | H | -3.484348 | 3.006962  | 1.384061  |
|                                            |           |           |           | C | -5.199613 | 1.732807  | 1.602674  |
|                                            |           |           |           | H | -5.906342 | 2.556535  | 1.476261  |

|    |           |            |           |                                            |           |           |           |
|----|-----------|------------|-----------|--------------------------------------------|-----------|-----------|-----------|
| C  | -5.667436 | 0.438886   | 1.820916  | C                                          | 4.150888  | 1.994779  | -5.503550 |
| H  | -6.741413 | 0.244695   | 1.864723  | H                                          | 3.732904  | 2.536690  | -6.354808 |
| C  | -4.759811 | -0.607850  | 1.993259  | C                                          | 3.754226  | 2.317168  | -4.208517 |
| H  | -5.120939 | -1.622629  | 2.175671  | H                                          | 3.045549  | 3.131747  | -4.042556 |
| C  | -3.390329 | -0.360302  | 1.941621  | C                                          | 4.287725  | 1.627626  | -3.119963 |
| H  | -2.685544 | -1.185104  | 2.085383  | H                                          | 3.975340  | 1.877408  | -2.104827 |
| N  | 3.747943  | 2.860670   | 0.222968  | C                                          | 7.932022  | 0.134830  | -2.062711 |
| C  | 4.906507  | 2.679471   | 0.199918  | H                                          | 8.274902  | -0.042310 | -3.092460 |
| Cu | 5.168403  | 0.272345   | 0.361680  | H                                          | 8.470146  | -0.535299 | -1.376172 |
| Cu | 0.342769  | 0.529423   | -0.255289 | C                                          | 7.963975  | 2.821967  | -3.084379 |
| P  | 6.356977  | -0.1110752 | 2.252830  | C                                          | 8.776506  | 2.627598  | -4.210284 |
| As | 7.536713  | 2.783968   | 2.409208  | H                                          | 9.627920  | 1.942901  | -4.162412 |
| As | 6.036465  | -0.249519  | -1.793033 | C                                          | 8.510009  | 3.316736  | -5.388557 |
| P  | 8.236653  | 1.875411   | -1.553844 | H                                          | 9.147466  | 3.166329  | -6.262721 |
| C  | 5.563071  | -1.368559  | 3.317791  | C                                          | 7.429883  | 4.199140  | -5.452477 |
| C  | 4.485872  | -2.098386  | 2.802379  | H                                          | 7.221066  | 4.736160  | -6.380475 |
| H  | 4.090055  | -1.857330  | 1.812395  | C                                          | 6.620214  | 4.395453  | -4.336708 |
| C  | 3.919840  | -3.128088  | 3.554082  | H                                          | 5.767673  | 5.075720  | -4.388428 |
| H  | 3.095583  | -3.711065  | 3.136117  | C                                          | 6.888593  | 3.711966  | -3.151955 |
| C  | 4.405932  | -3.415789  | 4.827538  | H                                          | 6.248459  | 3.851827  | -2.276320 |
| H  | 3.961133  | -4.222128  | 5.415391  | C                                          | 10.036628 | 1.950372  | -1.274382 |
| C  | 5.471545  | -2.679828  | 5.350298  | C                                          | 10.706083 | 0.885908  | -0.658523 |
| H  | 5.859707  | -2.909413  | 6.345249  | H                                          | 10.175769 | -0.026111 | -0.377674 |
| C  | 6.056921  | -1.668298  | 4.594856  | C                                          | 12.066743 | 0.981999  | -0.377853 |
| H  | 6.915291  | -1.126093  | 5.000019  | H                                          | 12.578049 | 0.140677  | 0.095202  |
| C  | 7.984140  | -0.873836  | 1.913418  | C                                          | 12.768678 | 2.144039  | -0.694552 |
| C  | 8.007150  | -1.880659  | 0.935590  | H                                          | 13.837948 | 2.214587  | -0.482118 |
| H  | 7.086465  | -2.155313  | 0.410631  | C                                          | 12.101381 | 3.217217  | -1.285130 |
| C  | 9.189924  | -2.552666  | 0.642272  | H                                          | 12.644667 | 4.131934  | -1.532212 |
| H  | 9.189846  | -3.342746  | -0.112500 | C                                          | 10.741475 | 3.124015  | -1.574199 |
| C  | 10.367642 | -2.220040  | 1.316682  | H                                          | 10.230408 | 3.965784  | -2.048053 |
| H  | 11.296530 | -2.747376  | 1.087555  | N                                          | 3.280248  | -0.230720 | 0.260683  |
| C  | 10.351448 | -1.221092  | 2.287366  | C                                          | 2.131402  | -0.017420 | 0.099306  |
| H  | 11.266716 | -0.954793  | 2.820520  |                                            |           |           |           |
| C  | 9.163937  | -0.553653  | 2.591555  | <b>A<sub>opt-full</sub>(T<sub>1</sub>)</b> |           |           |           |
| H  | 9.179364  | 0.218473   | 3.361655  | Cu                                         | 1.828605  | 2.578258  | 0.000000  |
| C  | 6.680387  | 1.301320   | 3.379817  | Cu                                         | 6.835819  | 2.270689  | 0.103828  |
| H  | 7.262526  | 1.022318   | 4.269869  | As                                         | 0.557901  | 3.599946  | -1.710749 |
| H  | 5.694424  | 1.657951   | 3.715103  | P                                          | -0.346648 | 0.615957  | -2.379746 |
| C  | 9.317598  | 2.807576   | 3.148015  | P                                          | 0.825212  | 3.576373  | 1.749622  |
| C  | 9.521173  | 2.753930   | 4.533564  | As                                         | -1.006537 | 1.074853  | 1.567756  |
| H  | 8.669398  | 2.733969   | 5.219408  | C                                          | 1.592400  | 4.919663  | -2.671738 |
| C  | 10.815321 | 2.742585   | 5.046021  | C                                          | 2.873229  | 5.235821  | -2.208986 |
| H  | 10.973257 | 2.699795   | 6.126045  | H                                          | 3.272059  | 4.743515  | -1.318541 |
| C  | 11.909398 | 2.795817   | 4.179359  | C                                          | 3.644884  | 6.174913  | -2.893004 |
| H  | 12.924224 | 2.790284   | 4.583682  | H                                          | 4.642593  | 6.427195  | -2.525598 |
| C  | 11.707771 | 2.864959   | 2.802936  | C                                          | 3.141411  | 6.792181  | -4.036916 |
| H  | 12.559341 | 2.912974   | 2.121556  | C                                          | 3.744083  | 7.531053  | -4.570338 |
| C  | 10.412397 | 2.868528   | 2.283478  | C                                          | 1.862398  | 6.475474  | -4.499059 |
| H  | 10.260454 | 2.908801   | 1.202953  | H                                          | 1.466040  | 6.964426  | -5.391901 |
| C  | 6.736748  | 4.334198   | 3.251971  | C                                          | 1.083495  | 5.543035  | -3.817804 |
| C  | 7.546202  | 5.395504   | 3.671180  | H                                          | 0.077147  | 5.312155  | -4.177350 |
| H  | 8.633906  | 5.320673   | 3.599210  | C                                          | -1.119020 | 4.473235  | -1.381277 |
| C  | 6.968871  | 6.552273   | 4.193151  | C                                          | -1.121068 | 5.843889  | -1.089709 |
| H  | 7.608645  | 7.373786   | 4.523558  | H                                          | -0.186326 | 6.410686  | -1.088181 |
| C  | 5.583370  | 6.655941   | 4.298482  | C                                          | -2.322969 | 6.489223  | -0.808901 |
| H  | 5.131654  | 7.559851   | 4.713607  | H                                          | -2.322174 | 7.559832  | -0.592944 |
| C  | 4.774940  | 5.601511   | 3.875310  | C                                          | -3.521966 | 5.774722  | -0.809573 |
| H  | 3.689593  | 5.676974   | 3.956891  | H                                          | -4.463233 | 6.287557  | -0.599116 |
| C  | 5.344131  | 4.445358   | 3.344421  | C                                          | -3.518300 | 4.407981  | -1.087718 |
| H  | 4.690321  | 3.637302   | 3.004807  | H                                          | -4.452202 | 3.841314  | -1.098217 |
| C  | 5.911992  | -2.122886  | -2.250456 | C                                          | -2.320189 | 3.752176  | -1.367296 |
| C  | 4.751837  | -2.793432  | -1.840797 | H                                          | -2.340006 | 2.683205  | -1.586015 |
| H  | 3.976276  | -2.258123  | -1.284155 | C                                          | 0.193181  | 2.253021  | -3.081532 |
| C  | 4.587605  | -4.144458  | -2.139624 | H                                          | -0.483642 | 2.658948  | -3.848405 |
| H  | 3.677878  | -4.661495  | -1.826608 | H                                          | 1.171778  | 2.071885  | -3.551905 |
| C  | 5.583691  | -4.835052  | -2.829797 | C                                          | -2.139281 | 0.547433  | -2.698144 |
| H  | 5.456202  | -5.895433  | -3.058300 | C                                          | -2.741450 | 1.081622  | -3.846342 |
| C  | 6.746546  | -4.173814  | -3.223189 | H                                          | -2.135509 | 1.551247  | -4.625397 |
| H  | 7.529511  | -4.715035  | -3.759583 | C                                          | -4.122532 | 1.014732  | -4.007833 |
| C  | 6.912943  | -2.819083  | -2.936330 | H                                          | -4.585368 | 1.433251  | -4.904313 |
| H  | 7.830096  | -2.315696  | -3.251528 | C                                          | -4.914159 | 0.412873  | -3.027572 |
| C  | 5.241491  | 0.628101   | -3.327049 | H                                          | -5.997903 | 0.366372  | -3.156350 |
| C  | 5.637339  | 0.305435   | -4.628900 | C                                          | -4.322449 | -0.130940 | -1.889371 |
| H  | 6.372497  | -0.485218  | -4.804142 | H                                          | -4.933549 | -0.599937 | -1.115607 |
| C  | 5.089263  | 0.984074   | -5.714141 | C                                          | -2.940273 | -0.063711 | -1.726699 |
| H  | 5.400413  | 0.727709   | -6.729244 |                                            |           |           |           |



|    |           |           |           |   |           |           |           |
|----|-----------|-----------|-----------|---|-----------|-----------|-----------|
| H  | -2.476435 | -0.478168 | -0.828934 | H | 7.056118  | -1.304944 | 4.882606  |
| C  | 0.405357  | -0.554878 | -3.562932 | C | 8.017590  | -0.973382 | 1.848843  |
| C  | -0.317475 | -1.205028 | -4.568580 | C | 8.043928  | -1.979922 | 0.870687  |
| H  | -1.391287 | -1.037542 | -4.673411 | H | 7.122952  | -2.262220 | 0.350365  |
| C  | 0.333452  | -2.080086 | -5.437775 | C | 9.230879  | -2.641443 | 0.570611  |
| H  | -0.237024 | -2.587228 | -6.219099 | H | 9.233630  | -3.430890 | -0.184793 |
| C  | 1.702498  | -2.307271 | -5.311957 | C | 10.409318 | -2.299076 | 1.239030  |
| H  | 2.208134  | -2.991067 | -5.997396 | H | 11.341485 | -2.818169 | 1.004574  |
| C  | 2.424483  | -1.670409 | -4.302150 | C | 10.389655 | -1.300943 | 2.210478  |
| H  | 3.494651  | -1.853767 | -4.188899 | H | 11.305285 | -1.026994 | 2.739106  |
| C  | 1.777438  | -0.808872 | -3.422256 | C | 9.198209  | -0.643539 | 2.520877  |
| H  | 2.340420  | -0.336247 | -2.614311 | H | 9.211260  | 0.129093  | 3.290489  |
| C  | 0.835653  | 5.379780  | 1.820945  | C | 6.702863  | 1.191544  | 3.321747  |
| C  | 2.050045  | 6.021478  | 1.522456  | H | 7.288111  | 0.915098  | 4.210624  |
| H  | 2.936945  | 5.427428  | 1.283458  | H | 5.714333  | 1.538903  | 3.660054  |
| C  | 2.124481  | 7.408880  | 1.533010  | C | 9.327134  | 2.718688  | 3.082198  |
| H  | 3.072557  | 7.902143  | 1.308012  | C | 9.538998  | 2.658425  | 4.466206  |
| C  | 0.988541  | 8.167905  | 1.828545  | H | 8.691251  | 2.628959  | 5.156755  |
| H  | 1.047251  | 9.258650  | 1.833364  | C | 10.836163 | 2.652007  | 4.971157  |
| C  | -0.219284 | 7.534899  | 2.117933  | H | 11.000516 | 2.604379  | 6.050009  |
| H  | -1.106096 | 8.127715  | 2.353096  | C | 11.925015 | 2.717041  | 4.098554  |
| C  | -0.302103 | 6.143463  | 2.112391  | H | 12.942139 | 2.715940  | 4.497024  |
| H  | -1.255492 | 5.661443  | 2.336262  | C | 11.715004 | 2.793108  | 2.723820  |
| C  | 1.735226  | 2.996212  | 3.210607  | H | 12.562291 | 2.850811  | 2.037868  |
| C  | 1.663997  | 3.723348  | 4.407194  | C | 10.416726 | 2.791691  | 2.211914  |
| H  | 1.126020  | 4.674449  | 4.443046  | H | 10.258373 | 2.836915  | 1.132512  |
| C  | 2.279512  | 3.228878  | 5.553988  | C | 6.730808  | 4.224174  | 3.201138  |
| H  | 2.222047  | 3.794766  | 6.486332  | C | 7.530017  | 5.285204  | 3.640143  |
| C  | 2.962913  | 2.013352  | 5.512703  | H | 8.618631  | 5.219094  | 3.574742  |
| H  | 3.434366  | 1.623334  | 6.417638  | C | 6.940644  | 6.430845  | 4.173088  |
| C  | 3.040037  | 1.292522  | 4.321598  | H | 7.572122  | 7.252423  | 4.518823  |
| H  | 3.557187  | 0.330509  | 4.288445  | C | 5.553835  | 6.523347  | 4.270243  |
| C  | 2.433996  | 1.782666  | 3.167751  | H | 5.093317  | 7.418581  | 4.694417  |
| H  | 2.497778  | 1.210161  | 2.240342  | C | 4.755439  | 5.469059  | 3.827440  |
| C  | -0.894997 | 3.012953  | 1.920500  | H | 3.668931  | 5.534835  | 3.902915  |
| H  | -1.299242 | 3.274953  | 2.910060  | C | 5.336771  | 4.324378  | 3.284889  |
| H  | -1.481141 | 3.519731  | 1.137527  | H | 4.691137  | 3.516417  | 2.930033  |
| C  | -0.464246 | 0.311874  | 3.262201  | C | 5.946447  | -2.234145 | -2.298630 |
| C  | -0.920239 | 0.818402  | 4.483221  | C | 4.810905  | -2.922572 | -1.851462 |
| H  | -1.604360 | 1.670789  | 4.513099  | H | 4.043534  | -2.398366 | -1.273781 |
| C  | -0.514970 | 0.226536  | 5.676373  | C | 4.658933  | -4.276871 | -2.142467 |
| H  | -0.868995 | 0.626307  | 6.629276  | H | 3.767873  | -4.807605 | -1.799872 |
| C  | 0.331149  | -0.883368 | 5.653413  | C | 5.643160  | -4.952755 | -2.863116 |
| H  | 0.642548  | -1.350181 | 6.590656  | H | 5.525270  | -6.015468 | -3.086203 |
| C  | 0.773290  | -1.398726 | 4.437488  | C | 6.782160  | -4.273670 | -3.294600 |
| H  | 1.439618  | -2.262944 | 4.419399  | H | 7.556111  | -4.803223 | -3.854990 |
| C  | 0.381350  | -0.800094 | 3.240726  | C | 6.936097  | -2.916117 | -3.014764 |
| H  | 0.748342  | -1.186504 | 2.285496  | H | 7.835033  | -2.399213 | -3.359018 |
| C  | -2.930469 | 0.826091  | 1.664795  | C | 5.261364  | 0.515105  | -3.387176 |
| C  | -3.853874 | 1.848826  | 1.438064  | C | 5.649071  | 0.180645  | -4.688482 |
| H  | -3.523735 | 2.872903  | 1.255665  | H | 6.377206  | -0.616723 | -4.861683 |
| C  | -5.221331 | 1.570685  | 1.443884  | C | 5.101536  | 0.855784  | -5.776194 |
| H  | -5.938331 | 2.377302  | 1.273249  | H | 5.406139  | 0.589692  | -6.790780 |
| C  | -5.672464 | 0.273198  | 1.675320  | C | 4.172429  | 1.875602  | -5.568646 |
| H  | -6.743417 | 0.058858  | 1.685479  | H | 3.755942  | 2.415665  | -6.421757 |
| C  | -4.751904 | -0.751198 | 1.903776  | C | 3.784036  | 2.209944  | -4.274216 |
| H  | -5.099926 | -1.768693 | 2.096194  | H | 3.084156  | 3.032727  | -4.110990 |
| C  | -3.386462 | -0.477607 | 1.896215  | C | 4.315808  | 1.523118  | -3.183119 |
| H  | -2.672457 | -1.285208 | 2.084931  | H | 4.006991  | 1.782653  | -2.169261 |
| N  | 3.766372  | 2.794707  | 0.166089  | C | 7.951256  | 0.034505  | -2.121794 |
| C  | 4.913966  | 2.557238  | 0.138319  | H | 8.292574  | -0.141805 | -3.152224 |
| Cu | 5.189826  | 0.163615  | 0.305666  | H | 8.492502  | -0.633896 | -1.435980 |
| Cu | 0.381676  | 0.461555  | -0.241174 | C | 7.974604  | 2.720416  | -3.146497 |
| P  | 6.386446  | -0.223464 | 2.195661  | C | 8.787404  | 2.523565  | -4.271863 |
| As | 7.543092  | 2.684139  | 2.352010  | H | 9.637844  | 1.837784  | -4.222646 |
| As | 6.056714  | -0.357784 | -1.850500 | C | 8.522519  | 3.211310  | -5.451221 |
| P  | 8.250360  | 1.776430  | -1.614747 | H | 9.159806  | 3.058437  | -6.324997 |
| C  | 5.609984  | -1.482432 | 3.272239  | C | 7.444135  | 4.095801  | -5.516609 |
| C  | 4.485877  | -2.172539 | 2.805165  | H | 7.236265  | 4.631867  | -6.445406 |
| H  | 4.051327  | -1.911634 | 1.837150  | C | 6.635187  | 4.295678  | -4.401106 |
| C  | 3.924578  | -3.190868 | 3.576093  | H | 5.783861  | 4.977376  | -4.454437 |
| H  | 3.061686  | -3.742642 | 3.195214  | C | 6.901566  | 3.613014  | -3.215305 |
| C  | 4.466383  | -3.509468 | 4.819254  | H | 6.262102  | 3.756696  | -2.339944 |
| H  | 4.026391  | -4.307899 | 5.421292  | C | 10.050572 | 1.861790  | -1.339536 |
| C  | 5.582733  | -2.816159 | 5.292128  | C | 10.731030 | 0.798802  | -0.733545 |
| H  | 6.015512  | -3.071616 | 6.261955  | H | 10.209570 | -0.119905 | -0.457913 |
| C  | 6.160030  | -1.814362 | 4.518160  | C | 12.091882 | 0.904796  | -0.456845 |

|                                             |           |           |           |    |           |           |           |
|---------------------------------------------|-----------|-----------|-----------|----|-----------|-----------|-----------|
| H                                           | 12.612337 | 0.064682  | 0.008149  | C  | 6.912869  | 3.697156  | 12.221773 |
| C                                           | 12.782678 | 2.075218  | -0.767127 | H  | 7.208114  | 3.125791  | 11.339356 |
| H                                           | 13.851867 | 2.153689  | -0.557199 | C  | 6.459531  | 3.009646  | 13.345964 |
| C                                           | 12.104314 | 3.146757  | -1.347858 | H  | 6.391057  | 1.919769  | 13.318727 |
| H                                           | 12.638728 | 4.068139  | -1.589752 | C  | 6.097133  | 3.708436  | 14.496731 |
| C                                           | 10.744442 | 3.043679  | -1.633192 | H  | 5.736140  | 3.168426  | 15.375019 |
| H                                           | 10.224638 | 3.884445  | -2.099285 | C  | 6.193763  | 5.099980  | 14.523958 |
| N                                           | 3.301994  | -0.362463 | 0.239624  | H  | 5.910715  | 5.651972  | 15.423054 |
| C                                           | 2.145351  | -0.203512 | 0.103071  | C  | 6.643679  | 5.793009  | 13.401193 |
| <b>A<sub>opt-const</sub>(S<sub>0</sub>)</b> |           |           |           | H  | 6.706954  | 6.884185  | 13.428463 |
| Cu                                          | 11.990382 | 8.902615  | 6.655630  | C  | 7.073483  | 5.026321  | 9.234591  |
| Cu                                          | 10.070242 | 6.335702  | 10.471699 | H  | 7.316889  | 3.970529  | 9.427708  |
| P                                           | 11.039984 | 10.702165 | 5.627455  | H  | 5.981501  | 5.143845  | 9.173332  |
| N                                           | 10.998956 | 6.101861  | 6.026897  | C  | 7.128516  | 7.075642  | 7.234597  |
| As                                          | 7.751998  | 6.059256  | 10.748363 | C  | 5.747845  | 7.140530  | 7.005909  |
| C                                           | 10.830582 | 7.499812  | 9.150713  | H  | 5.141228  | 6.231221  | 7.038186  |
| C                                           | 10.199889 | 11.787711 | 6.835464  | C  | 5.139793  | 8.359973  | 6.726328  |
| C                                           | 10.132918 | 11.392592 | 8.176116  | H  | 4.063257  | 8.402840  | 6.547633  |
| H                                           | 10.561438 | 10.435765 | 8.482224  | C  | 5.905282  | 9.525927  | 6.681428  |
| C                                           | 9.515884  | 12.216995 | 9.117102  | H  | 5.425596  | 10.485495 | 6.476179  |
| H                                           | 9.479664  | 11.910002 | 10.165206 | C  | 7.277984  | 9.467459  | 6.906544  |
| C                                           | 8.956459  | 13.430447 | 8.722615  | H  | 7.872537  | 10.383339 | 6.899635  |
| H                                           | 8.475096  | 14.077295 | 9.459748  | C  | 7.894279  | 8.244497  | 7.172146  |
| C                                           | 9.022222  | 13.828883 | 7.385401  | H  | 8.971219  | 8.201715  | 7.347116  |
| H                                           | 8.593902  | 14.785441 | 7.077825  | C  | 7.313359  | 4.284429  | 6.464518  |
| C                                           | 9.649124  | 13.016290 | 6.445807  | C  | 8.067250  | 4.106543  | 5.295302  |
| H                                           | 9.724442  | 13.349840 | 5.407039  | H  | 8.977483  | 4.692229  | 5.140421  |
| C                                           | 12.299298 | 11.818374 | 4.915607  | C  | 7.656459  | 3.193766  | 4.327082  |
| C                                           | 13.355772 | 12.195652 | 5.759159  | H  | 8.246262  | 3.069235  | 3.416346  |
| H                                           | 13.392966 | 11.833865 | 6.790489  | C  | 6.499227  | 2.440661  | 4.521962  |
| C                                           | 14.359709 | 13.040507 | 5.296885  | H  | 6.180912  | 1.719769  | 3.765620  |
| H                                           | 15.172913 | 13.326847 | 5.967652  | C  | 5.749949  | 2.605158  | 5.686795  |
| C                                           | 14.320866 | 13.520818 | 3.985239  | H  | 4.843749  | 2.015470  | 5.843074  |
| H                                           | 15.106430 | 14.188118 | 3.623266  | C  | 6.153008  | 3.523152  | 6.654922  |
| C                                           | 13.271288 | 13.155454 | 3.145617  | H  | 5.559235  | 3.632283  | 7.564830  |
| H                                           | 13.228135 | 13.527521 | 2.119533  | H  | 17.872690 | 11.951583 | 8.223628  |
| C                                           | 12.261506 | 12.309294 | 3.607326  | H  | 16.961233 | 10.367379 | 6.561995  |
| H                                           | 11.451593 | 12.045327 | 2.926774  | C  | 11.442604 | 6.772201  | 5.181454  |
| C                                           | 9.786587  | 10.467675 | 4.305984  | P  | 7.932578  | 5.497170  | 7.681707  |
| H                                           | 9.458827  | 11.423418 | 3.870377  | N  | 11.296468 | 8.159072  | 8.309156  |
| H                                           | 8.915211  | 9.996970  | 4.785200  | C  | 16.400927 | 10.561790 | 7.479654  |
| C                                           | 10.512859 | 10.359477 | 1.339223  | As | 10.387870 | 9.229312  | 2.893908  |
| C                                           | 9.473429  | 11.228448 | 0.982224  | Cu | 10.227442 | 5.404966  | 7.668951  |
| H                                           | 8.548564  | 11.258268 | 1.565421  | Cu | 12.147582 | 7.971880  | 3.852883  |
| C                                           | 9.609279  | 12.050472 | -0.133435 | As | 11.157166 | 3.594400  | 8.852736  |
| H                                           | 8.798776  | 12.727336 | -0.412997 | P  | 11.770707 | 5.177173  | 11.497111 |
| C                                           | 10.776946 | 12.003246 | -0.898316 | P  | 14.372303 | 8.233303  | 3.418780  |
| H                                           | 10.878954 | 12.646936 | -1.775016 | As | 14.339066 | 8.699219  | 6.483393  |
| C                                           | 11.807249 | 11.132877 | -0.549150 | C  | 12.136782 | 2.414248  | 7.672443  |
| H                                           | 12.720984 | 11.088191 | -1.144848 | C  | 12.153316 | 2.714226  | 6.306839  |
| C                                           | 11.679029 | 10.310998 | 0.570643  | H  | 11.637881 | 3.604380  | 5.936614  |
| H                                           | 12.495222 | 9.640936  | 0.849899  | C  | 12.838664 | 1.882957  | 5.420939  |
| C                                           | 8.762111  | 8.228579  | 2.577322  | H  | 12.837235 | 2.110078  | 4.352134  |
| C                                           | 8.235073  | 8.082062  | 1.290932  | C  | 13.519329 | 0.764589  | 5.898626  |
| H                                           | 8.709170  | 8.574759  | 0.438772  | H  | 14.057846 | 0.114439  | 5.205261  |
| C                                           | 7.090207  | 7.309689  | 1.093725  | C  | 13.504823 | 0.465464  | 7.262537  |
| H                                           | 6.679351  | 7.201856  | 0.087309  | H  | 14.030211 | -0.417103 | 7.634419  |
| C                                           | 6.468937  | 6.686293  | 2.174230  | C  | 12.806493 | 1.281853  | 8.148914  |
| H                                           | 5.567844  | 6.089268  | 2.017410  | H  | 12.777471 | 1.023994  | 9.211276  |
| C                                           | 7.000722  | 6.823151  | 3.456426  | C  | 9.885090  | 2.358849  | 9.627098  |
| H                                           | 6.523519  | 6.334800  | 4.307940  | C  | 8.852547  | 1.917913  | 8.787685  |
| C                                           | 8.151624  | 7.580701  | 3.657517  | H  | 8.786263  | 2.275928  | 7.755559  |
| H                                           | 8.566497  | 7.658983  | 4.665273  | C  | 7.911273  | 1.004831  | 9.256296  |
| C                                           | 6.675747  | 7.658827  | 10.690483 | H  | 7.114748  | 0.660886  | 8.592325  |
| C                                           | 5.290509  | 7.606685  | 10.885018 | C  | 7.994826  | 0.524287  | 10.565284 |
| H                                           | 4.798982  | 6.655883  | 11.109492 | H  | 7.260438  | -0.197649 | 10.929789 |
| C                                           | 4.536097  | 8.774195  | 10.810294 | C  | 9.020282  | 0.960930  | 11.401100 |
| H                                           | 3.455712  | 8.734598  | 10.966428 | H  | 9.092475  | 0.590522  | 12.426128 |
| C                                           | 5.160505  | 9.993196  | 10.541163 | C  | 9.965579  | 1.877081  | 10.935758 |
| H                                           | 4.565968  | 10.907904 | 10.485375 | H  | 10.755784 | 2.204885  | 11.612687 |
| C                                           | 6.538688  | 10.045831 | 10.346449 | C  | 12.427091 | 3.926833  | 10.294189 |
| H                                           | 7.026091  | 10.997672 | 10.124865 | H  | 12.722775 | 2.997103  | 10.801703 |
| C                                           | 7.299384  | 8.880000  | 10.424164 | H  | 13.322255 | 4.343921  | 9.810227  |
| H                                           | 8.380414  | 8.917099  | 10.261421 | C  | 11.503175 | 4.233051  | 13.026081 |
| C                                           | 6.997096  | 5.092498  | 12.241813 | C  | 12.510339 | 3.430141  | 13.582986 |
|                                             |           |           |           | H  | 13.506577 | 3.402739  | 13.132315 |
|                                             |           |           |           | C  | 12.246295 | 2.673890  | 14.720555 |

|                                                                                                |           |           |           |   |           |           |           |
|------------------------------------------------------------------------------------------------|-----------|-----------|-----------|---|-----------|-----------|-----------|
| H                                                                                              | 13.031339 | 2.049721  | 15.153219 | H | 2.852104  | 7.371437  | -5.069976 |
| C                                                                                              | 10.980656 | 2.717112  | 15.311755 | C | 1.360474  | 5.810962  | -5.024627 |
| H                                                                                              | 10.778152 | 2.121064  | 16.204590 | H | 0.939906  | 6.078294  | -5.996745 |
| C                                                                                              | 9.981830  | 3.522555  | 14.769897 | C | 0.808572  | 4.760680  | -4.295282 |
| H                                                                                              | 8.991149  | 3.562936  | 15.226937 | H | -0.055253 | 4.223858  | -4.696776 |
| C                                                                                              | 10.242975 | 4.280408  | 13.628728 | C | -1.180372 | 3.763425  | -1.610272 |
| H                                                                                              | 9.456530  | 4.900582  | 13.195266 | C | -1.241765 | 4.728388  | -0.595160 |
| C                                                                                              | 13.230066 | 6.225057  | 11.824669 | H | -0.336257 | 5.011929  | -0.048205 |
| C                                                                                              | 13.571278 | 6.607711  | 13.126886 | C | -2.450625 | 5.347882  | -0.287403 |
| H                                                                                              | 12.995111 | 6.237776  | 13.978121 | H | -2.485489 | 6.107620  | 0.497112  |
| C                                                                                              | 14.661276 | 7.450029  | 13.344008 | C | -3.609508 | 5.001240  | -0.985792 |
| H                                                                                              | 14.925281 | 7.736055  | 14.364640 | H | -4.557868 | 5.487536  | -0.745888 |
| C                                                                                              | 15.418139 | 7.912773  | 12.269124 | C | -3.551554 | 4.041730  | -1.994592 |
| H                                                                                              | 16.279646 | 8.561118  | 12.443917 | H | -4.453478 | 3.766238  | -2.545606 |
| C                                                                                              | 15.073480 | 7.544573  | 10.968625 | C | -2.339447 | 3.426279  | -2.312472 |
| H                                                                                              | 15.658612 | 7.902859  | 10.119097 | H | -2.319895 | 2.680757  | -3.108592 |
| C                                                                                              | 13.975531 | 6.719617  | 10.745107 | C | 0.266653  | 1.578599  | -3.244436 |
| H                                                                                              | 13.712622 | 6.464151  | 9.716372  | H | -0.339609 | 1.895672  | -4.105062 |
| C                                                                                              | 15.349531 | 6.694960  | 3.438523  | H | 1.267811  | 1.308323  | -3.613117 |
| C                                                                                              | 16.700548 | 6.700693  | 3.064997  | C | -2.187970 | 0.073047  | -2.883819 |
| H                                                                                              | 17.161201 | 7.616923  | 2.685158  | C | -2.553537 | 0.191034  | -4.233644 |
| C                                                                                              | 17.455162 | 5.536350  | 3.163460  | H | -1.786146 | 0.271539  | -5.008927 |
| H                                                                                              | 18.506361 | 5.542593  | 2.866698  | C | -3.897007 | 0.192658  | -4.593957 |
| C                                                                                              | 16.868534 | 4.362591  | 3.639769  | H | -4.178923 | 0.286350  | -5.645079 |
| H                                                                                              | 17.464243 | 3.450431  | 3.719967  | C | -4.883890 | 0.065357  | -3.612463 |
| C                                                                                              | 15.526134 | 4.352288  | 4.010107  | H | -5.938127 | 0.065212  | -3.898805 |
| H                                                                                              | 15.067931 | 3.438127  | 4.392847  | C | -4.524910 | -0.070694 | -2.273993 |
| C                                                                                              | 14.763768 | 5.514369  | 3.904067  | H | -5.289567 | -0.174849 | -1.501969 |
| H                                                                                              | 13.712383 | 5.511744  | 4.202477  | C | -3.178408 | -0.065044 | -1.909305 |
| C                                                                                              | 14.894961 | 9.068075  | 1.885933  | H | -2.898842 | -0.154587 | -0.858725 |
| C                                                                                              | 15.169898 | 10.438699 | 1.840580  | C | 0.296946  | -1.338916 | -3.198541 |
| H                                                                                              | 15.146901 | 11.045734 | 2.746840  | C | -0.503740 | -2.417872 | -3.593998 |
| C                                                                                              | 15.467075 | 11.054077 | 0.625463  | H | -1.589397 | -2.362554 | -3.489338 |
| H                                                                                              | 15.685581 | 12.124157 | 0.603047  | C | 0.078408  | -3.565162 | -4.130338 |
| C                                                                                              | 15.489830 | 10.309510 | -0.551947 | H | -0.557127 | -4.397327 | -4.412888 |
| H                                                                                              | 15.731834 | 10.792093 | -1.501624 | C | 1.461458  | -3.646679 | -4.274649 |
| C                                                                                              | 15.207974 | 8.942849  | -0.513871 | H | 1.916483  | -4.543589 | -4.701083 |
| H                                                                                              | 15.226114 | 8.353220  | -1.433130 | C | 2.263060  | -2.577522 | -3.875083 |
| C                                                                                              | 14.908952 | 8.324075  | 0.696728  | H | 3.347031  | -2.634598 | -3.985201 |
| H                                                                                              | 14.696412 | 7.251604  | 0.718206  | C | 1.689815  | -1.431738 | -3.329867 |
| C                                                                                              | 15.133271 | 9.215861  | 4.773854  | H | 2.339908  | -0.614257 | -3.006735 |
| H                                                                                              | 14.856811 | 10.274248 | 4.650807  | C | 1.069783  | 4.811606  | 2.466256  |
| H                                                                                              | 16.229187 | 9.120052  | 4.757982  | C | 2.220795  | 5.498207  | 2.051416  |
| C                                                                                              | 15.188943 | 7.009493  | 6.892025  | H | 3.000443  | 4.968357  | 1.496603  |
| C                                                                                              | 16.580698 | 6.873244  | 6.877102  | C | 2.367868  | 6.852502  | 2.339850  |
| H                                                                                              | 17.220667 | 7.727768  | 6.642425  | H | 3.271089  | 7.377821  | 2.021824  |
| C                                                                                              | 17.165041 | 5.643838  | 7.168890  | C | 1.363345  | 7.536694  | 3.024083  |
| H                                                                                              | 18.252323 | 5.541809  | 7.153084  | H | 1.476873  | 8.600737  | 3.243139  |
| C                                                                                              | 16.362003 | 4.546080  | 7.478647  | C | 0.209610  | 6.863075  | 3.422975  |
| H                                                                                              | 16.820326 | 3.580005  | 7.701667  | H | -0.580556 | 7.397910  | 3.954924  |
| C                                                                                              | 14.975744 | 4.677762  | 7.492164  | C | 0.061627  | 5.504259  | 3.148608  |
| H                                                                                              | 14.349816 | 3.808722  | 7.703153  | H | -0.848312 | 4.991917  | 3.469098  |
| C                                                                                              | 14.384964 | 5.908320  | 7.202245  | C | 1.798695  | 2.187673  | 3.452534  |
| H                                                                                              | 13.296282 | 6.006167  | 7.196621  | C | 1.438040  | 2.441805  | 4.781781  |
| C                                                                                              | 15.176285 | 9.930450  | 7.718397  | H | 0.679281  | 3.194850  | 5.012589  |
| C                                                                                              | 14.469288 | 10.210849 | 8.894357  | C | 2.051088  | 1.745413  | 5.818558  |
| H                                                                                              | 13.507710 | 9.725024  | 9.086385  | H | 1.766041  | 1.948299  | 6.853121  |
| C                                                                                              | 14.989176 | 11.106185 | 9.827295  | C | 3.024515  | 0.785615  | 5.536284  |
| H                                                                                              | 14.434729 | 11.315450 | 10.744822 | H | 3.495706  | 0.231840  | 6.351369  |
| C                                                                                              | 16.211143 | 11.732889 | 9.586654  | C | 3.388911  | 0.531153  | 4.217263  |
| H                                                                                              | 16.616308 | 12.439757 | 10.314160 | H | 4.130053  | -0.239855 | 3.993590  |
| C                                                                                              | 16.915514 | 11.460424 | 8.413617  | C | 2.785568  | 1.236719  | 3.177236  |
|                                                                                                |           |           |           | H | 3.068071  | 1.042806  | 2.141952  |
|                                                                                                |           |           |           | C | -0.793153 | 6.079955  | 2.300968  |
|                                                                                                |           |           |           | H | -1.138400 | 2.705104  | 3.340637  |
|                                                                                                |           |           |           | H | -1.383467 | 3.275859  | 1.655679  |
|                                                                                                |           |           |           | C | -0.726476 | -0.251657 | 3.258549  |
|                                                                                                |           |           |           | C | -1.486098 | -0.101690 | 4.424732  |
|                                                                                                |           |           |           | H | -2.349475 | 0.569291  | 4.440266  |
|                                                                                                |           |           |           | C | -1.148530 | -0.818809 | 5.569232  |
|                                                                                                |           |           |           | H | -1.744233 | -0.704556 | 6.477684  |
|                                                                                                |           |           |           | C | -0.051134 | -1.681129 | 5.555304  |
|                                                                                                |           |           |           | H | 0.212628  | -2.239953 | 6.456063  |
|                                                                                                |           |           |           | C | 0.707370  | -1.829064 | 4.396422  |
|                                                                                                |           |           |           | H | 1.574560  | -2.493062 | 4.388479  |
|                                                                                                |           |           |           | C | 0.368723  | -1.118642 | 3.245786  |
|                                                                                                |           |           |           | H | 0.970532  | -1.222530 | 2.338136  |
| <b>A<sub>opt-const</sub>(S<sub>1</sub>) starting from A<sub>opt-const</sub>(S<sub>0</sub>)</b> |           |           |           |   |           |           |           |
| Cu                                                                                             | 1.828606  | 2.578258  | 0.000000  |   |           |           |           |
| Cu                                                                                             | 6.715735  | 2.459354  | 0.010866  |   |           |           |           |
| As                                                                                             | 0.573123  | 3.017675  | -1.955463 |   |           |           |           |
| P                                                                                              | -0.444770 | 0.112736  | -2.374044 |   |           |           |           |
| P                                                                                              | 0.971202  | 3.036994  | 2.060735  |   |           |           |           |
| As                                                                                             | -1.102903 | 0.781244  | 1.673595  |   |           |           |           |
| C                                                                                              | 1.346622  | 4.417975  | -3.049534 |   |           |           |           |
| C                                                                                              | 2.429291  | 5.135713  | -2.532517 |   |           |           |           |
| H                                                                                              | 2.857615  | 4.859311  | -1.565122 |   |           |           |           |
| C                                                                                              | 2.962236  | 6.201990  | -3.257971 |   |           |           |           |
| H                                                                                              | 3.792826  | 6.777282  | -2.841537 |   |           |           |           |
| C                                                                                              | 2.434050  | 6.535982  | -4.503499 |   |           |           |           |



|    |           |           |           |   |           |           |           |
|----|-----------|-----------|-----------|---|-----------|-----------|-----------|
| C  | -4.969804 | 0.136855  | -3.451748 | C | 4.473993  | -4.166234 | 3.857193  |
| H  | -6.033297 | 0.141286  | -3.701538 | H | 3.957900  | -4.994896 | 4.347697  |
| C  | -4.564628 | -0.029549 | -2.129907 | C | 5.727881  | -3.758728 | 4.317928  |
| H  | -5.301981 | -0.152596 | -1.334344 | H | 6.190834  | -4.266496 | 5.167000  |
| C  | -3.206357 | -0.029325 | -1.812426 | C | 6.396982  | -2.713057 | 3.689391  |
| H  | -2.890395 | -0.141622 | -0.774285 | H | 7.386635  | -2.412533 | 4.043410  |
| C  | 0.237046  | -1.263685 | -3.224647 | C | 8.233104  | -1.418398 | 1.176356  |
| C  | -0.567442 | -2.317867 | -3.674215 | C | 8.232938  | -2.725790 | 0.664873  |
| H  | -1.653816 | -2.257694 | -3.580969 | H | 7.311483  | -3.313107 | 0.655563  |
| C  | 0.012888  | -3.447176 | -4.249699 | C | 9.411233  | -3.281924 | 0.176564  |
| H  | -0.625041 | -4.260269 | -4.603295 | H | 9.403159  | -4.302865 | -0.210757 |
| C  | 1.396989  | -3.535049 | -4.378224 | C | 10.596419 | -2.543506 | 0.187847  |
| H  | 1.850006  | -4.417737 | -4.835349 | H | 11.521087 | -2.988359 | -0.186879 |
| C  | 2.202640  | -2.491286 | -3.922787 | C | 10.599502 | -1.243503 | 0.691616  |
| H  | 3.287674  | -2.553641 | -4.019217 | H | 11.522044 | -0.659323 | 0.716384  |
| C  | 1.631201  | -1.363759 | -3.339283 | C | 9.423672  | -0.677276 | 1.181488  |
| H  | 2.282879  | -0.565627 | -2.973099 | H | 9.457785  | 0.338110  | 1.576934  |
| C  | 1.072920  | 4.852119  | 2.445688  | C | 7.073246  | 0.522686  | 3.040835  |
| C  | 2.209069  | 5.550009  | 2.009486  | H | 7.844242  | 0.138791  | 3.726490  |
| H  | 2.995699  | 5.022097  | 1.463481  | H | 6.143287  | 0.673841  | 3.610737  |
| C  | 2.333159  | 6.913093  | 2.266003  | C | 9.412510  | 2.436205  | 2.697830  |
| H  | 3.224870  | 7.447015  | 1.930290  | C | 9.978718  | 1.953183  | 3.884573  |
| C  | 1.320832  | 7.594728  | 2.941010  | H | 9.352090  | 1.502874  | 4.659299  |
| H  | 1.416577  | 8.665228  | 3.135574  | C | 11.352631 | 2.051256  | 4.091376  |
| C  | 0.182106  | 6.909447  | 3.362534  | H | 11.791041 | 1.675554  | 5.018687  |
| H  | -0.613949 | 7.441447  | 3.888506  | C | 12.167420 | 2.631636  | 3.117435  |
| C  | 0.056813  | 5.542502  | 3.118892  | H | 13.244624 | 2.705484  | 3.283055  |
| H  | -0.842290 | 5.021726  | 3.455745  | C | 11.607523 | 3.118464  | 1.938004  |
| C  | 1.847339  | 2.268456  | 3.488017  | H | 12.238005 | 3.571746  | 1.170354  |
| C  | 1.569354  | 2.636867  | 4.810411  | C | 10.232540 | 3.020497  | 1.727779  |
| H  | 0.871049  | 3.452368  | 5.019112  | H | 9.799031  | 3.387775  | 0.794712  |
| C  | 2.191452  | 1.977540  | 5.866024  | C | 6.692887  | 3.441772  | 3.631295  |
| H  | 1.974330  | 2.272504  | 6.894945  | C | 7.416883  | 4.090964  | 4.635089  |
| C  | 3.087724  | 0.938421  | 5.610766  | H | 8.499187  | 3.965604  | 4.708752  |
| H  | 3.564861  | 0.414245  | 6.441812  | C | 6.754721  | 4.916579  | 5.543702  |
| C  | 3.368614  | 0.569215  | 4.298211  | H | 7.324092  | 5.423811  | 6.325887  |
| H  | 4.048118  | -0.262392 | 4.095348  | C | 5.376142  | 5.098349  | 5.451374  |
| C  | 2.760365  | 1.240015  | 3.238241  | H | 4.862113  | 5.747239  | 6.164035  |
| H  | 2.981986  | 0.955942  | 2.209446  | C | 4.655153  | 4.462419  | 4.440866  |
| C  | -0.758225 | 2.622049  | 2.351724  | H | 3.577805  | 4.613012  | 4.353506  |
| H  | -1.079155 | 2.713143  | 3.399758  | C | 5.310831  | 3.642154  | 3.526535  |
| H  | -1.367967 | 3.288131  | 1.722611  | H | 4.742826  | 3.168076  | 2.722669  |
| C  | -0.642566 | -0.252702 | 3.272833  | C | 6.224674  | -2.437378 | -2.078766 |
| C  | -1.313578 | -0.066091 | 4.487104  | C | 5.076554  | -3.182822 | -1.777800 |
| H  | -2.137761 | 0.649055  | 4.559786  | H | 4.186615  | -2.686060 | -1.379430 |
| C  | -0.938942 | -0.801987 | 5.607686  | C | 5.065222  | -4.557335 | -1.995925 |
| H  | -1.464480 | -0.656915 | 6.554173  | H | 4.166349  | -5.135497 | -1.770303 |
| C  | 0.105692  | -1.723511 | 5.520762  | C | 6.200581  | -5.192790 | -2.503284 |
| H  | 0.398843  | -2.297999 | 6.402340  | H | 6.192336  | -6.272015 | -2.671871 |
| C  | 0.774201  | -1.910733 | 4.313438  | C | 7.345323  | -4.452106 | -2.796127 |
| H  | 1.600317  | -2.621822 | 4.249225  | H | 8.231426  | -4.949523 | -3.197353 |
| C  | 0.400298  | -1.178181 | 3.187759  | C | 7.363552  | -3.074339 | -2.581643 |
| H  | 0.935230  | -1.310977 | 2.242737  | H | 8.268665  | -2.507614 | -2.808950 |
| C  | -3.009487 | 0.781895  | 1.681505  | C | 5.093894  | 0.125867  | -3.202950 |
| C  | -3.693132 | 1.853882  | 1.096830  | C | 5.139078  | -0.544705 | -4.430791 |
| H  | -3.153799 | 2.714454  | 0.693229  | H | 5.693506  | -1.481342 | -4.532122 |
| C  | -5.082620 | 1.827899  | 1.006387  | C | 4.473722  | -0.010905 | -5.532651 |
| H  | -5.607971 | 2.672832  | 0.555480  | H | 4.506958  | -0.534575 | -6.490584 |
| C  | -5.795806 | 0.728295  | 1.484064  | C | 3.775057  | 1.189622  | -5.412793 |
| H  | -6.886065 | 0.711547  | 1.417989  | H | 3.267365  | 1.613822  | -6.282158 |
| C  | -5.114576 | -0.351137 | 2.045655  | C | 3.729709  | 1.853273  | -4.186965 |
| H  | -5.668850 | -1.215948 | 2.417320  | H | 3.204014  | 2.806559  | -4.093757 |
| C  | -3.723434 | -0.328016 | 2.145086  | C | 4.376751  | 1.318827  | -3.074595 |
| H  | -3.198896 | -1.173775 | 2.596988  | H | 4.333142  | 1.843969  | -2.119743 |
| N  | 3.698207  | 3.182605  | -0.059646 | C | 7.931853  | 0.132372  | -2.031092 |
| C  | 4.866826  | 3.063841  | -0.005674 | H | 8.275551  | -0.133488 | -3.042221 |
| Cu | 5.242450  | 0.295115  | 0.276980  | H | 8.572325  | -0.363167 | -1.284989 |
| Cu | 0.255188  | 0.417819  | -0.209210 | C | 7.344925  | 2.720046  | -3.235945 |
| P  | 6.669300  | -0.704209 | 1.743839  | C | 7.747287  | 2.279826  | -4.502713 |
| As | 7.524796  | 2.312231  | 2.297876  | H | 8.440420  | 1.440774  | -4.605885 |
| As | 6.138464  | -0.547780 | -1.726468 | C | 7.279529  | 2.919933  | -5.645963 |
| P  | 7.967970  | 1.949910  | -1.700053 | H | 7.592151  | 2.568619  | -6.631778 |
| C  | 5.806566  | -2.062656 | 2.596111  | C | 6.424366  | 4.017386  | -5.532153 |
| C  | 4.548263  | -2.470841 | 2.138858  | H | 6.064183  | 4.522945  | -6.431035 |
| H  | 4.086415  | -1.963381 | 1.287938  | C | 6.033916  | 4.468834  | -4.274347 |
| C  | 3.886879  | -3.524479 | 2.768486  | H | 5.357867  | 5.320830  | -4.183686 |
| H  | 2.911227  | -3.849086 | 2.398998  | C | 6.486598  | 3.818798  | -3.127621 |

|   |           |          |           |   |           |          |           |
|---|-----------|----------|-----------|---|-----------|----------|-----------|
| H | 6.159010  | 4.151120 | -2.138783 | C | -2.574036 | 3.409475 | 4.006639  |
| C | 9.753277  | 2.345341 | -1.777438 | C | -2.744807 | 4.777607 | 3.811682  |
| C | 10.769161 | 1.388144 | -1.703515 | C | -3.463869 | 5.242257 | 2.709538  |
| H | 10.533015 | 0.324901 | -1.643323 | C | -4.013031 | 4.339123 | 1.805325  |
| C | 12.107635 | 1.782318 | -1.710583 | C | -6.298730 | 1.841927 | 0.952074  |
| H | 12.893884 | 1.025439 | -1.659557 | C | -6.919782 | 2.424216 | 2.062145  |
| C | 12.442419 | 3.131318 | -1.793516 | C | -8.311266 | 2.434631 | 2.156159  |
| H | 13.491136 | 3.436390 | -1.806773 | C | -9.088440 | 1.869871 | 1.146470  |
| C | 11.432178 | 4.092286 | -1.871003 | C | -8.471231 | 1.280332 | 0.042207  |
| H | 11.687110 | 5.151730 | -1.946393 | C | -7.083265 | 1.257354 | -0.052305 |
| C | 10.096716 | 3.702976 | -1.861235 | C | 4.675550  | 1.008770 | 2.168685  |
| H | 9.311810  | 4.462015 | -1.929614 | C | 5.862924  | 1.683605 | 1.870703  |
| N | 3.337573  | 0.027019 | -0.042775 | C | 7.077019  | 1.230536 | 2.389535  |
| C | 2.182615  | 0.217791 | -0.109452 | C | 7.114050  | 0.112451 | 3.219318  |

### **B<sub>opt-full</sub>(S<sub>0</sub>)**

|    |           |           |           |   |           |           |           |
|----|-----------|-----------|-----------|---|-----------|-----------|-----------|
| Cu | 3.307092  | 0.093718  | -1.230975 | C | 4.718498  | -0.111859 | 3.011789  |
| C  | 1.373228  | 0.073370  | -1.494421 | C | 2.346071  | 2.329132  | 3.081994  |
| N  | 0.213016  | 0.064639  | -1.625895 | C | 2.894363  | 3.510328  | 3.599190  |
| Cu | -1.723151 | 0.056875  | -1.152502 | C | 2.375861  | 4.068760  | 4.763759  |
| Cu | -3.339257 | -0.232984 | 0.973987  | C | 1.325791  | 3.438769  | 5.435315  |
| C  | -1.406887 | -0.218223 | 1.237144  | C | 0.791494  | 2.253943  | 4.934623  |
| N  | -0.245197 | -0.208728 | 1.355140  | C | 1.290622  | 1.704773  | 3.754465  |
| Cu | 1.690344  | -0.204312 | 0.883045  | C | 5.696574  | 2.770200  | -1.284063 |
| P  | 4.448693  | -1.876117 | -1.085207 | C | 6.646187  | 1.774919  | -1.529813 |
| P  | 3.948211  | 2.284217  | -1.208224 | C | 8.003669  | 2.092287  | -1.557454 |
| P  | -3.058714 | -1.666297 | -1.852535 | C | 8.413604  | 3.405634  | -1.339153 |
| P  | -2.450432 | 2.217979  | -1.382597 | C | 7.467462  | 4.407077  | -1.102752 |
| P  | -3.987306 | -2.426656 | 0.941569  | C | 6.111846  | 4.094241  | -1.079331 |
| P  | -4.483265 | 1.734853  | 0.812316  | C | 3.125301  | 3.354997  | -2.436488 |
| P  | 2.419837  | -2.363088 | 1.109774  | C | 3.840796  | 3.819926  | -3.547736 |
| P  | 3.021471  | 1.526720  | 1.584791  | C | 3.199685  | 4.571553  | -4.530466 |
| C  | 4.158349  | -2.622874 | 0.571511  | C | 1.842989  | 4.867223  | -4.413207 |
| C  | -3.362599 | -3.057590 | -0.688299 | C | 1.125091  | 4.398782  | -3.313715 |
| C  | -4.190494 | 2.474193  | -0.847580 | C | 1.755497  | 3.634826  | -2.335129 |
| C  | 3.321263  | 2.918489  | 0.419158  | C | 2.432088  | -2.842044 | 2.870050  |
| H  | 4.785351  | -2.054705 | 1.277146  | C | 1.360331  | -2.398397 | 3.658367  |
| H  | 4.468900  | -3.677986 | 0.597539  | C | 1.314335  | -2.701993 | 5.016639  |
| C  | -4.710264 | -1.146139 | -2.441794 | C | 2.342273  | -3.438259 | 5.604494  |
| C  | -5.899733 | -1.817845 | -2.145166 | C | 3.414318  | -3.877554 | 4.828132  |
| C  | -7.111178 | -1.365466 | -2.670759 | C | 3.460571  | -3.583592 | 3.466126  |
| C  | -7.143539 | -0.250694 | -3.505177 | C | 1.499157  | -3.699049 | 0.269387  |
| C  | -5.956037 | 0.414341  | -3.819850 | C | 0.743637  | -3.389680 | -0.868787 |
| C  | -4.748340 | -0.029345 | -3.290205 | C | 0.100550  | -4.404276 | -1.576635 |
| C  | -2.383352 | -2.468859 | -3.349917 | C | 0.179455  | -5.723659 | -1.133548 |
| C  | -2.928634 | -3.652483 | -3.864612 | C | 0.911641  | -6.033361 | 0.012797  |
| C  | -2.412491 | -4.209278 | -5.031052 | C | 1.576274  | -5.026561 | 0.708723  |
| C  | -1.367973 | -3.575009 | -5.707188 | C | 3.790954  | -3.095784 | -2.264260 |
| C  | -0.836805 | -2.387714 | -5.208980 | C | 3.067325  | -2.629094 | -3.366821 |
| C  | -1.332990 | -1.840614 | -4.026701 | C | 2.532406  | -3.529319 | -4.285860 |
| C  | -5.738485 | -2.903304 | 1.012421  | C | 2.698776  | -4.898874 | -4.097703 |
| C  | -6.682186 | -1.903788 | 1.263606  | C | 3.416422  | -5.371274 | -2.998066 |
| C  | -8.041849 | -2.212164 | 1.284907  | C | 3.968969  | -4.474336 | -2.089717 |
| C  | -8.460064 | -3.520788 | 1.054538  | C | 6.263543  | -1.981759 | -1.230818 |
| C  | -7.520013 | -4.526645 | 0.812662  | C | 6.882019  | -2.560904 | -2.343942 |
| C  | -6.162254 | -4.222812 | 0.795748  | C | 8.273194  | -2.567944 | -2.442744 |
| C  | -3.168365 | -3.510610 | 2.160861  | C | 9.052560  | -2.003041 | -1.434841 |
| C  | -3.885971 | -3.994833 | 3.262284  | C | 8.437866  | -1.416890 | -0.327355 |
| C  | -3.245247 | -4.758558 | 4.236024  | C | 7.050184  | -1.397256 | -0.228028 |
| C  | -1.886864 | -5.046492 | 4.119774  | H | -5.906416 | -2.695584 | -1.499388 |
| C  | -1.166540 | -4.558169 | 3.030422  | H | -8.032822 | -1.896304 | -2.422406 |
| C  | -1.796781 | -3.782906 | 2.060790  | H | -8.092422 | 0.097241  | -3.919578 |
| C  | -2.461913 | 2.692321  | -3.144080 | H | -5.967616 | 1.280283  | -4.485711 |
| C  | -1.388547 | 2.248449  | -3.930256 | H | -3.822005 | 0.489098  | -3.553645 |
| C  | -1.342946 | 2.546843  | -5.289723 | H | -3.768025 | -4.141619 | -3.363670 |
| C  | -2.372536 | 3.278209  | -5.880814 | H | -2.838403 | -5.134137 | -5.426461 |
| C  | -3.445929 | 3.717867  | -5.106520 | H | -0.977602 | -4.006081 | -6.632056 |
| C  | -3.491926 | 3.429108  | -3.743411 | H | -0.033030 | -1.877382 | -5.744620 |
| C  | -1.533350 | 3.557302  | -0.544310 | H | -0.900553 | -0.923331 | -3.622252 |
| C  | -0.781592 | 3.251927  | 0.597402  | H | -2.378627 | -3.522917 | -0.519454 |
| C  | -0.139203 | 4.268922  | 1.302472  | H | -4.025425 | -3.831119 | -1.104388 |
| C  | -0.215117 | 5.586447  | 0.853406  | H | -6.349339 | -0.876452 | 1.425098  |
| C  | -0.943409 | 5.892003  | -0.296594 | H | -8.770279 | -1.421779 | 1.478149  |
| C  | -1.607417 | 4.882946  | -0.989888 | H | -9.524736 | -3.765280 | 1.068681  |
| C  | -3.830659 | 2.962009  | 1.986704  | H | -7.850341 | -5.553969 | 0.643528  |
| C  | -3.106040 | 2.503183  | 3.091809  | H | -5.430271 | -5.016957 | 0.622422  |
|    |           |           |           | H | -4.953707 | -3.785084 | 3.357680  |
|    |           |           |           | H | -3.816883 | -5.137673 | 5.086127  |







|   |           |           |           |   |           |           |           |
|---|-----------|-----------|-----------|---|-----------|-----------|-----------|
| C | -1.016462 | -3.512545 | -5.890201 | C | 3.167916  | -3.113778 | -4.270186 |
| C | -0.429313 | -2.349260 | -5.398700 | C | 3.262297  | -4.487974 | -4.066737 |
| C | -0.940616 | -1.732421 | -4.256942 | C | 3.885834  | -4.983309 | -2.920162 |
| C | -5.284497 | -2.738802 | 0.786356  | C | 4.407878  | -4.108338 | -1.973629 |
| C | -6.256330 | -1.792058 | 1.117141  | C | 6.730049  | -1.465454 | -1.095170 |
| C | -7.602874 | -2.153913 | 1.158383  | C | 7.387645  | -2.006072 | -2.206847 |
| C | -7.979947 | -3.461988 | 0.865286  | C | 8.774767  | -1.909188 | -2.305849 |
| C | -7.010684 | -4.416827 | 0.544303  | C | 9.508316  | -1.271923 | -1.304860 |
| C | -5.666468 | -4.060470 | 0.511167  | C | 8.851901  | -0.722753 | -0.202742 |
| C | -2.713631 | -3.283913 | 1.926274  | C | 7.468227  | -0.812567 | -0.097689 |
| C | -3.431241 | -3.786489 | 3.019846  | H | -5.519521 | -2.601591 | -1.764286 |
| C | -2.786432 | -4.547071 | 3.993222  | H | -7.698242 | -1.856315 | -2.615532 |
| C | -1.424090 | -4.817415 | 3.881870  | H | -7.869000 | 0.186097  | -4.035621 |
| C | -0.704848 | -4.311732 | 2.799954  | H | -5.806246 | 1.475955  | -4.598779 |
| C | -1.338195 | -3.537451 | 1.833507  | H | -3.610469 | 0.739952  | -3.736394 |
| C | -2.359144 | 3.082600  | -3.337181 | H | -3.548018 | -3.851349 | -3.643279 |
| C | -1.333702 | 2.669671  | -4.200647 | H | -2.601785 | -4.960484 | -5.638881 |
| C | -1.345907 | 3.056183  | -5.538552 | H | -0.615474 | -3.994540 | -6.784886 |
| C | -2.386548 | 3.843123  | -6.031309 | H | 0.430176  | -1.909995 | -5.910182 |
| C | -3.415335 | 4.247466  | -5.181147 | H | -0.469088 | -0.830964 | -3.860013 |
| C | -3.403402 | 3.870875  | -3.838965 | H | -1.907657 | -3.202914 | -0.775283 |
| C | -1.374357 | 3.808869  | -0.704614 | H | -3.536235 | -3.638355 | -1.324806 |
| C | -0.604611 | 3.450520  | 0.409692  | H | -5.958712 | -0.763436 | 1.327906  |
| C | 0.018253  | 4.434807  | 1.176620  | H | -8.353866 | -1.403905 | 1.414682  |
| C | -0.100570 | 5.777206  | 0.819519  | H | -9.034248 | -3.746773 | 0.893602  |
| C | -0.850241 | 6.138069  | -0.300424 | H | -7.307158 | -5.445537 | 0.327426  |
| C | -1.490978 | 5.159232  | -1.056839 | H | -4.910970 | -4.816993 | 0.280162  |
| C | -3.593351 | 3.083866  | 1.858841  | H | -4.502557 | -3.593135 | 3.108803  |
| C | -2.867145 | 2.600508  | 2.952719  | H | -3.358216 | -4.938761 | 4.837476  |
| C | -2.385371 | 3.481518  | 3.917890  | H | -0.920477 | -5.423985 | 4.638000  |
| C | -2.600389 | 4.850625  | 3.781535  | H | 0.361457  | -4.519365 | 2.704308  |
| C | -3.317103 | 5.339589  | 2.688566  | H | -0.744053 | -3.129286 | 1.011285  |
| C | -3.822382 | 4.459879  | 1.736649  | H | -4.233607 | 4.861137  | -5.564768 |
| C | -6.007023 | 1.864919  | 0.825967  | H | -2.400618 | 4.137721  | -7.083058 |
| C | -6.626552 | 2.331283  | 1.990483  | H | -0.541215 | 2.732254  | -6.202392 |
| C | -8.012611 | 2.250389  | 2.122801  | H | -0.525844 | 2.039741  | -3.818649 |
| C | -8.786259 | 1.710421  | 1.096796  | H | -0.498436 | 2.400251  | 0.685325  |
| C | -8.169789 | 1.235769  | -0.061896 | H | 0.592867  | 4.147332  | 2.060139  |
| C | -6.786526 | 1.302296  | -0.194721 | H | 0.390588  | 6.547205  | 1.418957  |
| C | 5.020916  | 1.208503  | 2.370801  | H | -0.940517 | 7.189033  | -0.584371 |
| C | 6.183966  | 1.934670  | 2.099506  | H | -2.080951 | 5.449224  | -1.930761 |
| C | 7.401857  | 1.553497  | 2.663684  | H | -4.332602 | 3.740368  | -0.971005 |
| C | 7.468425  | 0.446371  | 3.507279  | H | -4.637471 | 2.137680  | -1.700618 |
| C | 6.309528  | -0.278669 | 3.792124  | H | -2.670727 | 1.527713  | 3.042231  |
| C | 5.094411  | 0.100775  | 3.229117  | H | -1.831649 | 3.097990  | 4.775499  |
| C | 2.670012  | 2.623327  | 3.136141  | H | -2.210114 | 5.542411  | 4.531368  |
| C | 3.224713  | 3.836991  | 3.562595  | H | -3.488488 | 6.412709  | 2.580813  |
| C | 2.682191  | 4.507277  | 4.655360  | H | -4.397785 | 4.854539  | 0.896128  |
| C | 1.599871  | 3.957902  | 5.346031  | H | -6.027962 | 2.766946  | 2.793872  |
| C | 1.055422  | 2.743402  | 4.934864  | H | -8.490607 | 2.621355  | 3.032168  |
| C | 1.578694  | 2.082542  | 3.824626  | H | -9.872519 | 1.659522  | 1.200098  |
| C | 5.869169  | 2.478908  | -1.434253 | H | -8.767030 | 0.802993  | -0.867706 |
| C | 6.556784  | 1.567161  | -2.241264 | H | -6.320952 | 0.896682  | -1.096793 |
| C | 7.904605  | 1.764642  | -2.533393 | H | -4.220065 | 4.193081  | -3.189294 |
| C | 8.572654  | 2.871627  | -2.016370 | H | 6.160765  | 2.800757  | 1.439281  |
| C | 7.887168  | 3.796999  | -1.226234 | H | 8.302719  | 2.128806  | 2.438564  |
| C | 6.538217  | 3.609130  | -0.942281 | H | 8.422245  | 0.150599  | 3.949775  |
| C | 3.307942  | 3.336460  | -2.404551 | H | 6.348054  | -1.142939 | 4.459287  |
| C | 4.036535  | 3.777555  | -3.519803 | H | 4.188409  | -0.465927 | 3.463501  |
| C | 3.425332  | 4.584161  | -4.475994 | H | 4.095068  | 4.259637  | 3.053827  |
| C | 2.089880  | 4.955884  | -4.329086 | H | 3.116487  | 5.454214  | 4.983711  |
| C | 1.361769  | 4.514755  | -3.223058 | H | 1.189596  | 4.476324  | 6.215700  |
| C | 1.959057  | 3.698982  | -2.269047 | H | 0.223588  | 2.300300  | 5.486481  |
| C | 3.044567  | -2.876741 | 2.972898  | H | 1.144055  | 1.138618  | 3.483100  |
| C | 1.986114  | -2.545864 | 3.831849  | H | 2.615896  | 3.380746  | 0.317713  |
| C | 1.974018  | -3.004642 | 5.145842  | H | 4.288956  | 3.746847  | 0.756626  |
| C | 3.031276  | -3.779005 | 5.624419  | H | 6.033301  | 0.699587  | -2.647115 |
| C | 4.095341  | -4.099453 | 4.782436  | H | 8.432622  | 1.040629  | -3.156752 |
| C | 4.102599  | -3.654914 | 3.460498  | H | 9.631528  | 3.023659  | -2.237556 |
| C | 2.052075  | -3.456724 | 0.319239  | H | 8.404214  | 4.678529  | -0.840581 |
| C | 1.276962  | -3.040995 | -0.772014 | H | 6.006948  | 4.362810  | -0.355593 |
| C | 0.627240  | -3.981843 | -1.568712 | H | 5.086813  | 3.503207  | -3.636430 |
| C | 0.716643  | -5.339178 | -1.259035 | H | 4.001835  | 4.930696  | -5.336462 |
| C | 1.464915  | -5.756499 | -0.158595 | H | 1.612638  | 5.592559  | -5.077552 |
| C | 2.138683  | -4.820493 | 0.623720  | H | 0.316629  | 4.801718  | -3.101169 |
| C | 4.308117  | -2.724087 | -2.166557 | H | 1.357879  | 3.346536  | -1.428041 |
| C | 3.687799  | -2.233858 | -3.324221 | H | 4.925127  | -4.704155 | 5.155383  |



|   |           |            |           |   |           |           |           |
|---|-----------|------------|-----------|---|-----------|-----------|-----------|
| C | 8.210506  | -2.182602  | 5.898941  | P | 3.727511  | 3.572595  | 12.794375 |
| H | 8.898545  | -2.843266  | 6.449247  | P | 2.338873  | 1.126876  | 11.667227 |
| H | 8.654602  | -1.940090  | 4.921516  | P | 5.159592  | 4.805407  | 9.479511  |
| C | 7.256254  | 0.542832   | 5.847607  | P | 2.697261  | 3.258511  | 8.465136  |
| C | 5.904480  | 0.878376   | 5.988762  | N | 4.141335  | -0.092437 | 8.927384  |
| H | 5.310463  | 0.429818   | 6.787127  | C | 4.864118  | -0.953698 | 8.594914  |
| C | 5.313494  | 1.777972   | 5.101521  | C | 3.205848  | 5.198156  | 13.407568 |
| H | 4.250530  | 2.010491   | 5.196183  | C | 2.279630  | 5.931679  | 12.651887 |
| C | 6.072749  | 2.366317   | 4.092366  | H | 1.870148  | 5.525859  | 11.723679 |
| H | 5.607827  | 3.073451   | 3.401654  | C | 1.882302  | 7.194414  | 13.075511 |
| C | 7.425586  | 2.050310   | 3.960927  | H | 1.157074  | 7.757200  | 12.483828 |
| H | 8.023974  | 2.515043   | 3.174214  | C | 2.410334  | 7.738482  | 14.247437 |
| C | 8.014673  | 1.137088   | 4.830858  | H | 2.094021  | 8.729145  | 14.581684 |
| H | 9.075196  | 0.893664   | 4.722636  | C | 3.339200  | 7.014938  | 14.994877 |
| C | 9.683588  | -0.126974  | 7.280267  | H | 3.747874  | 5.935695  | 15.916456 |
| C | 10.789600 | -0.494698  | 6.503284  | C | 3.742059  | 5.747386  | 14.578095 |
| H | 10.669754 | -1.151411  | 5.638809  | H | 4.464449  | 5.180424  | 15.170345 |
| C | 12.062130 | -0.030744  | 6.833381  | C | 4.710768  | 2.783250  | 14.106584 |
| H | 12.920181 | -0.320398  | 6.222554  | C | 6.105505  | 6.780673  | 13.966429 |
| C | 12.240416 | 0.801647   | 7.938101  | H | 6.563170  | 3.244308  | 13.086426 |
| H | 13.239625 | 1.160639   | 8.194614  | C | 6.906651  | 2.171524  | 14.928761 |
| C | 11.143445 | 1.170876   | 8.716084  | H | 7.991993  | 2.173975  | 14.811926 |
| H | 11.278289 | 1.823528   | 9.581391  | C | 6.320847  | 1.552595  | 16.030298 |
| C | 9.871373  | 0.704938   | 8.394088  | H | 6.946960  | 1.065937  | 16.781429 |
| H | 9.012377  | 0.994318   | 9.006296  | C | 4.932629  | 1.552001  | 16.175552 |
| C | 5.529011  | -6.395719  | 8.954631  | H | 4.472409  | 1.067232  | 17.039053 |
| C | 5.454076  | -7.328170  | 10.000167 | C | 4.128535  | 2.166669  | 15.221249 |
| H | 5.102279  | -7.021242  | 10.989388 | H | 3.044870  | 2.156370  | 15.351748 |
| C | 5.810891  | -8.653818  | 9.775436  | C | 2.144715  | 2.646646  | 12.698333 |
| H | 5.751820  | -9.379223  | 10.589974 | H | 1.434529  | 3.300050  | 12.166382 |
| C | 6.233700  | -9.059173  | 8.506301  | H | 1.742345  | 2.452469  | 13.703728 |
| H | 6.508125  | -10.102295 | 8.332990  | C | 3.223183  | -0.027523 | 12.773890 |
| C | 6.295541  | -8.139248  | 7.462563  | C | 4.593935  | -0.228729 | 12.568454 |
| H | 6.620391  | -8.449550  | 6.467499  | H | 5.089454  | 0.245636  | 11.717883 |
| C | 5.944780  | -6.807866  | 7.686257  | C | 5.321840  | -1.035658 | 13.441652 |
| H | 6.007207  | -6.080659  | 6.874767  | H | 6.396160  | -1.163872 | 13.291130 |
| C | 3.404030  | -4.701727  | 9.859887  | C | 4.677889  | -1.674038 | 14.501184 |
| C | 2.917148  | -3.696055  | 10.704656 | H | 5.247455  | -2.313051 | 15.179959 |
| H | 3.554806  | -2.873036  | 11.035227 | C | 3.307095  | -1.499611 | 14.693274 |
| C | 1.595988  | -3.730585  | 11.143657 | H | 2.799799  | -2.008677 | 15.515971 |
| H | 1.238335  | -2.952856  | 11.820002 | C | 2.581889  | -0.672308 | 13.838867 |
| C | 0.738939  | -4.745083  | 10.720942 | H | 1.508361  | -0.536017 | 13.996780 |
| H | -0.296750 | -4.766408  | 11.067385 | C | 0.636825  | 0.465919  | 11.578465 |
| C | 1.210279  | -5.732223  | 9.857277  | C | -0.410755 | 0.840605  | 12.429888 |
| H | 0.545987  | -6.531319  | 9.520618  | H | -0.245869 | 1.556298  | 13.238234 |
| C | 2.536129  | -5.714772  | 9.429823  | C | -1.685274 | 0.302873  | 12.251024 |
| H | 2.899615  | -6.504341  | 8.767845  | H | -2.497904 | 0.601516  | 12.917292 |
| C | 6.121345  | -4.104753  | 10.660730 | C | -1.921922 | -0.616322 | 11.229630 |
| H | 6.484630  | -4.966374  | 11.240970 | H | -2.921518 | -1.035077 | 11.093500 |
| H | 5.473624  | -3.513997  | 11.326552 | C | -0.882879 | -0.994423 | 10.378582 |
| C | 8.765274  | -4.018835  | 9.408100  | H | -1.063079 | -1.714064 | 9.576904  |
| C | 9.868814  | -3.352206  | 8.853750  | C | 0.386244  | -0.447305 | 10.543613 |
| H | 9.921268  | -2.259837  | 8.883822  | H | 1.198769  | -0.726316 | 9.865474  |
| C | 10.912087 | -4.071460  | 8.278648  | C | 4.810361  | 6.436152  | 10.177252 |
| H | 11.767209 | -3.538323  | 7.856547  | C | 4.259140  | 7.481408  | 9.425240  |
| C | 10.865191 | -5.467541  | 8.249269  | H | 3.962358  | 7.327939  | 8.385535  |
| H | 11.684260 | -6.033120  | 7.799152  | C | 4.124377  | 8.747348  | 9.988185  |
| C | 9.775904  | -6.135180  | 8.804150  | H | 3.695458  | 9.559558  | 9.397313  |
| H | 9.730880  | -7.226350  | 8.788855  | C | 4.558011  | 8.983555  | 11.293195 |
| C | 8.730536  | -5.416378  | 9.386133  | H | 4.455268  | 9.979797  | 11.728941 |
| H | 7.891695  | -5.966038  | 9.813778  | C | 5.131884  | 7.953979  | 12.036661 |
| C | 8.262897  | -2.536026  | 11.776683 | H | 5.475925  | 8.135658  | 13.056169 |
| C | 8.534178  | -1.191941  | 12.053970 | C | 5.248264  | 6.681919  | 11.485632 |
| H | 8.243851  | -0.420911  | 11.336949 | H | 5.688682  | 5.870460  | 12.070391 |
| C | 9.166647  | -0.838501  | 13.245563 | C | 6.825659  | 4.943484  | 8.781165  |
| H | 9.396548  | 0.210897   | 13.444938 | C | 7.308042  | 3.934665  | 7.932723  |
| C | 9.511603  | -1.819841  | 14.172003 | H | 6.699395  | 3.061647  | 7.687624  |
| H | 10.006538 | -1.543092  | 15.105805 | C | 8.586923  | 4.032179  | 7.398890  |
| C | 9.238336  | -3.162538  | 13.901185 | H | 8.947929  | 3.249562  | 6.731122  |
| H | 9.519064  | -3.934073  | 14.621582 | C | 9.404179  | 5.116838  | 7.721587  |
| C | 8.628527  | -3.521884  | 12.703104 | H | 10.410920 | 5.183769  | 7.303190  |
| H | 8.452830  | -4.578940  | 12.485752 | C | 8.934635  | 6.112782  | 8.575990  |
|   |           |            |           | H | 9.567295  | 6.967105  | 8.826000  |
|   |           |            |           | C | 7.650329  | 6.031297  | 9.106912  |
|   |           |            |           | H | 7.286496  | 6.824458  | 9.762097  |
|   |           |            |           | C | 4.058748  | 4.447488  | 8.052486  |
|   |           |            |           | H | 3.732388  | 5.371493  | 7.549860  |

**B(S<sub>1</sub>) starting from B<sub>opt-const</sub>(S<sub>0</sub>)**

|    |          |          |           |
|----|----------|----------|-----------|
| Cu | 4.961468 | 3.040740 | 10.944080 |
| Cu | 3.349165 | 1.494952 | 9.687345  |



|    |           |           |           |    |           |           |           |
|----|-----------|-----------|-----------|----|-----------|-----------|-----------|
| C  | 4.893361  | 1.396706  | 16.069218 | Cu | 7.083626  | -0.745896 | 8.957665  |
| H  | 4.436909  | 0.884542  | 16.918781 | P  | 6.671874  | -2.764013 | 5.805974  |
| C  | 4.085708  | 2.050896  | 15.145100 | P  | 8.084480  | -0.340879 | 6.928517  |
| H  | 3.003227  | 2.041789  | 15.284311 | P  | 5.336871  | -4.266364 | 9.416379  |
| C  | 2.093111  | 2.597465  | 12.663692 | P  | 7.731786  | -2.548955 | 10.225995 |
| H  | 1.379440  | 3.239083  | 12.122145 | N  | 6.964993  | 1.012619  | 9.864296  |
| H  | 1.689038  | 2.417286  | 13.671036 | C  | 6.388916  | 1.935512  | 10.299402 |
| C  | 3.159116  | -0.101439 | 12.750237 | C  | 7.200012  | -4.338088 | 5.049519  |
| C  | 4.533218  | -0.296647 | 12.555466 | C  | 8.270181  | -5.035996 | 5.626722  |
| H  | 5.039318  | 0.205994  | 11.727623 | H  | 8.794394  | -4.636636 | 6.498628  |
| C  | 5.251225  | -1.129392 | 13.411605 | C  | 8.667504  | -6.262980 | 5.105352  |
| H  | 6.327651  | -1.251458 | 13.270242 | H  | 9.508010  | -6.793081 | 5.559064  |
| C  | 4.595497  | -1.800644 | 14.443809 | C  | 7.989698  | -6.814432 | 4.017163  |
| H  | 5.157354  | -2.460494 | 15.108912 | H  | 8.302938  | -7.777059 | 3.606634  |
| C  | 3.223240  | -1.631083 | 14.625814 | C  | 6.911765  | -6.133488 | 3.453924  |
| H  | 2.706413  | -2.164646 | 15.426713 | H  | 6.377521  | -6.561943 | 2.603026  |
| C  | 2.507344  | -0.777646 | 13.788519 | C  | 6.516271  | -4.897242 | 3.964492  |
| H  | 1.432087  | -0.646763 | 13.938375 | H  | 5.678407  | -4.363651 | 3.509600  |
| C  | 0.572613  | 0.425517  | 11.565898 | C  | 5.655294  | -1.944819 | 4.540086  |
| C  | -0.465668 | 0.803853  | 12.427069 | C  | 4.280126  | -1.842793 | 4.777056  |
| H  | -0.287644 | 1.509961  | 13.240889 | H  | 3.859407  | -2.237429 | 5.706995  |
| C  | -1.747279 | 0.282031  | 12.252589 | C  | 3.450950  | -1.233299 | 3.838549  |
| H  | -2.551754 | 0.583770  | 12.927168 | H  | 2.377408  | -1.172408 | 4.020827  |
| C  | -2.001369 | -0.625266 | 11.224861 | C  | 3.993634  | -0.695066 | 2.674350  |
| H  | -3.006354 | -1.031889 | 11.092087 | H  | 3.345224  | -0.204500 | 1.944899  |
| C  | -0.972543 | -1.006771 | 10.363302 | C  | 5.365789  | -0.785154 | 2.436988  |
| H  | -1.166333 | -1.716264 | 9.555795  | H  | 5.792925  | -0.365168 | 1.523870  |
| C  | 0.303825  | -0.475483 | 10.524935 | C  | 6.192830  | -1.418736 | 3.359105  |
| H  | 1.107462  | -0.759196 | 9.838638  | H  | 7.262019  | -1.500056 | 3.150706  |
| C  | 4.782647  | 6.422456  | 10.039859 | C  | 8.253486  | -1.826648 | 5.859077  |
| C  | 4.368226  | 7.442795  | 9.171718  | H  | 8.985038  | -2.483930 | 6.355171  |
| H  | 4.225441  | 7.247962  | 8.105935  | H  | 8.619893  | -1.597367 | 4.847393  |
| C  | 4.166067  | 8.730506  | 9.658470  | C  | 7.260980  | 0.855398  | 5.814406  |
| H  | 3.843084  | 9.522055  | 8.978555  | C  | 5.885243  | 1.074857  | 5.962079  |
| C  | 4.394282  | 9.014165  | 11.006524 | H  | 5.338176  | 0.586997  | 6.770216  |
| H  | 4.236000  | 10.027041 | 11.383667 | C  | 5.208567  | 1.906538  | 5.070199  |
| C  | 4.836449  | 8.011597  | 11.865928 | H  | 4.130714  | 2.048894  | 5.176479  |
| H  | 5.022587  | 8.228271  | 12.919379 | C  | 5.905362  | 2.544159  | 4.044904  |
| C  | 5.027031  | 6.718247  | 11.384890 | H  | 5.374977  | 3.198004  | 3.348750  |
| H  | 5.373860  | 5.932261  | 12.058396 | C  | 7.279142  | 2.344842  | 3.905325  |
| C  | 6.837998  | 4.905725  | 8.731081  | H  | 7.827809  | 2.848275  | 3.106062  |
| C  | 7.322402  | 3.921678  | 7.855735  | C  | 7.954747  | 1.498689  | 4.781931  |
| H  | 6.712380  | 3.059564  | 7.577393  | H  | 9.030823  | 1.343971  | 4.663738  |
| C  | 8.606349  | 4.028899  | 7.334348  | C  | 9.797241  | 0.260796  | 7.104664  |
| H  | 8.967890  | 3.265605  | 6.644273  | C  | 10.836482 | -0.083744 | 6.229953  |
| C  | 9.426620  | 5.098697  | 7.695796  | H  | 10.649806 | -0.729501 | 5.369023  |
| H  | 10.436385 | 5.174366  | 7.285972  | C  | 12.128427 | 0.389065  | 6.455224  |
| C  | 8.955362  | 6.069319  | 8.578311  | H  | 12.933339 | 0.115157  | 5.769370  |
| H  | 9.590829  | 6.911547  | 8.860664  | C  | 12.393120 | 1.208659  | 7.552125  |
| C  | 7.666314  | 5.977830  | 9.096488  | H  | 13.407370 | 1.574452  | 7.727271  |
| H  | 7.301390  | 6.750926  | 9.775506  | C  | 11.363957 | 1.552380  | 8.428188  |
| C  | 4.080971  | 4.351277  | 8.014838  | H  | 11.568332 | 2.188465  | 9.292295  |
| H  | 3.766472  | 5.262192  | 7.481961  | C  | 10.073092 | 1.075902  | 8.212427  |
| H  | 4.703182  | 3.773315  | 7.312309  | H  | 9.269653  | 1.331904  | 8.908506  |
| C  | 1.393391  | 4.248440  | 9.190752  | C  | 5.799185  | -6.004578 | 9.155694  |
| C  | 0.321224  | 3.567215  | 9.786765  | C  | 5.861112  | -6.919136 | 10.217849 |
| H  | 0.320679  | 2.473574  | 9.814097  | H  | 5.596066  | -6.606332 | 11.231916 |
| C  | -0.746565 | 4.270635  | 10.336842 | C  | 6.247980  | -8.234243 | 9.981254  |
| H  | -1.573306 | 3.723566  | 10.795947 | H  | 6.298161  | -8.944692 | 10.809450 |
| C  | -0.759528 | 5.666310  | 10.294805 | C  | 6.562257  | -8.648520 | 8.683682  |
| H  | -1.597484 | 6.219677  | 10.724544 | H  | 6.862217  | -9.683102 | 8.501634  |
| C  | 0.296314  | 6.349936  | 9.695139  | C  | 6.483768  | -7.748419 | 7.624018  |
| H  | 0.292103  | 7.441515  | 9.654042  | H  | 6.723226  | -8.065952 | 6.607135  |
| C  | 1.367334  | 5.645381  | 9.144494  | C  | 6.104685  | -6.428690 | 7.860025  |
| H  | 2.183034  | 6.204967  | 8.688231  | H  | 6.058937  | -5.714563 | 7.034433  |
| C  | 1.994203  | 2.833636  | 6.795287  | C  | 3.659310  | -4.369102 | 10.129284 |
| C  | 1.682746  | 1.499159  | 6.513782  | C  | 3.141745  | -3.310367 | 10.887273 |
| H  | 1.916328  | 0.726636  | 7.252195  | H  | 3.743537  | -2.424862 | 11.104612 |
| C  | 1.079626  | 1.163319  | 5.302535  | C  | 1.839448  | -3.374579 | 11.375529 |
| H  | 0.811484  | 0.124325  | 5.100599  | H  | 1.455438  | -2.554826 | 11.983532 |
| C  | 0.808377  | 2.151156  | 4.358619  | C  | 1.030989  | -4.473314 | 11.087804 |
| H  | 0.335968  | 1.887593  | 3.409568  | H  | 0.009080  | -4.515817 | 11.471472 |
| C  | 1.126546  | 3.483290  | 4.631093  | C  | 1.532301  | -5.515921 | 10.311333 |
| H  | 0.904378  | 4.260199  | 3.896175  | H  | 0.906053  | -6.380543 | 10.080240 |
| C  | 1.705261  | 3.826035  | 5.849634  | C  | 2.841038  | -5.467937 | 9.835365  |
| H  | 1.915534  | 4.876886  | 6.065261  | H  | 3.228709  | -6.297451 | 9.239915  |
| Cu | 5.667169  | -2.641061 | 7.846673  | C  | 6.397412  | -3.677970 | 10.816478 |

|   |           |           |           |
|---|-----------|-----------|-----------|
| H | 6.780839  | -4.508409 | 11.428449 |
| H | 5.768505  | -3.053045 | 11.470405 |
| C | 8.979408  | -3.610561 | 9.415306  |
| C | 10.023314 | -2.942636 | 8.756751  |
| H | 10.046714 | -1.849031 | 8.740744  |
| C | 11.041269 | -3.659988 | 8.135960  |
| H | 11.850174 | -3.124471 | 7.633381  |
| C | 11.026530 | -5.056710 | 8.161334  |
| H | 11.823803 | -5.621505 | 7.672840  |
| C | 9.997034  | -5.725984 | 8.819262  |
| H | 9.978777  | -6.817683 | 8.847886  |
| C | 8.979193  | -5.008355 | 9.449749  |
| H | 8.187733  | -5.558619 | 9.958808  |
| C | 8.578066  | -2.089786 | 11.783232 |
| C | 8.795123  | -0.738794 | 12.072767 |
| H | 8.442338  | 0.027720  | 11.379607 |
| C | 9.454859  | -0.376038 | 13.247273 |
| H | 9.637000  | 0.679851  | 13.459679 |
| C | 9.889564  | -1.353527 | 14.138879 |
| H | 10.407937 | -1.067854 | 15.057122 |
| C | 9.676742  | -2.703559 | 13.851439 |
| H | 10.028891 | -3.472926 | 14.542172 |
| C | 9.032291  | -3.071591 | 12.674583 |
| H | 8.900528  | -4.132275 | 12.443747 |

**Table S5.** Copper-phosphorous and copper-arsenic distances of the ground state DFT optimized and partially-optimized geometries of **A** and **B** (in Å). The distances extracted from the X-ray diffraction structures at 100 K (**A**<sub>exp (100 K)</sub>, **B**<sub>exp (100 K)</sub>) are given for sake of comparison in italics.

|         | <b>A</b> <sub>opt-full</sub> | <b>A</b> <sub>opt-const</sub> | <b>A</b> <sub>exp (100 K)</sub> | <b>B</b> <sub>opt-full</sub> | <b>B</b> <sub>opt-const</sub> | <b>B</b> <sub>exp (100 K)</sub> |
|---------|------------------------------|-------------------------------|---------------------------------|------------------------------|-------------------------------|---------------------------------|
| Cu1-Cu2 | 2.710                        | <i>2.957 const</i>            | <i>2.957</i>                    | 2.678                        | <i>2.867 const</i>            | <i>2.867</i>                    |
| Cu3-Cu4 | 2.721                        | <i>2.957 const</i>            | <i>2.957</i>                    | 2.687                        | <i>2.867 const</i>            | <i>2.867</i>                    |
| Cu-P    | 2.278                        | 2.280                         | 2.283                           | 2.281                        | 2.279                         | 2.243                           |
|         | 2.277                        | 2.299                         | <i>2.314</i>                    | 2.283                        | 2.293                         | 2.264                           |
|         | 2.276                        | 2.297                         | 2.296                           | 2.290                        | 2.278                         | 2.259                           |
|         | 2.280                        | 2.282                         | 2.273                           | 2.292                        | 2.273                         | 2.257                           |
|         |                              |                               |                                 | 2.288                        | 2.278                         | 2.243                           |
|         |                              |                               |                                 | 2.282                        | 2.292                         | 2.264                           |
|         |                              |                               |                                 | 2.290                        | 2.277                         | 2.259                           |
| Cu-As   |                              |                               |                                 | 2.294                        | 2.275                         | 2.257                           |
|         | 2.383                        | 2.364                         | 2.296                           |                              |                               |                                 |
|         | 2.388                        | 2.351                         | 2.490                           |                              |                               |                                 |
|         | 2.378                        | 2.366                         | 2.490                           |                              |                               |                                 |
|         | 2.367                        | 2.355                         | 2.240                           |                              |                               |                                 |

**Table S6.** Selected distances and angles of the TD-DFT optimized **S**<sub>1</sub> and **T**<sub>1</sub> of derivatives **A** and **B** compared to their starting geometries *i.e.* the fully DFT-optimized and constrained ground state (**S**<sub>0</sub>) (distances in Å, angles in degrees).

|            | Starting geometry     |                                                       |                       | Starting geometry     |                                                        |                       |
|------------|-----------------------|-------------------------------------------------------|-----------------------|-----------------------|--------------------------------------------------------|-----------------------|
|            | <b>S</b> <sub>0</sub> | <b>A</b> <sub>opt-full</sub><br><b>S</b> <sub>1</sub> | <b>T</b> <sub>1</sub> | <b>S</b> <sub>0</sub> | <b>A</b> <sub>opt-const</sub><br><b>S</b> <sub>1</sub> | <b>T</b> <sub>1</sub> |
| Cu1-Cu2    | 2.710                 | 2.691                                                 | 2.681                 | 2.957                 | 2.563                                                  | 2.592                 |
| Cu3-Cu4    | 2.721                 | 2.544                                                 | 2.575                 | 2.957                 | 2.702                                                  | 2.681                 |
| Cu1-C1     | 1.942                 | 1.939                                                 | 1.943                 | 1.918                 | 1.910                                                  | 1.921                 |
| Cu2-N2     | 1.985                 | 1.957                                                 | 1.961                 | 1.943                 | 1.944                                                  | 1.950                 |
| Cu3-C2     | 1.938                 | 1.904                                                 | 1.916                 | 1.924                 | 1.936                                                  | 1.940                 |
| Cu4-N1     | 1.986                 | 1.953                                                 | 1.957                 | 1.941                 | 1.960                                                  | 1.966                 |
| C1-N1      | 1.168                 | 1.173                                                 | 1.172                 | 1.166                 | 1.179                                                  | 1.176                 |
| C2-N2      | 1.167                 | 1.179                                                 | 1.175                 | 1.167                 | 1.173                                                  | 1.172                 |
| Cu1-P1     | 2.280                 | 2.279                                                 | 2.280                 | 2.279                 | 2.290                                                  | 2.277                 |
| Cu1-As1    | 2.367                 | 2.393                                                 | 2.393                 | 2.365                 | 2.368                                                  | 2.351                 |
| Cu2-P2     | 2.277                 | 2.266                                                 | 2.270                 | 2.294                 | 2.259                                                  | 2.264                 |
| Cu2-As2    | 2.382                 | 2.381                                                 | 2.382                 | 2.370                 | 2.356                                                  | 2.361                 |
| Cu3-P3     | 2.277                 | 2.258                                                 | 2.264                 | 2.290                 | 2.278                                                  | 2.291                 |
| Cu3-As3    | 2.387                 | 2.356                                                 | 2.361                 | 2.368                 | 2.365                                                  | 2.367                 |
| Cu4-P4     | 2.276                 | 2.280                                                 | 2.250                 | 2.259                 | 2.294                                                  | 2.291                 |
| Cu4-As4    | 2.378                 | 2.380                                                 | 2.363                 | 2.356                 | 2.370                                                  | 2.372                 |
| N1-N2      | 3.025                 | 3.127                                                 | 3.192                 | 3.087                 | 3.102                                                  | 3.176                 |
| C1-C2      | 3.961                 | 3.871                                                 | 3.910                 | 4.082                 | 3.857                                                  | 3.914                 |
| Cu2-C1     | 2.422                 | 2.427                                                 | 2.415                 | 2.648                 | 2.653                                                  | 2.808                 |
| Cu4-C2     | 2.424                 | 2.615                                                 | 2.802                 | 2.636                 | 2.423                                                  | 2.389                 |
| Cu4-Cu3-C2 | 59.9                  | 70.4                                                  | 75.6                  | 61.1                  | 60.3                                                   | 59.7                  |

|                 |        |        |        |       |       |       |
|-----------------|--------|--------|--------|-------|-------|-------|
| Cu1-Cu2-N2      | 141.9  | 142.3  | 143.1  | 134.9 | 132.3 | 130.2 |
| C1-Cu1-Cu2      | 60.1   | 60.7   | 60.5   | 61.5  | 71.0  | 75.3  |
| N1-Cu4-Cu3      | 139.8  | 134.6  | 130.9  | 135.1 | 141.1 | 143.5 |
| Cu3-Cu4-Cu1-N1  | 162.2  | -161.3 | -168.9 | 160.5 | 167.0 | 167.0 |
| Cu3-Cu4-Cu1-C1  | 157.9  | -160.9 | -161.6 | 159.5 | 167.0 | 168.8 |
| Cu1-Cu2-Cu3-N2  | -177.8 | -177.5 | -177.0 | 175.7 | 148.9 | 148.7 |
| Cu1-Cu2-Cu3-C2  | -175.9 | -175.1 | -175.5 | 174.0 | 151.2 | 141.8 |
| Cu2-Cu3-Cu4-Cu1 | 6.3    | 6.6    | 6.2    | 0.0   | 4.7   | 5.4   |
| Cu3-Cu4-Cu1-Cu2 | -11.8  | -12.3  | -11.6  | 0.0   | 9.0   | 10.1  |
| Cu4-Cu1-Cu2-Cu3 | 6.4    | 6.4    | 6.3    | 0.0   | 4.9   | 5.2   |
| Cu1-Cu2-Cu3-Cu4 | -11.9  | -12.3  | -11.9  | 0.0   | 9.0   | 9.8   |

|                 | Starting geometry              |                |                | Starting geometry               |                |                |
|-----------------|--------------------------------|----------------|----------------|---------------------------------|----------------|----------------|
|                 | $\mathbf{B}_{\text{opt-full}}$ |                |                | $\mathbf{B}_{\text{opt-const}}$ |                |                |
|                 | S <sub>0</sub>                 | S <sub>1</sub> | T <sub>1</sub> | S <sub>0</sub>                  | S <sub>1</sub> | T <sub>1</sub> |
| Cu1-Cu2         | 2.678                          | 2.670          | 2.614          | 2.867                           | 2.563          | 2.620          |
| Cu3-Cu4         | 2.687                          | 2.551          | 2.614          | 2.867                           | 2.606          | 2.614          |
| Cu1-C1          | 1.952                          | 1.944          | 1.918          | 1.931                           | 1.920          | 1.917          |
| Cu2-N2          | 1.992                          | 1.962          | 1.938          | 1.959                           | 1.930          | 1.938          |
| Cu3-C2          | 1.950                          | 1.912          | 1.965          | 1.931                           | 1.966          | 1.966          |
| Cu4-N1          | 1.993                          | 1.950          | 1.982          | 1.959                           | 1.978          | 1.982          |
| C1-N1           | 1.168                          | 1.172          | 1.172          | 1.166                           | 1.172          | 1.172          |
| C2-N2           | 1.168                          | 1.180          | 1.171          | 1.166                           | 1.172          | 1.171          |
| Cu1-P11         | 2.283                          | 2.284          | 2.290          | 2.278                           | 2.253          | 2.248          |
| Cu1-P12         | 2.281                          | 2.280          | 2.299          | 2.273                           | 2.245          | 2.247          |
| Cu2-P21         | 2.294                          | 2.293          | 2.247          | 2.293                           | 2.302          | 2.293          |
| Cu2-P22         | 2.290                          | 2.279          | 2.246          | 2.279                           | 2.287          | 2.294          |
| Cu3-P31         | 2.282                          | 2.263          | 2.279          | 2.275                           | 2.298          | 2.294          |
| Cu3-P32         | 2.288                          | 2.261          | 2.284          | 2.277                           | 2.299          | 2.298          |
| Cu4-P41         | 2.292                          | 2.283          | 2.296          | 2.292                           | 2.284          | 2.283          |
| Cu4-P42         | 2.290                          | 2.280          | 2.296          | 2.278                           | 2.280          | 2.278          |
| N1-N2           | 3.028                          | 3.106          | 3.223          | 3.110                           | 3.233          | 3.224          |
| C1-C2           | 3.908                          | 3.861          | 3.770          | 3.912                           | 3.717          | 3.760          |
| Cu2-C1          | 2.415                          | 2.438          | 3.163          | 2.678                           | 3.167          | 3.171          |
| Cu4-C2          | 2.426                          | 2.586          | 2.304          | 2.678                           | 2.285          | 2.303          |
| Cu4-Cu3-C2      | 60.7                           | 69.1           | 58.4           | 64.4                            | 58.0           | 58.3           |
| Cu1-Cu2-N2      | 140.7                          | 141.7          | 116.4          | 131.1                           | 115.5          | 115.9          |
| C1-Cu1-Cu2      | 60.5                           | 61.4           | 87.1           | 64.4                            | 88.7           | 87.3           |
| N1-Cu4-Cu3      | 140.7                          | 135.4          | 143.8          | 131.1                           | 143.9          | 143.6          |
| Cu3-Cu4-Cu1-N1  | 171.6                          | 151.9          | 175.9          | 172.0                           | 178.6          | 176.3          |
| Cu3-Cu4-Cu1-C1  | 171.3                          | 151.4          | 171.7          | 162.9                           | 175.9          | 172.7          |
| Cu1-Cu2-Cu3-N2  | 171.2                          | 171.0          | 167.7          | 171.6                           | 165.6          | 167.7          |
| Cu1-Cu2-Cu3-C2  | 171.4                          | 171.7          | 28.5           | 162.1                           | 18.8           | 25.6           |
| Cu2-Cu3-Cu4-Cu1 | 0.1                            | 0.7            | 2.8            | 0.0                             | 3.5            | 3.3            |
| Cu3-Cu4-Cu1-Cu2 | 0.3                            | 1.4            | 5.1            | 0.0                             | 6.7            | 6.2            |
| Cu4-Cu1-Cu2-Cu3 | 0.1                            | 0.7            | 2.4            | 0.0                             | 3.2            | 3.0            |
| Cu1-Cu2-Cu3-Cu4 | 0.3                            | 1.4            | 4.7            | 0.0                             | 6.2            | 5.7            |



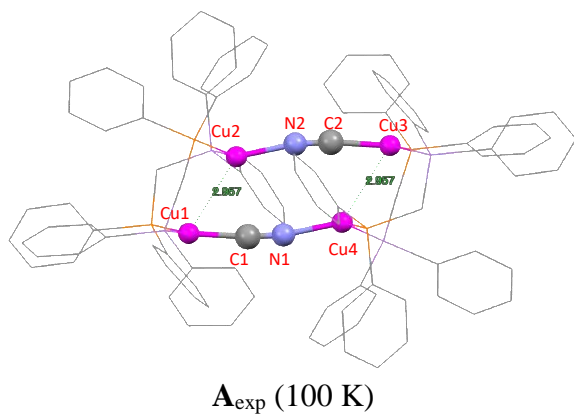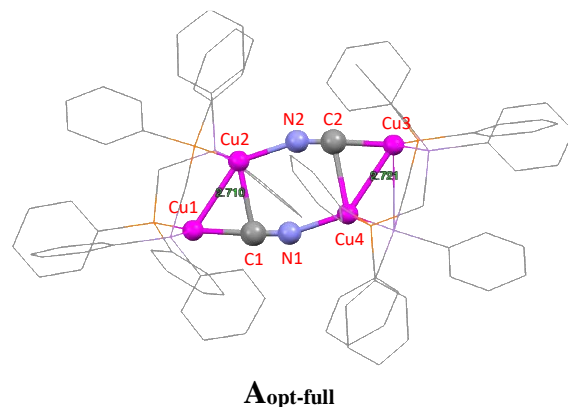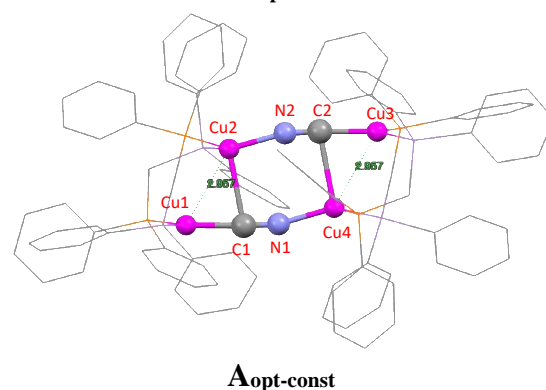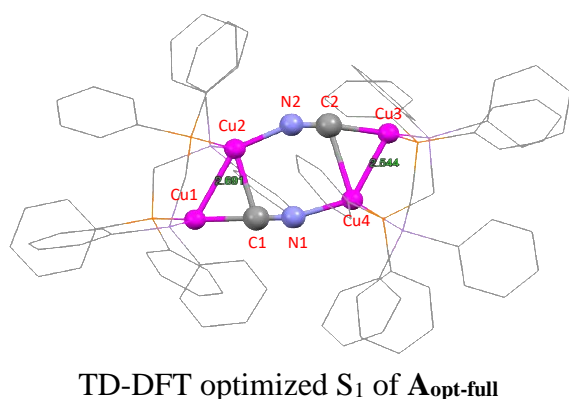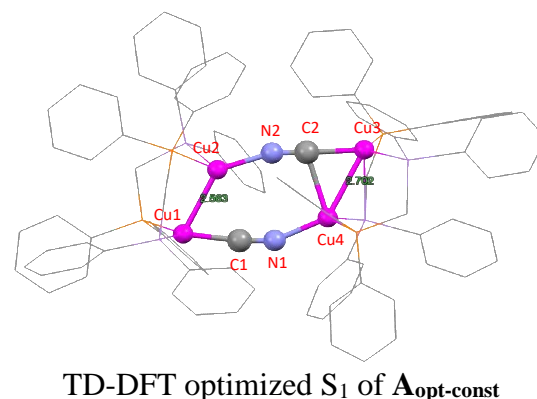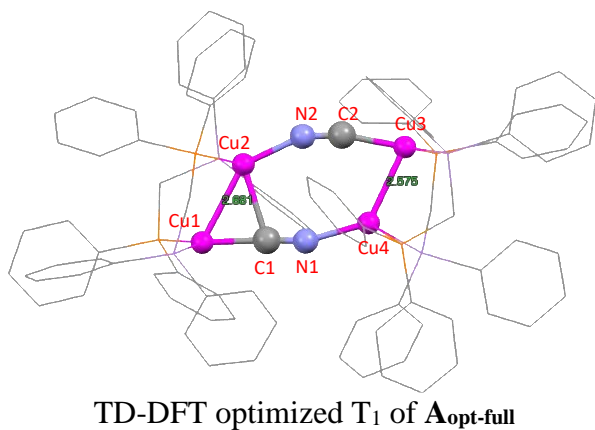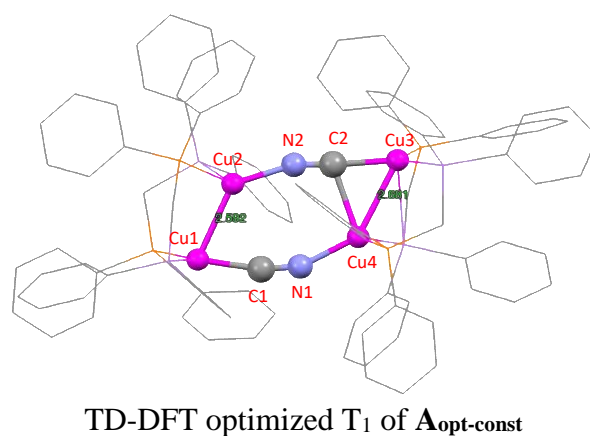

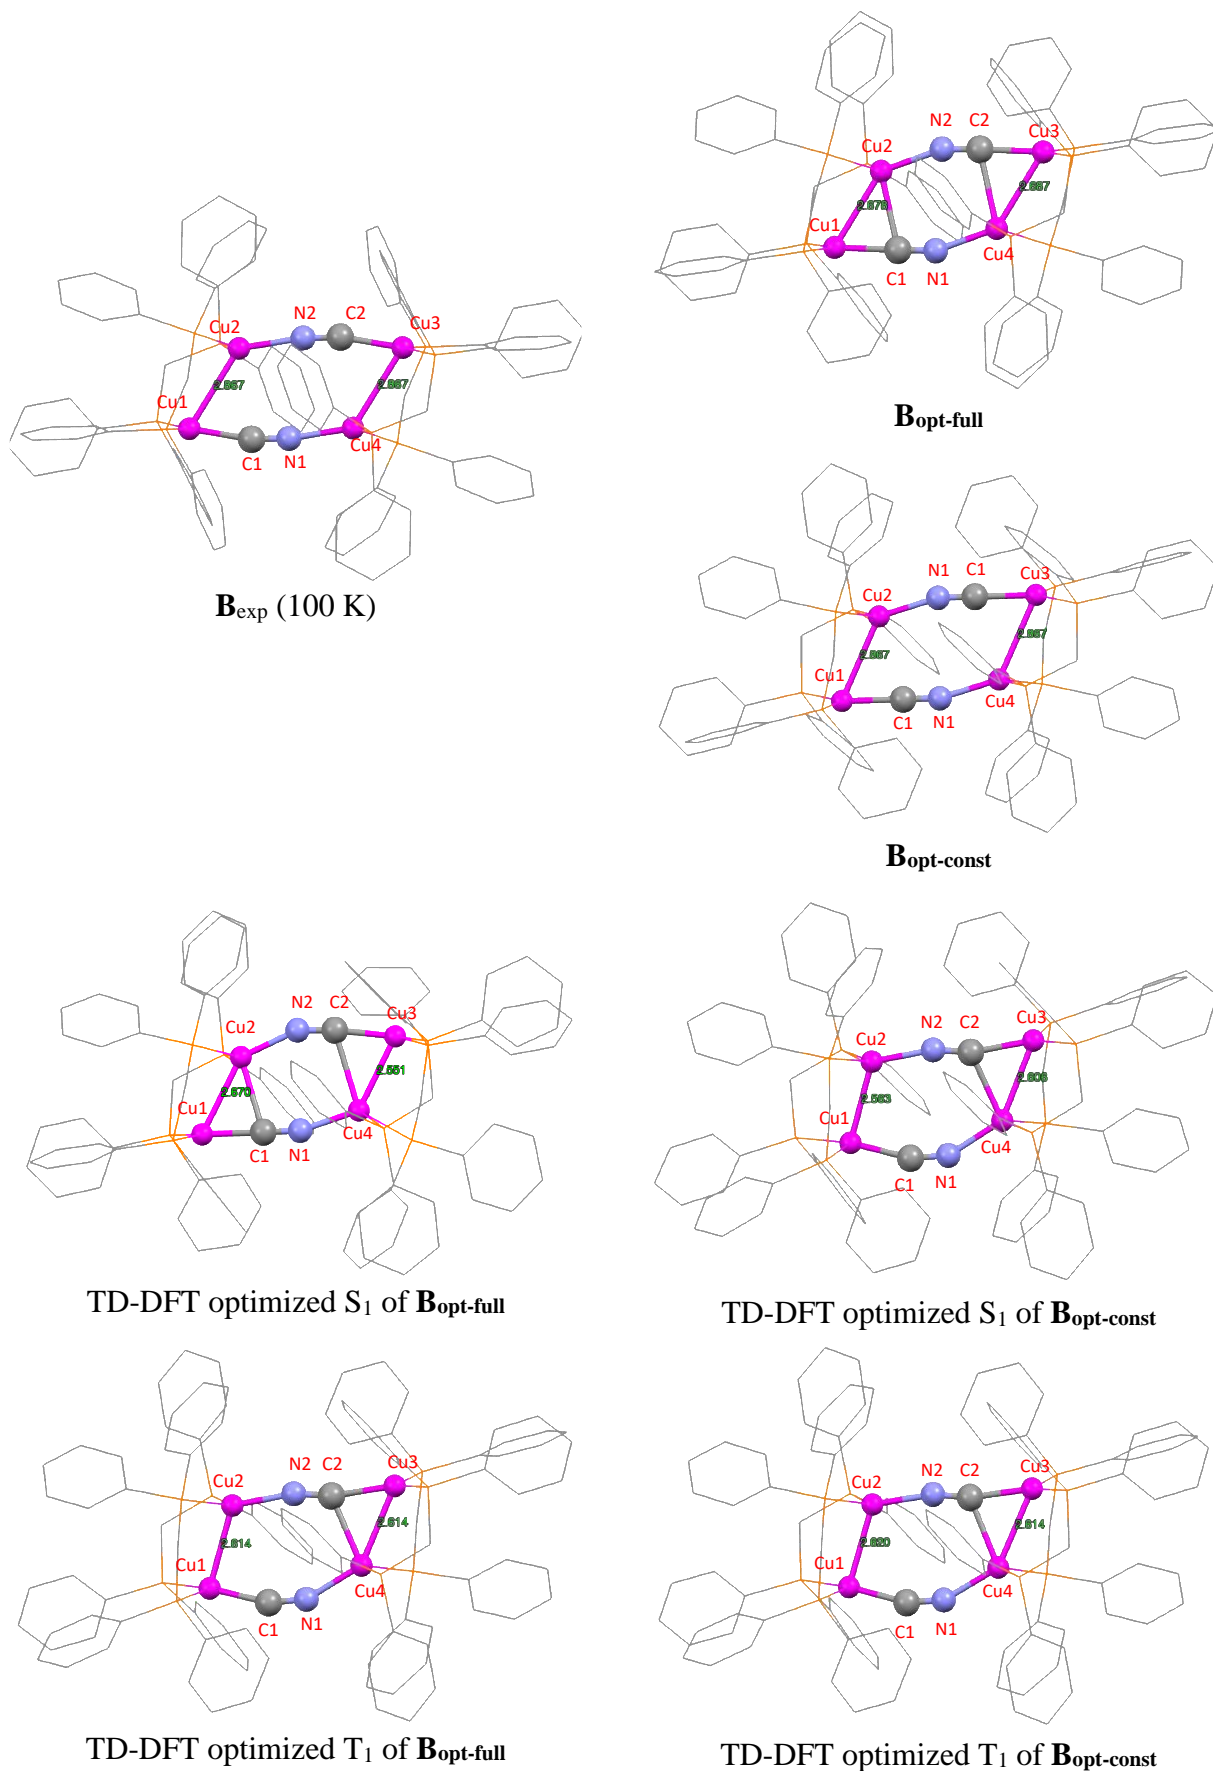

**Fig. S31.** Representations of the experimental and optimized geometries of ground state, and the lowest singlet and triplet excited states of **A** and **B**.

**Table S7.** Main characteristics of the first Franck Condon (FC) electronic excitations of  $\mathbf{A}_{\text{opt-full}}$ ,  $\mathbf{A}_{\text{opt-const}}$ ,  $\mathbf{B}_{\text{opt-full}}$  and  $\mathbf{B}_{\text{opt-const}}$ . Only molecular orbitals (MOs) transition contributions of more than 10 % are given.

| $\mathbf{A}_{\text{opt-full}}$ | Energy (eV) | Wavelength (nm) | Oscillator strength | Nature of the excitation                   |
|--------------------------------|-------------|-----------------|---------------------|--------------------------------------------|
| T <sub>1</sub> -FC             | 3.527       | 351             | 0.000               | 68 % HOMO to LUMO                          |
| T <sub>2</sub> -FC             | 3.604       | 344             | 0.000               | 84 % HOMO-1 to LUMO                        |
| T <sub>3</sub> -FC             | 3.656       | 339             | 0.000               | 45 % HOMO-2 to LUMO<br>26 % HOMO to LUMO+1 |
| S <sub>1</sub> -FC             | 3.746       | 331             | 0.009               | 77 % HOMO to LUMO                          |
| S <sub>2</sub> -FC             | 3.772       | 328             | 0.003               | 81 % HOMO-1 to LUMO                        |
| S <sub>3</sub> -FC             | 3.905       | 317             | 0.001               | 56 % HOMO-2 to LUMO<br>26 % HOMO to LUMO+1 |

  

| $\mathbf{A}_{\text{opt-const}}$ | Energy (eV) | Wavelength (nm) | Oscillator strength | Nature of the excitation                                            |
|---------------------------------|-------------|-----------------|---------------------|---------------------------------------------------------------------|
| T <sub>1</sub> -FC              | 3.554       | 349             | 0.000               | 70 % HOMO to LUMO<br>13 % HOMO-1 to LUMO                            |
| T <sub>2</sub> -FC              | 3.556       | 347             | 0.000               | 63 % HOMO-1 to LUMO<br>10 % HOMO to LUMO                            |
| T <sub>3</sub> -FC              | 3.707       | 334             | 0.000               | 45 % HOMO-2 to LUMO<br>11 % HOMO-1 to LUMO+1<br>12 % HOMO to LUMO+1 |
| S <sub>1</sub> -FC              | 3.710       | 334             | 0.000               | 77 % HOMO to LUMO<br>11 % HOMO-1 to LUMO                            |
| S <sub>2</sub> -FC              | 3.746       | 331             | 0.002               | 76 % HOMO-1 to LUMO<br>10 % HOMO to LUMO                            |
| S <sub>3</sub> -FC              | 3.935       | 315             | 0.000               | 56 % HOMO-2 to LUMO<br>11 % HOMO-1 to LUMO+1<br>12 % HOMO to LUMO+1 |

  

| $\mathbf{B}_{\text{opt-full}}$ | Energy (eV) | Wavelength (nm) | Oscillator strength | Nature of the excitation                                          |
|--------------------------------|-------------|-----------------|---------------------|-------------------------------------------------------------------|
| T <sub>1</sub> -FC             | 3.527       | 351             | 0.000               | 69 % HOMO to LUMO                                                 |
| T <sub>2</sub> -FC             | 3.635       | 341             | 0.000               | 29 % HOMO-1 to LUMO<br>27 % HOMO-2 to LUMO<br>13 % HOMO to LUMO+1 |
| T <sub>3</sub> -FC             | 3.641       | 340             | 0.000               | 52 % HOMO-1 to LUMO<br>18 % HOMO-2 to LUMO<br>13 % HOMO to LUMO+1 |
| S <sub>1</sub> -FC             | 3.770       | 329             | 0.017               | 83 % HOMO to LUMO                                                 |
| S <sub>2</sub> -FC             | 3.807       | 325             | 0.000               | 88 % HOMO-1 to LUMO                                               |
| S <sub>3</sub> -FC             | 3.909       | 317             | 0.000               | 55 % HOMO-2 to LUMO<br>22 % HOMO to LUMO+1                        |

| <b>B<sub>opt-const</sub></b> | E <sub>abs</sub> (eV) | Wavelength (nm) | Oscillator strength | Nature of the excitation                   |
|------------------------------|-----------------------|-----------------|---------------------|--------------------------------------------|
| T <sub>1</sub> -FC           | 3.513                 | 353             | 0.000               | 73 % HOMO to LUMO                          |
| T <sub>2</sub> -FC           | 3.564                 | 347             | 0.000               | 75 % HOMO-1 to LUMO                        |
| T <sub>3</sub> -FC           | 3.654                 | 339             | 0.000               | 59 % HOMO-2 to LUMO<br>16 % HOMO to LUMO+1 |
| S <sub>1</sub> -FC           | 3.708                 | 334             | 0.006               | 85 % HOMO to LUMO                          |
| S <sub>2</sub> -FC           | 3.743                 | 331             | 0.000               | 85 % HOMO-1 to LUMO                        |
| S <sub>3</sub> -FC           | 3.876                 | 319             | 0.000               | 64 % HOMO-2 to LUMO<br>18 % HOMO to LUMO+1 |

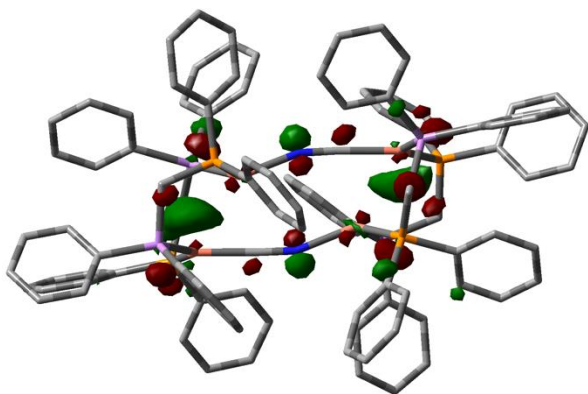

Aopt-full LUMO+1

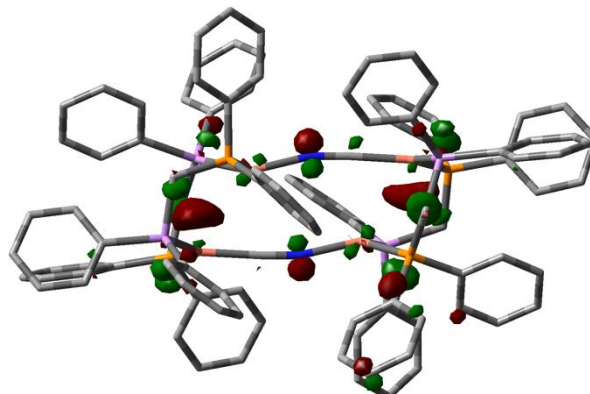

Aopt-const LUMO+1

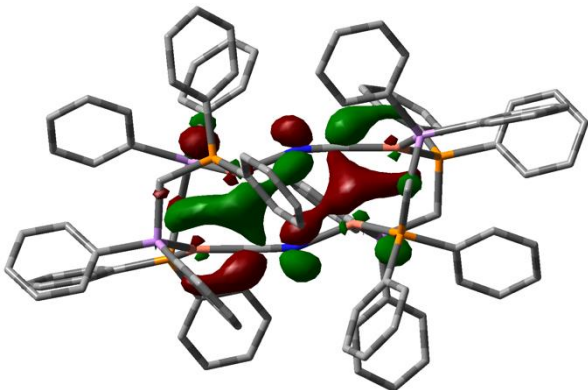

Aopt-full LUMO

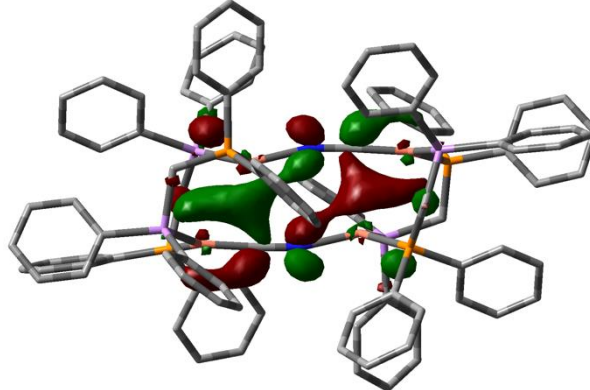

Aopt-const LUMO

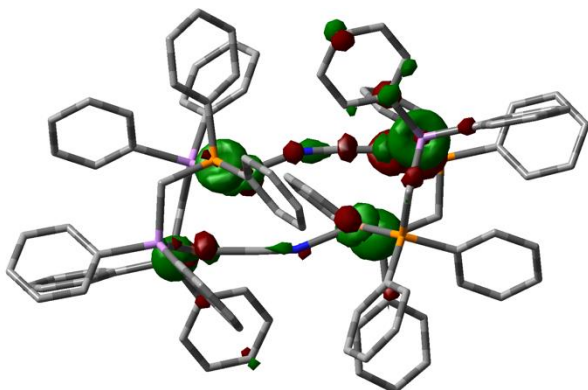

Aopt-full HOMO

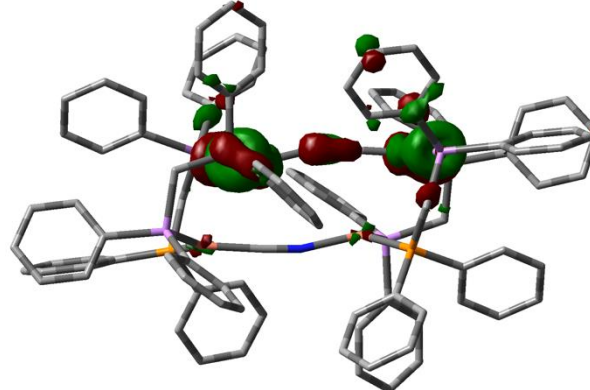

Aopt-const HOMO

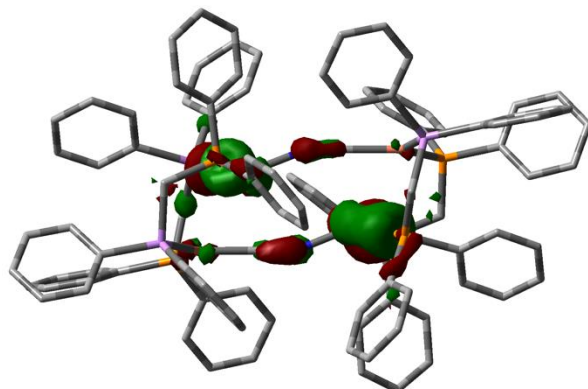

Aopt-full HOMO-1

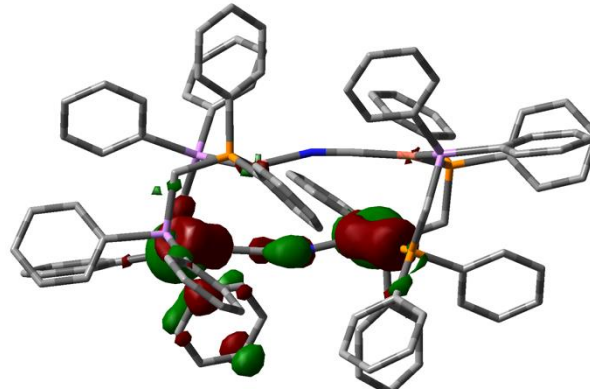

Aopt-const HOMO-1

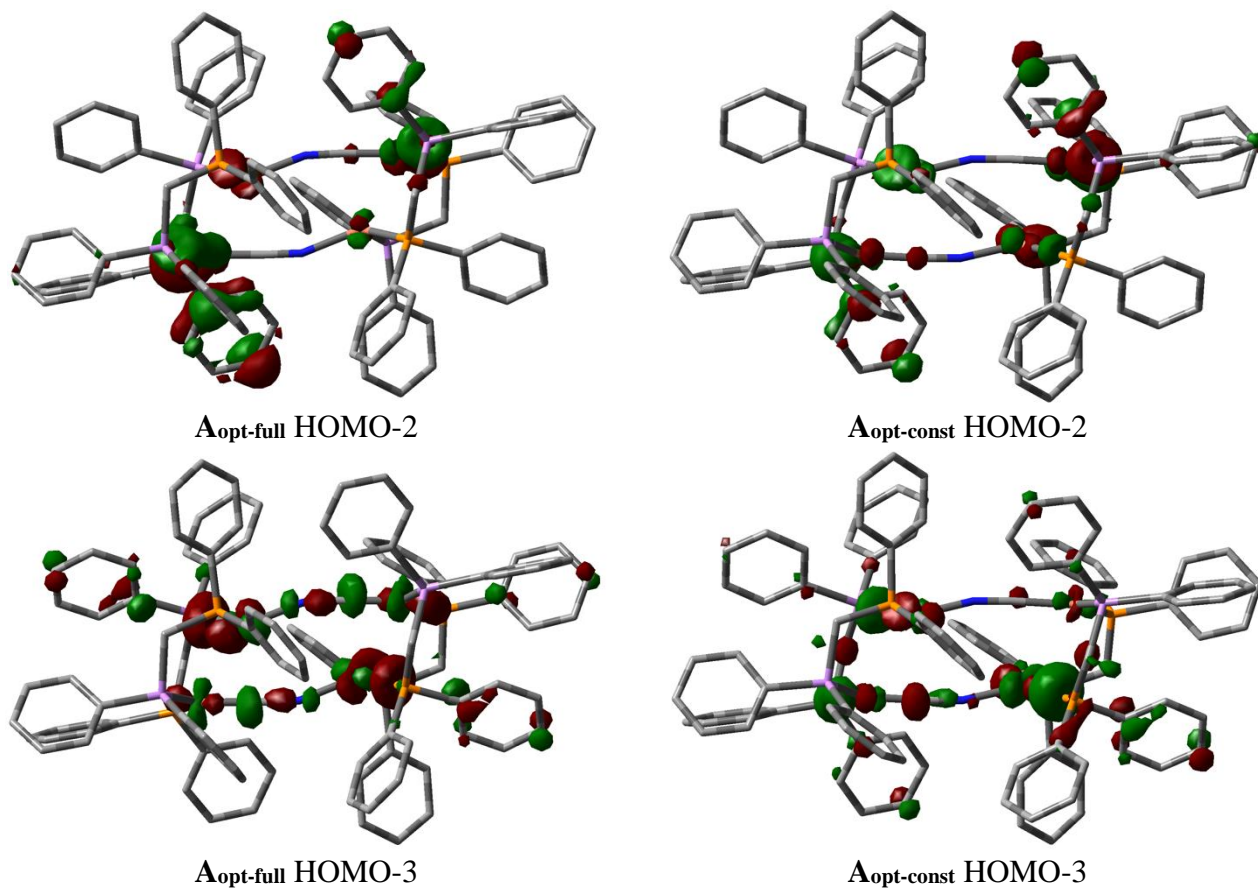

**Fig. S32.** Iso-contour plots of the frontier MOs involved in the description of the first FC electronic excitations of **A<sub>opt-full</sub>** and **A<sub>opt-const</sub>** ( $\pm 0.035$  [e/bohr<sup>3</sup>]<sup>1/2</sup>).

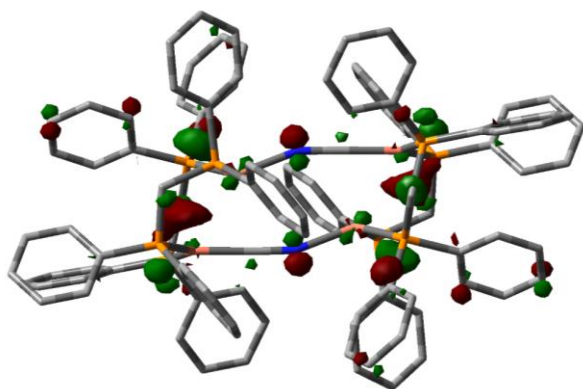

**Bopt-full LUMO+1**

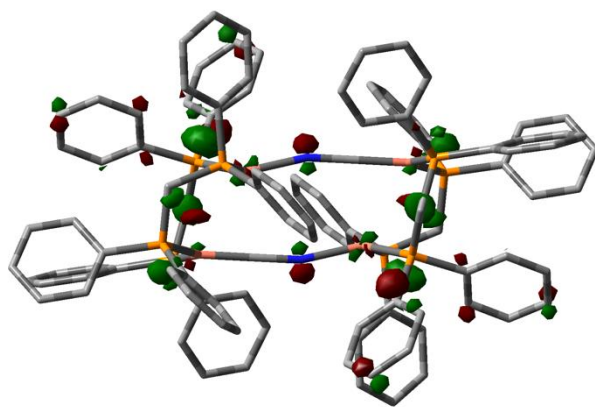

**Bopt-const LUMO+1**

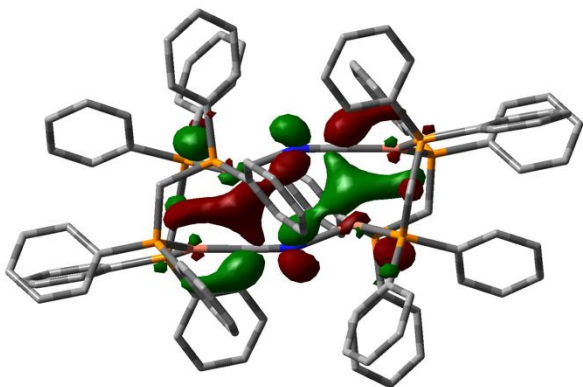

**Bopt-full LUMO**

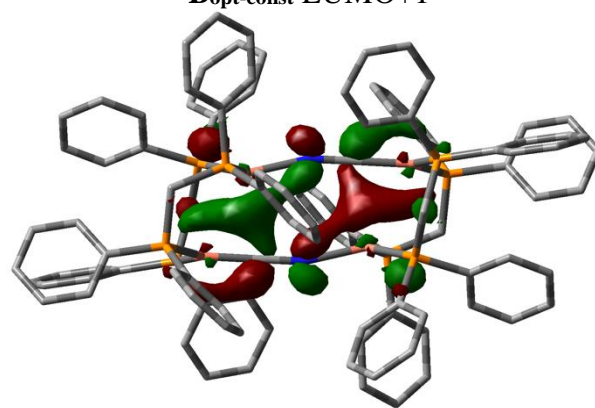

**Bopt-const LUMO**

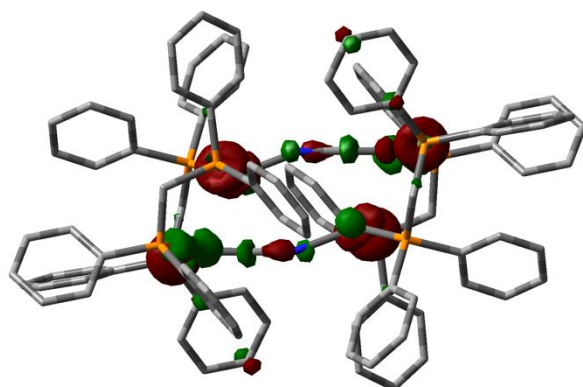

**Bopt-full HOMO**

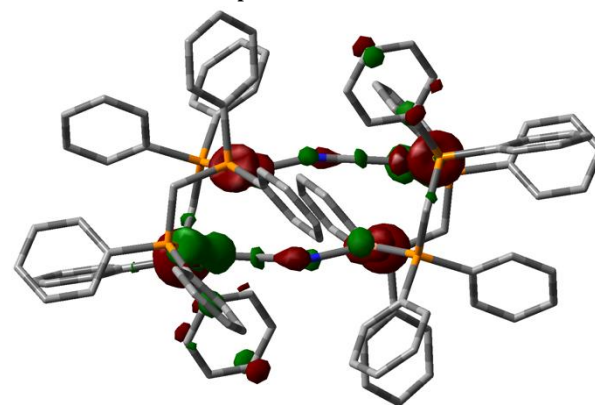

**Bopt-const HOMO**

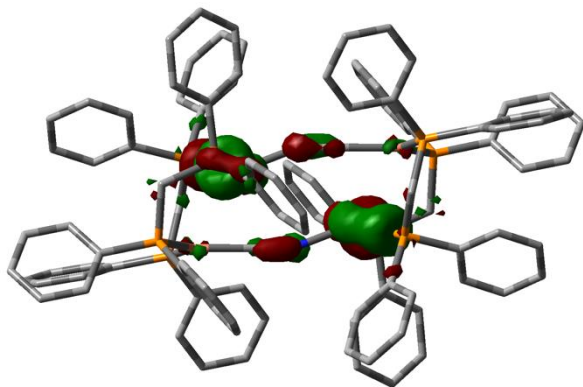

**Bopt-full HOMO-1**

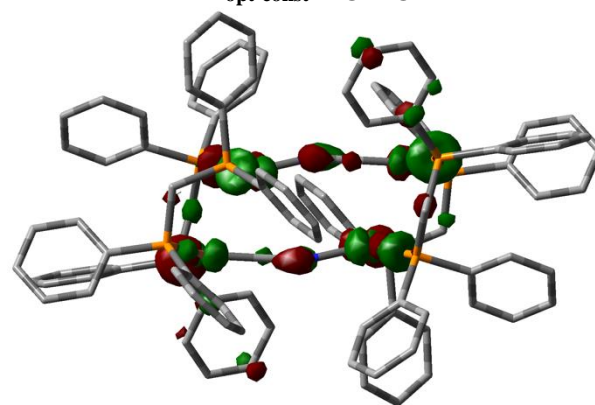

**Bopt-const HOMO-1**

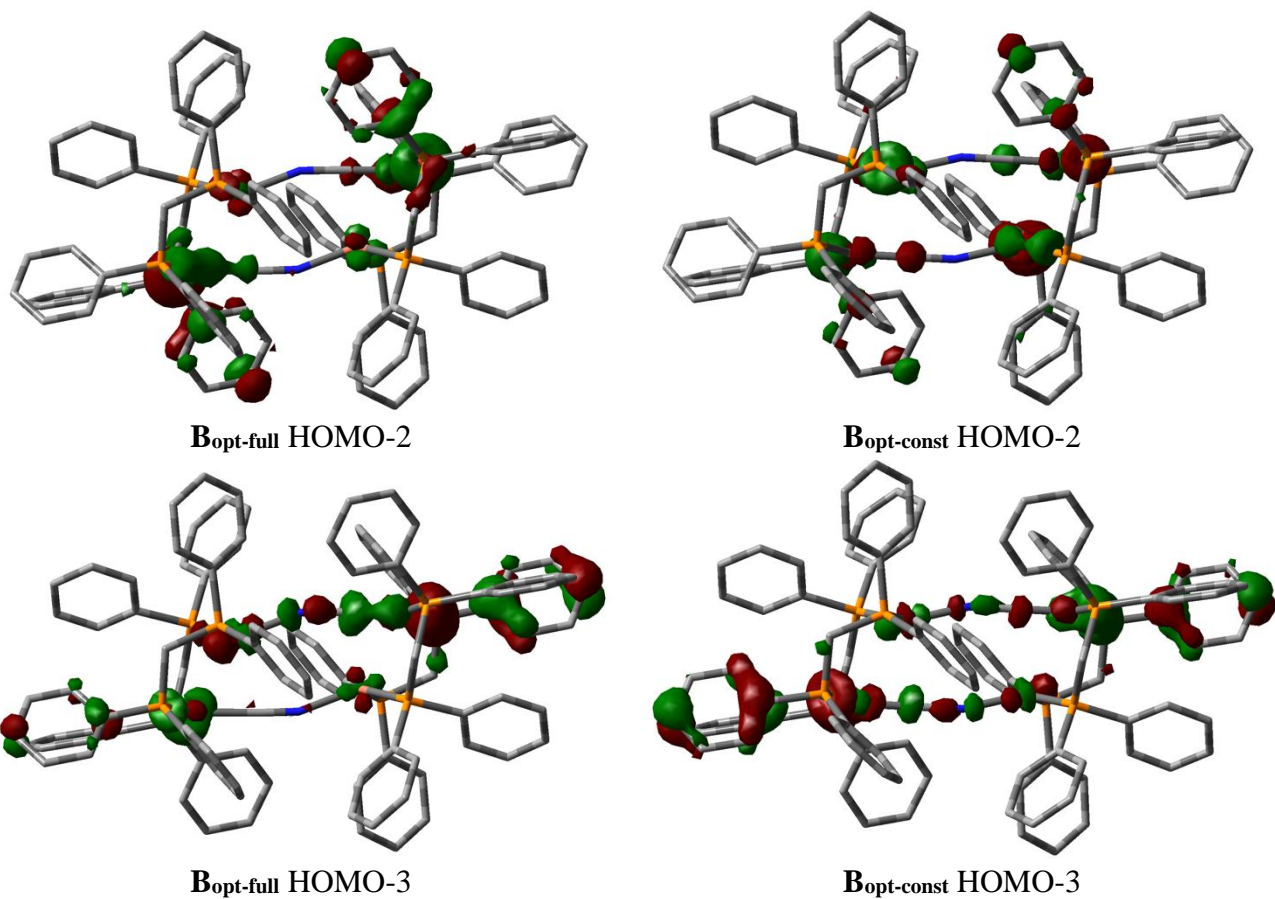

**Fig. S33.** Iso-contour plots of the frontier MOs involved in the description of the first FC electronic excitations of **B<sub>opt-full</sub>** and **B<sub>opt-const</sub>** ( $\pm 0.035$  [e/bohr<sup>3</sup>]<sup>1/2</sup>).



**Table S8.** Calculated relative energies (ground state  $S_0$  energy as reference) of the different excited states of  $\mathbf{A}_{\text{opt-full}}$ ,  $\mathbf{A}_{\text{opt-const}}$ ,  $\mathbf{B}_{\text{opt-full}}$  and  $\mathbf{B}_{\text{opt-const}}$  -  $S_0^\#$  corresponds to the energy on the potential energy surface of  $S_0$  at the geometry of  $S_1$  or  $T_1$ ; Spin orbit couplings (SOC) between states; reorganization energies ( $\Delta\lambda$ ); computed emission energies ( $\lambda_{\text{em}}$ ); radiative rate constants  $k_r^f$  and  $k_r^{ph}$  (Eq S1);  $T_1$  simulated lifetimes at 80 K considering only spontaneous emission. Calculated emission wavelengths and emission energies of the different  $S_1$  ( $\lambda_{\text{fluo}}$  and  $E_{\text{fluo}}$ ) and  $T_1$  ( $\lambda_{\text{ph}}$  and  $E_{\text{ph}}$ ).

|                                                             | $\mathbf{A}_{\text{opt-full}}$ | $\mathbf{A}_{\text{opt-const}}$ | $\mathbf{B}_{\text{opt-full}}$ | $\mathbf{B}_{\text{opt-const}}$ |
|-------------------------------------------------------------|--------------------------------|---------------------------------|--------------------------------|---------------------------------|
| $E_{\text{rel}} S_0$ (eV)                                   | 0.000                          | 0.000                           | 0.000                          | 0.000                           |
| $E_{\text{rel}} S_1$ (eV)                                   | 3.042                          | 3.102                           | 3.061                          | 3.105                           |
| $E_{\text{rel}} S_0^\#$ at $S_1$ geometry (eV)              | 0.642                          | 0.639                           | 0.657                          | 0.695                           |
| $E_{\text{rel}} T_1$ (eV)                                   | 2.791                          | 2.871                           | 2.881                          | 2.875                           |
| $E_{\text{rel}} S_0^\#$ at $T_1$ geometry (eV)              | 0.651                          | 0.680                           | 0.680                          | 0.684                           |
| $\Delta E_{\text{adiabatic}}(S_1-T_1)$ (eV)                 | 0.251                          | 0.231                           | 0.179                          | 0.230                           |
| $\Delta E_{\text{adiabatic}}(S_1-T_1)$ ( $\text{cm}^{-1}$ ) | 2025                           | 1863                            | 1445                           | 1852                            |
| SOC $S_1$ -FC/ $T_1$ -FC ( $\text{cm}^{-1}$ )               | 10                             | 6                               | 8                              | 9                               |
| SOC $T_1/S_0^\#$ ( $\text{cm}^{-1}$ )                       | 5                              | 6                               | 4                              | 4                               |
| $\Delta\lambda S_1$                                         | 0.555                          | 0.567                           | 0.539                          | 0.484                           |
| $\Delta\lambda T_1$                                         | 0.555                          | 0.631                           | 0.430                          | 0.521                           |
| $k_r^f$ ( $\text{s}^{-1}$ )                                 | $9.5 \cdot 10^5$               | $8.5 \cdot 10^5$                | $1.5 \cdot 10^6$               | $8.0 \cdot 10^5$                |
| $k_r^{ph}$ ( $\text{s}^{-1}$ )                              | $7.3 \cdot 10^2$               | $2.5 \cdot 10^2$                | $8.5 \cdot 10^2$               | $8.9 \cdot 10^2$                |
| $T_1$ lifetime (ms)                                         | 1.4                            | 4.0                             | 1.2                            | 1.1                             |
| $E_{\text{fluo}}$ (eV)                                      | 2.400                          | 2.464                           | 2.404                          | 2.410                           |
| $\lambda_{\text{fluo}}$ (nm)                                | 517                            | 504                             | 516                            | 514                             |
| $E_{\text{ph}}$ (eV)                                        | 2.140                          | 2.191                           | 2.201                          | 2.191                           |
| $\lambda_{\text{ph}}$ (nm)                                  | 579                            | 566                             | 563                            | 566                             |

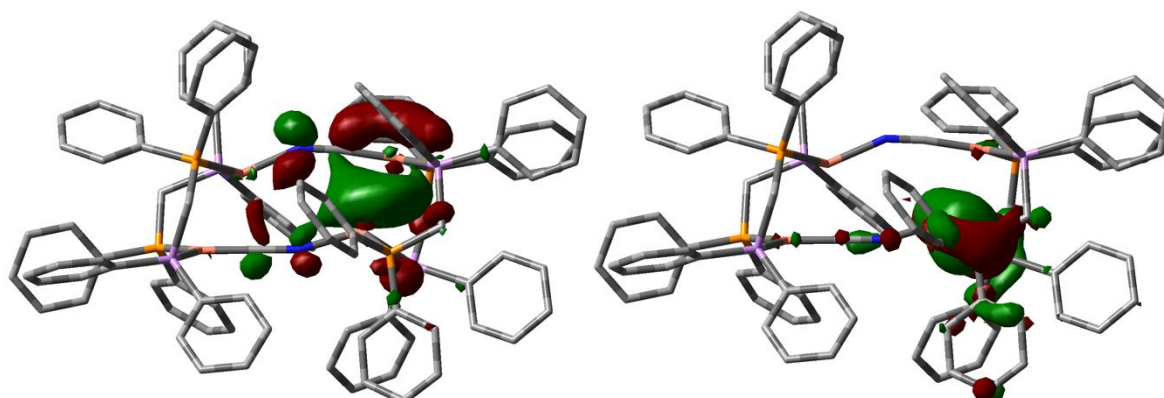

LUMO (left) and HOMO (right) representation of  $S_0^\#$   
 TD-DFT optimized  $S_1$  state of  $A_{opt-full}$

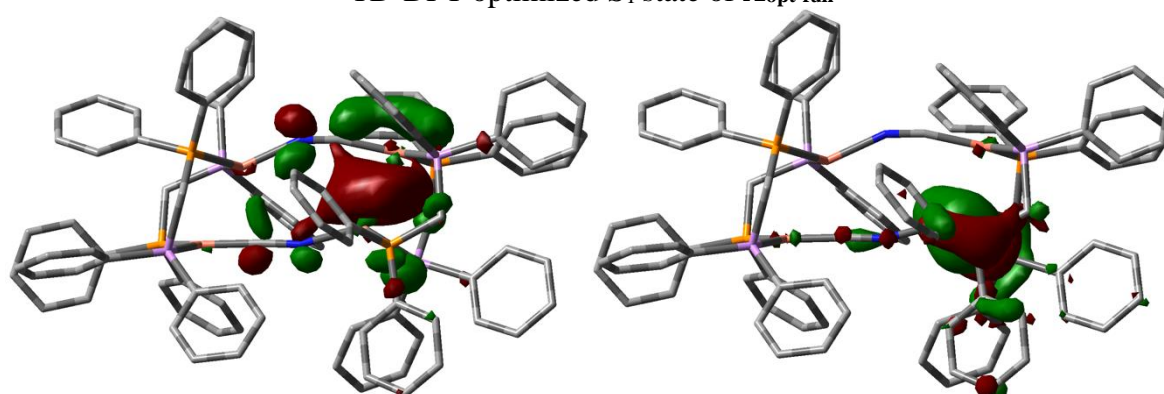

LUMO (left) and HOMO (right) representation of  $S_0^\#$   
 TD-DFT optimized  $T_1$  state of  $A_{opt-full}$

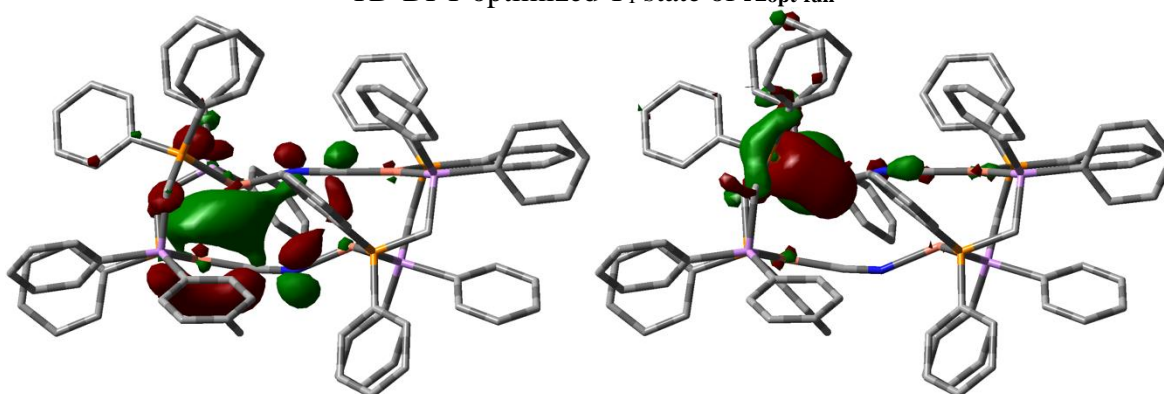

LUMO (left) and HOMO (right) representation of  $S_0^\#$   
 TD-DFT optimized  $S_1$  state of  $A_{opt-const}$

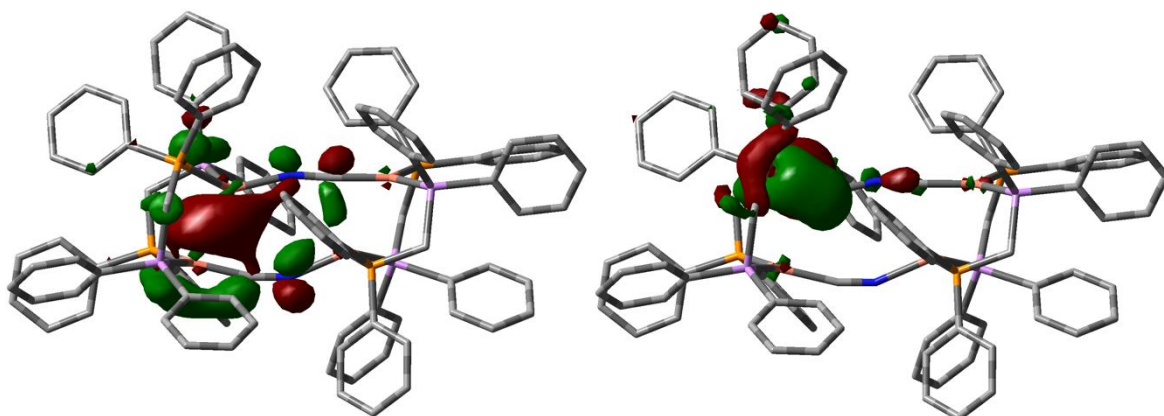

LUMO (left) and HOMO (right) representation of  $S_0^\#$   
 TD-DFT optimized  $T_1$  state of  $\mathbf{A}_{opt-const}$

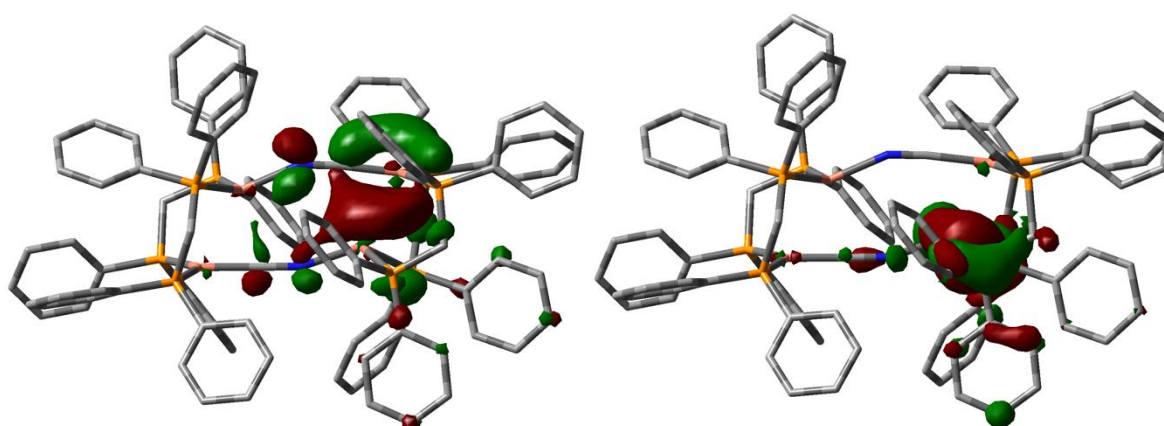

LUMO (left) and HOMO (right) representation of  $S_0^\#$   
 TD-DFT optimized  $S_1$  state of  $\mathbf{B}_{opt-full}$

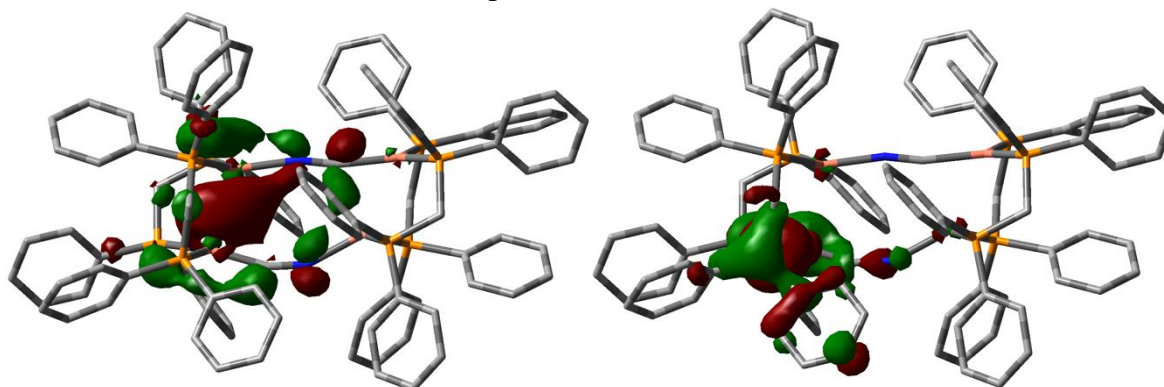

LUMO (left) and HOMO (right) representation of  $S_0^\#$   
 TD-DFT optimized  $T_1$  state of  $\mathbf{B}_{opt-full}$

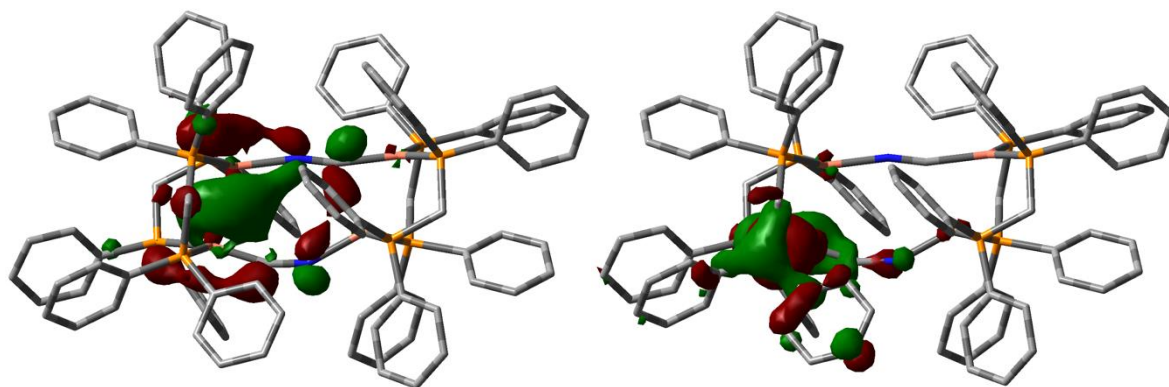

LUMO (left) and HOMO (right) representation of  $S_0^\#$   
 TD-DFT optimized  $S_1$  state of  $\mathbf{B}_{\text{opt-const}}$

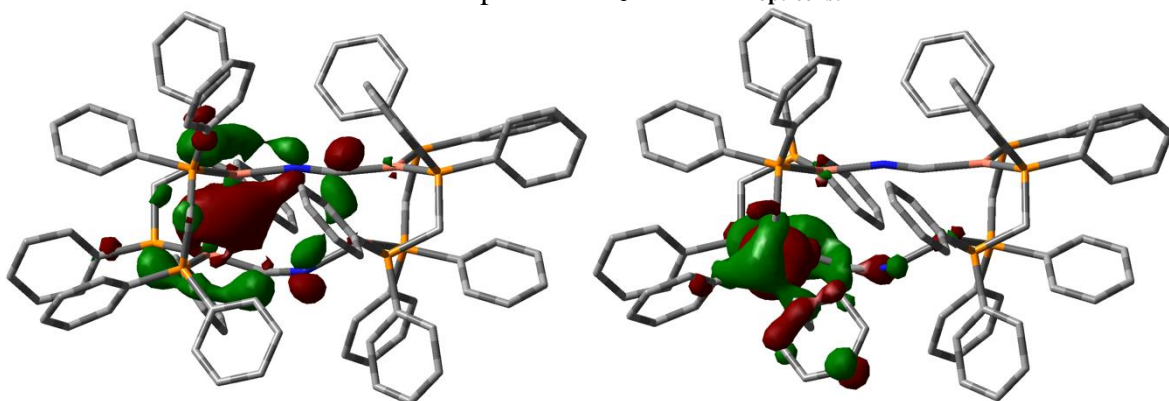

LUMO (left) and HOMO (right) representation of  $S_0^\#$   
 TD-DFT optimized  $T_1$  state of  $\mathbf{B}_{\text{opt-const}}$

**Fig. S34.** Iso-contour plots of the HOMO and LUMO at the geometries  $S_1$  and  $T_1$  of  $\mathbf{A}_{\text{opt-full}}$ ,  $\mathbf{A}_{\text{opt-const}}$ ,  $\mathbf{B}_{\text{opt-full}}$  and  $\mathbf{B}_{\text{opt-const}}$  on the potential energy surfaces of the ground state ( $S_0^\#$ ) ( $\pm 0.035$  [ $e/\text{bohr}^3$ ] $^{1/2}$ ). In all cases, the emission is mainly described by the LUMO to HOMO transition.

## References:

- 1 J. W. Dube, Y. Zheng, W. Thiel and M. Alcarazo, *J. Am. Chem. Soc.*, 2016, **138**, 6869–6877.
- 2 M. El Sayed Moussa, S. Evariste, H.-L. Wong, L. Le Bras, C. Roiland, L. Le Polles, B. Le Guennic, K. Costuas, V. W.-W. Yam and C. Lescop, *Chem. Commun.*, 2016, **52**, 11370–11373.
- 3 H. Yersin, A. F. Rausch, R. Czerwieniec, T. Hofbeck and T. Fischer, *Coordination Chemistry Reviews*, 2011, **255**, 2622–2652.
- 4 F. Neese, *WIREs Computational Molecular Science*, 2012, **2**, 73–78.
- 5 F. Neese, *WIREs Computational Molecular Science*, 2022, **12**, e1606.
- 6 J. P. Perdew, M. Ernzerhof and K. Burke, *The Journal of Chemical Physics*, 1996, **105**, 9982–9985.
- 7 C. Adamo and V. Barone, *The Journal of Chemical Physics*, 1999, **110**, 6158–6170.
- 8 A. Schäfer, H. Horn and R. Ahlrichs, *The Journal of Chemical Physics*, 1992, **97**, 2571–2577.
- 9 A. Schäfer, C. Huber and R. Ahlrichs, *The Journal of Chemical Physics*, 1994, **100**, 5829–5835.
- 10 R. Dennington, T. Keith and J. Millam, GaussView (version 6.1) Semichem Inc, Shawnee Mission, KS 2016.
- 11 E. van Lenthe, J. G. Snijders and E. J. Baerends, *The Journal of Chemical Physics*, 1996, **105**, 6505–6516.
- 12 M. E. Casida, in *Recent Advances in Density Functional Methods*, WORLD SCIENTIFIC, 1995, vol. Volume 1, pp. 155–192.
- 13 I. Tamm, in *Selected Papers*, eds. I. E. Tamm, B. M. Bolotovskii, V. Ya. Frenkel and R. Peierls, Springer, Berlin, Heidelberg, 1991, pp. 157–174.
- 14 S. M. Dancoff, *Phys. Rev.*, 1950, **78**, 382–385.
